# Supplementary material
Source: publisher site journal article supplement (https://www.dovepress.com/get_supplementary_file.php?f=261636.xlsx)
Supplement: Supplementary file 2 [file get_supplementary_file.php]

## Sheet: Over expressed genes
Supplementary Table 1: List of the over-expressed genes (FC≥4; p≤0.008; corrected p≤0.05) in the ZnO NPs-treated K562 cells compared with untreated K562 cells.
# Notes : Fold change >= 4.0
#Entity List : T Test paired p (Corr) ( Treated] vs [[Not treated] ) cut-off = 0.05
#Interpretation : Treatment (Non-averaged)
#Fold-Change cut-off : 4.0
#Pairing option : All against single condition
#Condition pairs :
#[Treated] vs [Not treated]
#Minimum number of pairs:1 out of 1 condition pairs.
# Technology : Agilent.SingleColor.39494
# Owner : gxuser
# Created On : Thu Nov 07 14:44:00 AST 2019
ProbeName	p ( [Treated] vs [Not treated] )	p (Corr) ( [Treated] vs [Not treated] )	FC ([Treated] vs [Not treated])	Log FC ([Treated] vs [Not treated])	FC (abs) ([Treated] vs [Not treated])	Regulation ([Treated] vs [Not treated])	SG14234408_253949440636_S001_GE1_1200_Jun14_1_3.txt:gProcessedSignal(raw)	SG14234408_253949440636_S001_GE1_1200_Jun14_2_1.txt:gProcessedSignal(raw)	SG14234408_253949440637_S001_GE1_1200_Jun14_1_3.txt:gProcessedSignal(raw)	SG14234408_253949440637_S001_GE1_1200_Jun14_2_1.txt:gProcessedSignal(raw)	SG14234408_253949440638_S001_GE1_1200_Jun14_1_3.txt:gProcessedSignal(raw)	SG14234408_253949440638_S001_GE1_1200_Jun14_2_1.txt:gProcessedSignal(raw)	SG14234408_253949440636_S001_GE1_1200_Jun14_1_3.txt:gProcessedSignal(normalized)	SG14234408_253949440636_S001_GE1_1200_Jun14_2_1.txt:gProcessedSignal(normalized)	SG14234408_253949440637_S001_GE1_1200_Jun14_1_3.txt:gProcessedSignal(normalized)	SG14234408_253949440637_S001_GE1_1200_Jun14_2_1.txt:gProcessedSignal(normalized)	SG14234408_253949440638_S001_GE1_1200_Jun14_1_3.txt:gProcessedSignal(normalized)	SG14234408_253949440638_S001_GE1_1200_Jun14_2_1.txt:gProcessedSignal(normalized)	SG14234408_253949440638_S001_GE1_1200_Jun14_1_3.txt:gFEFlags	GeneSymbol	Description	Sequence	EnsemblID	EntrezGeneID	GenbankAccession	GeneName
A_23_P364324	0.00612544	0.0465705	4.24597	2.08609	4.24597	up	247.661	75.9319	353.382	71.078	341.568	84.2739	0.975531	-1.04192	1.08352	-1.3147	0.921303	-0.921303	Detected	ABCA13	Homo sapiens ATP-binding cassette, sub-family A (ABC1), member 13 (ABCA13), mRNA [NM_152701]	ACAATCACTGATAGCTTTGTTGTGAGCAATTTTGATTCCCATGTATCACATGAATTACAC	ENST00000435803	154664	NM_152701	ATP-binding cassette, sub-family A (ABC1), member 13
A_23_P7562	0.000211621	0.0298991	4.78866	2.25962	4.78866	up	290.136	72.9825	401.332	87.5697	390.105	75.3834	1.15423	-1.14874	1.21743	-1.06333	1.06333	-1.1318	Detected	ACSL6	Homo sapiens acyl-CoA synthetase long-chain family member 6 (ACSL6), transcript variant 2, mRNA [NM_001009185]	AAACAAATAGAAGAGCTTTACTCAATCTCCATGTGAAGTTCAAGGAAAGTTCTTCTCAGT	ENST00000493861	23305	NM_001009185	acyl-CoA synthetase long-chain family member 6
A_33_P3390656	0.00380218	0.0404863	6.12303	2.61425	6.12303	up	161.849	30.4412	206.278	44.5274	212.134	26.5086	1.23947	-1.48295	1.18454	-1.11175	1.11175	-1.71228	Detected	ACSL6	Homo sapiens acyl-CoA synthetase long-chain family member 6 (ACSL6), transcript variant 2, mRNA [NM_001009185]	ATGTGTGAGAGGACCAAATGTGTTCAAAGGCTACTTGAAAGATCCAGACAGGACGAAGGA	ENST00000543479	23305	NM_001009185	acyl-CoA synthetase long-chain family member 6
A_23_P120594	0.000409196	0.030178	12.5236	3.64658	12.5236	up	370.459	36.7871	554.99	51.2915	545.154	35.222	1.67093	-1.97298	1.84921	-1.67093	1.71025	-2.06546	Detected	ACSS1	Homo sapiens acyl-CoA synthetase short-chain family member 1 (ACSS1), transcript variant 1, mRNA [NM_032501]	TGTTGGCTGCAGGGTACACAAATACTGAGTGGTGGTCTTTTGTTACAGGCTTAGCAACAA	ENST00000484396	84532	NM_032501	acyl-CoA synthetase short-chain family member 1
A_23_P256158	0.00152931	0.0337835	4.08216	2.02933	4.08216	up	1154.94	317.711	1263.03	358.848	1413.32	309.603	1.22484	-0.949051	0.949051	-0.950866	0.998082	-1.0161	Detected	ADRA2C	Homo sapiens adrenoceptor alpha 2C (ADRA2C), mRNA [NM_000683]	TAGTCGGGGGGTGGCTGCCAGGGGGCAAGGAGAAAGCACCGACAATCTTTGATTACTGAA	ENST00000330055	152	NM_000683	adrenoceptor alpha 2C
A_24_P867342	0.000341015	0.0298991	4.34894	2.12066	4.34894	up	167.203	45.919	198.688	47.7761	189.271	40.5835	1.25774	-0.91856	1.10178	-1.03884	0.91856	-1.12652	Detected	AFMID	Homo sapiens arylformamidase (AFMID), transcript variant 3, non-coding RNA [NR_027083]	ACAGATAGGAATTGAAGGCTTGAGAACTCCTGTGTGAATTAAATCACGACCTTCTGATGA	ENST00000589256	125061	NR_027083	arylformamidase
A_24_P303145	0.00472814	0.0428862	10.5165	3.39458	10.5165	up	67.7459	6.07594	87.5377	8.71417	74.1761	8.31945	1.8772	-1.91361	1.84211	-1.57083	1.48999	-1.48999	Detected	ANKH	Homo sapiens ANKH inorganic pyrophosphate transport regulator (ANKH), mRNA [NM_054027]	TACATGTCGCTTTTAAGGAAGTGCTCTTTATGTATCTAACAGATGGAAGTTTTTGCATTG	ENST00000284268	56172	NM_054027	ANKH inorganic pyrophosphate transport regulator
A_23_P372834	0.000466234	0.0312935	6.11968	2.61346	6.11968	up	5747.95	1101.22	6165.8	1049.42	8254.47	1286.43	1.40246	-1.29335	1.09884	-1.54033	1.40656	-1.09884	Detected	AQP1	Homo sapiens aquaporin 1 (Colton blood group) (AQP1), transcript variant 1, mRNA [NM_198098]	CCTCTGCATATATGTCTCTTTGGAGTTGGAATTTCATTATATGTTAAGAAAATAAAGGAA	ENST00000311813	358	NM_198098	aquaporin 1 (Colton blood group)
A_32_P171061	0.00541835	0.0447722	4.72566	2.24051	4.72566	up	697.682	166.442	777.414	219.233	864.427	141.803	1.20409	-1.17532	0.955343	-0.955343	0.995235	-1.43621	Detected	ASCL2	Homo sapiens achaete-scute family bHLH transcription factor 2 (ASCL2), mRNA [NM_005170]	CTGCTGGAGGGACACTGCTGGCAAACGGAGACCTATTTTTGTACAAAGAACCCTTGACCT	ENST00000331289	430	NM_005170	achaete-scute family bHLH transcription factor 2
A_23_P29735	0.00102222	0.0322856	6.57861	2.71778	6.57861	up	102.977	17.9292	102.262	18.5459	155.331	20.1234	1.55596	-1.27784	1.14104	-1.40652	1.63095	-1.14104	Detected	BSN	Homo sapiens bassoon presynaptic cytomatrix protein (BSN), mRNA [NM_003458]	AGAGTGCTGTACAAAGTCAAACAAACAAGTTTACAGTTGTAAGTGCAATGACCCGAGTCC	ENST00000296452	8927	NM_003458	bassoon presynaptic cytomatrix protein
A_33_P3531206	0.000785957	0.0322856	7.28578	2.86508	7.28578	up	19.5698	3.18892	29.9755	4.87305	36.1757	4.11244	1.24753	-1.68182	1.45782	-1.24753	1.61589	-1.34465	Detected	C1QTNF9B-AS1	Homo sapiens C1QTNF9B antisense RNA 1 (C1QTNF9B-AS1), transcript variant 1, mRNA [NM_001014442]	GTATTTTTACTCCGTTTTTGACCAAAGACACCTGAACATTCCTGGAGAAAACAGTGATGT		542767	NM_001014442	C1QTNF9B antisense RNA 1
A_23_P305245	0.00113385	0.0325974	11.8434	3.56601	11.8434	up	47.418	5.05286	48.3922	4.96002	63.4601	4.07356	1.95883	-1.5833	1.5833	-1.78753	1.86121	-1.92387	Detected	C3orf80	Homo sapiens chromosome 3 open reading frame 80 (C3orf80), mRNA [NM_001168214]	CATGATCCAAAACATAAGAACTTACGACTTGTAACTCGTTTAAAGCCATTAATTGTGCAG	ENST00000326474	401097	NM_001168214	chromosome 3 open reading frame 80
A_23_P168916	0.000949641	0.0322856	4.4274	2.14646	4.4274	up	12652.2	3414.05	13238.6	3473.77	15635.6	2963.53	1.2706	-0.931097	0.931097	-1.08355	1.05801	-1.16503	Detected	CA1	Homo sapiens carbonic anhydrase I (CA1), transcript variant 2, mRNA [NM_001738]	TTTGATGATTCTGAGAAGAAACTTGTCCTTCCTCAAGAACACAGCCCTGCTTCTGACATA	ENST00000523022	759	NM_001738	carbonic anhydrase I
A_33_P3291454	0.000776473	0.0322856	6.76314	2.75769	6.76314	up	4576.12	769.788	4918.26	849.358	10153.6	1315.9	1.22027	-1.66318	0.919427	-1.69875	1.85202	-0.919427	Detected	CCDC172	Homo sapiens coiled-coil domain containing 172 (CCDC172), mRNA [NM_198515]	TTGTTTACTAGTGTATAGCACTTCTCCACTTTGCTCCTGCTGCCACCGTATGAGATGTCT	ENST00000333254	374355	NM_198515	coiled-coil domain containing 172
A_33_P3329326	0.00139312	0.0332716	24.3428	4.60542	24.3428	up	198.28	8.74752	654.643	36.1245	305.681	10.1381	1.47291	-3.34147	2.79122	-1.47291	1.57936	-3.15839	Detected	CD164L2	CD164 sialomucin-like 2 [Source:HGNC Symbol;Acc:HGNC:32043] [ENST00000374025]	TGTTGGATGTCTAGAGTAGGGACAGGGCTGCATCTGAATCGGAAGTTTAGCGGTGAGTGG	ENST00000374025	388611		CD164 sialomucin-like 2
A_33_P3251144	0.00365085	0.0402213	7.51705	2.91017	7.51705	up	25.4853	3.3274	23.6761	3.98215	32.3984	4.04541	1.75402	-1.49505	1.24292	-1.41337	1.58224	-1.24292	Detected	CDCA7L	Homo sapiens cell division cycle associated 7-like (CDCA7L), transcript variant 2, mRNA [NM_001127370]	CCAGGAGAGTTCAGATGCTTTGCTGAAAAGGACCATGAACATCAAGGAGAACAAAGCCAT	ENST00000465490	55536	NM_001127370	cell division cycle associated 7-like
A_19_P00808208	0.00176304	0.034511	6.87374	2.78109	6.87374	up	153.885	31.8266	229.447	35.7145	255.178	28.4257	1.2927	-1.2927	1.46415	-1.3039	1.50433	-1.4855	Detected	CDCA7L	Homo sapiens cell division cycle associated 7-like (CDCA7L), transcript variant 2, mRNA [NM_001127370]	CAAGTTTGCCTTAGCACGAGTGACCACAGTTTAATAGACCACACACATCATTTAACCTGC	ENST00000373934	55536	NM_001127370	cell division cycle associated 7-like
A_23_P337849	0.00602286	0.0463531	7.4382	2.89495	7.4382	up	20.8379	4.70622	33.1354	3.78968	32.6691	3.57939	1.22922	-1.22922	1.49351	-1.71918	1.3599	-1.65383	Detected	CELF3	Homo sapiens CUGBP, Elav-like family member 3 (CELF3), transcript variant 1, mRNA [NM_007185]	TGGGGAGGGGTCAAGGGGTTTATTACCTGATCATTTTCTTTAGGAAGAGGTTTTAGGGAA	ENST00000420342	11189	NM_007185	CUGBP, Elav-like family member 3
A_23_P385911	0.00128639	0.0332716	4.04998	2.01791	4.04998	up	157.297	45.8939	224.915	55.9464	160.515	38.7767	1.23476	-0.854215	1.34579	-0.745944	0.745944	-1.12709	Detected	CEP44	Homo sapiens centrosomal protein 44kDa (CEP44), transcript variant 2, mRNA [NM_001145314]	AAGGCCAAGACCATCTTTTGTACCGTTGGTACAGTAGGCTAAAGGTACGGTGTTCCATAT	ENST00000396791	80817	NM_001145314	centrosomal protein 44kDa
A_33_P3415097	0.00258013	0.0372215	13.0117	3.70174	13.0117	up	66.3256	6.33952	101.537	6.59295	89.6555	7.63748	1.77162	-1.92737	1.98112	-2.04829	1.68841	-1.68841	Detected	CLCN4	Homo sapiens chloride channel, voltage-sensitive 4 (CLCN4), transcript variant 1, mRNA [NM_001830]	TTGATGAGATATATTCACATTTGGTGTTGGAACGACCACATAGCAACGTGTTGGTTTTTT	ENST00000380833	1183	NM_001830	chloride channel, voltage-sensitive 4
A_23_P215913	0.00322057	0.0388704	22.3689	4.48342	22.3689	up	335.049	15.9882	376.326	25.3735	483.838	15.6482	2.22478	-2.47638	1.98753	-1.98753	2.2369	-2.53715	Detected	CLU	Homo sapiens clusterin (CLU), transcript variant 1, mRNA [NM_001831]	CGCTGAGAGGTTGACCAGGAAATACAACGAGCTGCTAAAGTCCTACCAGTGGAAGATGCT	ENST00000405140	1191	NM_001831	clusterin
A_23_P256413	0.00169191	0.0341264	4.5075	2.17233	4.5075	up	222.826	60.9815	308.169	80.9517	350.412	61.9875	0.975059	-1.20628	1.038	-0.975059	1.11016	-1.21243	Detected	CMTM7	Homo sapiens CKLF-like MARVEL transmembrane domain containing 7 (CMTM7), transcript variant 1, mRNA [NM_138410]	ATCTAGCTTGTCAGTCCGGTCTTAGAGATACCCTCTTTCCTGAAGTGAGGCGTGCCTGTA	ENST00000464689	112616	NM_138410	CKLF-like MARVEL transmembrane domain containing 7
A_24_P51909	0.00708962	0.0484881	4.05446	2.01951	4.05446	up	170.859	49.1557	180.927	59.4998	255.178	47.1306	1.16673	-0.942515	0.844461	-0.844461	1.22739	-1.03297	Detected	CPLX1	Homo sapiens complexin 1 (CPLX1), mRNA [NM_006651]	TCGTGTCTTTTAAAAACTCCTGTTTTCACACCTTACAAAGCCAGCTCTGAGCAGACAGGG	ENST00000304062	10815	NM_006651	complexin 1
A_23_P74359	0.00049857	0.031386	5.15096	2.36484	5.15096	up	5131.39	1150.36	5198.8	1120.86	6434.02	1134.41	1.42758	-1.04154	1.04154	-1.2565	1.23592	-1.09145	Detected	CSRP1	Homo sapiens cysteine and glycine-rich protein 1 (CSRP1), transcript variant 1, mRNA [NM_004078]	CCTGAAACATATATTGGCATTTATCAATGGCTCAAATCTTCATTTATCTCTGGCCTTAAC	ENST00000340006	1465	NM_004078	cysteine and glycine-rich protein 1
A_23_P102000	0.00113289	0.0325974	37.8437	5.24198	37.8437	up	228.269	6.25747	257.467	6.83122	265.456	7.8431	2.75254	-2.74833	2.52133	-2.79924	2.45225	-2.45225	Detected	CXCR4	Homo sapiens chemokine (C-X-C motif) receptor 4 (CXCR4), transcript variant 1, mRNA [NM_001008540]	TGCTGGTTTTTCAGTTTTCAGGAGTGGGTTGATTTCAGCACCTACAGTGTACAGTCTTGT	ENST00000241393	7852	NM_001008540	chemokine (C-X-C motif) receptor 4
A_23_P46429	0.000200534	0.0298991	13.7386	3.78016	13.7386	up	5506.54	503.363	6580.95	538.038	7955.66	478.112	1.95553	-1.80781	1.80781	-1.88918	1.96833	-1.91182	Detected	CYR61	Homo sapiens cysteine-rich, angiogenic inducer, 61 (CYR61), mRNA [NM_001554]	GGAGCACATGTTACTGCTTCATTTTGGAGCTTGTGGAGTTGATGACTTTCTGTTTTCTGT	ENST00000617517	3491	NM_001554	cysteine-rich, angiogenic inducer, 61
A_33_P3243028	0.00591115	0.0460218	4.61167	2.20529	4.61167	up	22.7727	4.84616	17.0939	4.50976	19.4036	4.10406	1.68148	-0.862781	0.862782	-1.14405	0.932456	-1.13233	Detected	DSPP	Homo sapiens dentin sialophosphoprotein (DSPP), mRNA [NM_014208]	ATAGTAGTGATAGCAGTGACAGCAGTGACAGCAGCGACAGCAGTGACAGCAGCGACAGCA	ENST00000282478	1834	NM_014208	dentin sialophosphoprotein
A_23_P110712	0.00049667	0.0313857	4.49061	2.16691	4.49061	up	3923.41	1158.74	5515.14	1248.73	5736.6	1103.34	1.03571	-1.03571	1.12213	-1.10528	1.06576	-1.13614	Detected	DUSP1	Homo sapiens dual specificity phosphatase 1 (DUSP1), mRNA [NM_004417]	TGTCTACTCCTAGAAGAACCAAATACCTCAATTTTTGTTTTTGAGTACTGTACTATCCTG	ENST00000239223	1843	NM_004417	dual specificity phosphatase 1
A_23_P214080	0.00183942	0.0347379	10.2217	3.35357	10.2217	up	37082.2	4551.6	45573.5	3956.46	43198.7	4420.88	1.81796	-1.52018	1.71056	-1.89982	1.52018	-1.59199	Detected	EGR1	Homo sapiens early growth response 1 (EGR1), mRNA [NM_001964]	AAACAAAGTGACTGTTTGGCTTATAAACACATTGAATGCGCTTTATTGCCCATGGGATAT	ENST00000239938	1958	NM_001964	early growth response 1
A_24_P398810	0.00170614	0.0341785	4.71945	2.23862	4.71945	up	1322.11	357.134	1657.09	329.513	1682.29	347.007	1.18531	-1.01486	1.10625	-1.30846	1.01486	-1.08612	Detected	EIF5	Homo sapiens eukaryotic translation initiation factor 5 (EIF5), transcript variant 1, mRNA [NM_001969]	AGGACAAGTTGTAAGCTTGGATTTTTAGGTCTAGCAATACACTGTTTACAAGAGCATCAC	ENST00000216554	1983	NM_001969	eukaryotic translation initiation factor 5
A_23_P205746	0.00248364	0.03682	4.34879	2.12061	4.34879	up	69.9497	19.0485	98.4413	21.7853	77.0197	18.0984	1.27571	-0.912796	1.36379	-0.896585	0.896585	-1.01637	Detected	EML1	Homo sapiens echinoderm microtubule associated protein like 1 (EML1), transcript variant 1, mRNA [NM_001008707]	GTTCTGATGCGTTAAACGGAGGTGGCAGAAATTTGTCAAGAAGGCCTTATCCATTTCGAT	ENST00000334192	2009	NM_001008707	echinoderm microtubule associated protein like 1
A_23_P51397	0.00115224	0.0326191	70.3109	6.13568	70.3109	up	223.127	3.07405	242.634	3.64252	231.97	3.75799	3.34767	-3.14577	3.06372	-3.07845	2.88571	-2.88571	Detected	ENAH	Homo sapiens enabled homolog (Drosophila) (ENAH), transcript variant 1, mRNA [NM_001008493]	CTTTTGATTTTGTTGGGTAAGTTAAATAGTCTGTAGTAGGTAGAGTACTGGGTACAAGTG	ENST00000358675	55740	NM_001008493	enabled homolog (Drosophila)
A_24_P257579	0.00673939	0.0478252	5.02958	2.33044	5.02958	up	34.9515	7.58995	27.3288	7.52064	39.2681	6.01507	1.63743	-0.877627	0.877627	-1.06834	1.2874	-1.2429	Detected	EPB41L4A	Homo sapiens erythrocyte membrane protein band 4.1 like 4A (EPB41L4A), mRNA [NM_022140]	TAGAGAACACCGGAAAAAGAGAAACAGAATACGGCAGGAGAATGATATGGTTGATTCAGC	ENST00000515047	64097	NM_022140	erythrocyte membrane protein band 4.1 like 4A
A_23_P140675	0.00179478	0.0345911	8.65469	3.11348	8.65469	up	1991.4	262.568	2254.28	331.603	2679.66	248.218	1.65079	-1.5841	1.4248	-1.4248	1.56102	-1.69494	Detected	EPB42	Homo sapiens erythrocyte membrane protein band 4.2 (EPB42), transcript variant 1, mRNA [NM_000119]	AACATGTTCCAGAACCTAACCAACTATAAAAGCGTCACCGTGGTAGCCCCTGAACTATCA	ENST00000567019	2038	NM_000119	erythrocyte membrane protein band 4.2
A_19_P00319398	0.00538958	0.0447577	15.0539	3.91206	15.0539	up	194.846	12.2919	202.48	21.0836	243.809	12.6712	2.02345	-2.27496	1.67403	-1.67403	1.82883	-2.26089	Detected	ERVMER34-1	Homo sapiens endogenous retrovirus group MER34, member 1 (ERVMER34-1), transcript variant 1, mRNA [NM_024534]	CCTTGCTGTTCAGAGAGCTACTCTTTGTAGTGTTCTTGCATGCATATATAATAAATGTTT	ENST00000440542	100288413	NM_024534	endogenous retrovirus group MER34, member 1
A_24_P247026	0.0013124	0.0332716	6.70257	2.74471	6.70257	up	68.3323	13.5602	98.4107	16.6782	114.435	13.161	1.26197	-1.38308	1.38335	-1.26197	1.48783	-1.45595	Detected	FAM154B	Homo sapiens family with sequence similarity 154, member B (FAM154B), mRNA [NM_001008226]	ACAGTATTTGCAGAAAGGAAAAAGTATTATTTGCTAGGGTAGTTTTAGGAAGACTGACAG	ENST00000339465	283726	NM_001008226	family with sequence similarity 154, member B
A_24_P323941	0.00523651	0.0443464	4.75034	2.24803	4.75034	up	530.863	125.306	573.238	112.99	591.046	138.024	1.32407	-1.07067	1.03	-1.39741	0.96097	-0.96097	Detected	FAM209A	Homo sapiens family with sequence similarity 209, member A (FAM209A), mRNA [NM_001012971]	ACGATCTGTGAAATATGGGGAGAAGAAAGCTCTAGCTGAATGGATTTGTGTGTCAGGAGA	ENST00000371328	200232	NM_001012971	family with sequence similarity 209, member A
A_24_P92451	0.00565832	0.045193	75.3671	6.23586	75.3671	up	313.862	2.70207	245.154	5.09033	235.954	3.59104	3.68261	-3.48918	2.9213	-2.75295	2.75295	-3.1086	Detected	FAM230B	Homo sapiens family with sequence similarity 230, member B (non-protein coding) (FAM230B), long non-coding RNA [NR_108107]	AGGGCGCTTTATACGACATTGCTAATGGCACCGACAAGGCACGCTAACGTGGACGCTGTA	ENST00000451257	642633	NR_108107	family with sequence similarity 230, member B (non-protein coding)
A_33_P3253131	0.00254304	0.0370692	6.27609	2.64987	6.27609	up	17.3626	3.04653	17.8769	3.62552	31.6502	4.19031	1.37762	-1.44499	1.01486	-1.37145	1.72581	-1.01486	Detected	FAM230B	Homo sapiens family with sequence similarity 230, member B (non-protein coding) (FAM230B), long non-coding RNA [NR_108107]	TGAGGACGCTCTATACGACATCACTAATGAGGACGCTGTATACAACATCGCTAATGAGGA	ENST00000619172	642633	NR_108107	family with sequence similarity 230, member B (non-protein coding)
A_33_P3387548	0.00114859	0.0326191	8.03028	3.00545	8.03028	up	18.7046	3.05727	33.8445	3.88358	30.2043	3.62201	1.35508	-1.56987	1.80574	-1.40219	1.5284	-1.35508	Detected	FAM230C	Homo sapiens family with sequence similarity 230, member C (FAM230C), long non-coding RNA [NR_027278]	CTAGATTTTCTCGAGACCAAGTAAATGAGATAGAATCTTTATGTTGGCAGCTAAGTTAGA	ENST00000416405	26080	NR_027278	family with sequence similarity 230, member C
A_23_P150693	0.00412129	0.0411876	5.0978	2.34987	5.0978	up	275.998	68.5776	331.623	81.8151	395.22	56.6799	1.19177	-1.12895	1.05179	-1.05179	1.19173	-1.43361	Detected	FJX1	Homo sapiens four jointed box 1 (Drosophila) (FJX1), mRNA [NM_014344]	ACTCATTCCTGACCTCTTGTCATTTTGGCCTGAAGGCTACAAATTCAGGGTCAGCTGTAT	ENST00000317811	24147	NM_014344	four jointed box 1 (Drosophila)
A_23_P106194	0.000519809	0.0318703	23.9978	4.58483	23.9978	up	5664.73	299.853	7319.83	361.889	8459.39	272.41	2.24639	-2.30515	2.21133	-2.21133	2.3069	-2.47338	Detected	FOS	Homo sapiens FBJ murine osteosarcoma viral oncogene homolog (FOS), mRNA [NM_005252]	AGAGGGTTCCTGTAGACCTAGGGAGGACCTTATCTGTGCGTGAAACACACCAGGCTGTGG	ENST00000303562	2353	NM_005252	FBJ murine osteosarcoma viral oncogene homolog
A_32_P34920	0.00353075	0.0400246	12.1839	3.6069	12.1839	up	472.225	62.3699	739.63	49.8095	690.706	50.005	1.61621	-1.61621	1.85867	-2.11811	1.64677	-1.96475	Detected	FOXD1	Homo sapiens forkhead box D1 (FOXD1), mRNA [NM_004472]	CTCCCTTGACGTTTGGCAGATGAAAAACAACTAAGCCTTTTTGAGGTGTAGAGATTCTCA	ENST00000615637	2297	NM_004472	forkhead box D1
A_24_P330303	0.00345051	0.0397456	7.94281	2.98965	7.94281	up	43.7434	5.69962	64.0879	10.7884	40.8909	4.33305	1.56212	-1.68987	1.70824	-0.946801	0.946801	-2.11511	Detected	FRMD6	Homo sapiens FERM domain containing 6 (FRMD6), transcript variant 1, mRNA [NM_001042481]	TTGCAGATATTGGAATGTATGGAAGTATCTCAGTCTCTGCATAAGAGGATTAAAGTATGA	ENST00000557522	122786	NM_001042481	FERM domain containing 6
A_24_P239606	0.000348905	0.0298991	6.11235	2.61173	6.11235	up	3792.73	720.005	3731.82	666.491	5366.38	807.241	1.50101	-1.20802	1.07278	-1.49691	1.48368	-1.07278	Detected	GADD45B	Homo sapiens growth arrest and DNA-damage-inducible, beta (GADD45B), mRNA [NM_015675]	TGAGAGCGAGATGGGAAGCATAGATATCTATATTTTTATTTCTACTATGAGGGCCTTGTA	ENST00000592937	4616	NM_015675	growth arrest and DNA-damage-inducible, beta
A_33_P3423969	0.000471922	0.0312935	9.06818	3.18081	9.06818	up	158.294	19.8561	180.858	22.858	258.505	25.4674	1.59506	-1.71176	1.38245	-1.68611	1.78461	-1.38245	Detected	GBX2	Homo sapiens gastrulation brain homeobox 2 (GBX2), transcript variant 2, mRNA [NM_001301687]	GCTTACAGCCACACCAGAAGACACGCTAAATATTTATTATACTATCCTACTTTGTACATA	ENST00000306318	2637	NM_001301687	gastrulation brain homeobox 2
A_33_P3422659	8.39263e-05	0.0285211	4.81525	2.26761	4.81525	up	21.7426	5.46112	14.7227	3.24924	18.422	3.46672	1.63623	-0.668886	0.668886	-1.59545	0.879104	-1.35427	Detected	GDAP1	Homo sapiens ganglioside induced differentiation associated protein 1 (GDAP1), transcript variant 1, mRNA [NM_018972]	CTTCATTTAAATATGCACGGTTAAAATGAATAGCGGCCTAAAGAATAACACTGATCTCTC		54332	NM_018972	ganglioside induced differentiation associated protein 1
A_23_P209246	0.000857601	0.0322856	15.113	3.91772	15.113	up	78.2652	6.77039	524.879	31.4981	130.759	8.4987	0.90122	-2.9417	3.2419	-0.90122	1.12366	-2.64346	Detected	GLI2	Homo sapiens GLI family zinc finger 2 (GLI2), mRNA [NM_005270]	ACTCAGAGTGTGACTCTGACTGTGACCTTGGCCTTAATGAGGAACTTCTTAGGAGAGTTT	ENST00000361492	2736	NM_005270	GLI family zinc finger 2
A_33_P3211263	0.000677763	0.0319891	4.05891	2.02109	4.05891	up	3074.54	994.487	3376.87	823.733	3526.37	778.415	1.13021	-0.809995	0.860665	-1.25924	0.809995	-1.19317	Detected	GPATCH4	Homo sapiens G patch domain containing 4 (GPATCH4), transcript variant 2, mRNA [NM_182679]	GAAAGAGCTGGAGTCAGCACTGTCCAGAAAGCCAAAAAGAAACAGAAGAAGAGAGACTAA	ENST00000368232	54865	NM_182679	G patch domain containing 4
A_23_P158925	0.00277959	0.0378713	12.3111	3.62189	12.3111	up	36.7283	2.86339	36.8899	3.8221	47.6782	3.68431	2.02879	-1.96417	1.63026	-1.725	1.8872	-1.63026	Detected	GPR125	Homo sapiens G protein-coupled receptor 125 (GPR125), mRNA [NM_145290]	GTTGTCAAAGCACCAACAGGACATTTTGGGATGTGAAATGTAATTTCTTGGAATCTGTAA	ENST00000499527	166647	NM_145290	G protein-coupled receptor 125
A_24_P299355	2.1597e-05	0.0285211	7.84339	2.97148	7.84339	up	116.339	18.5864	498.155	66.0655	179.194	20.4144	0.652851	-2.30503	2.34624	-0.652851	0.758004	-2.19945	Detected	GRAPL	Homo sapiens GRB2-related adaptor protein-like (GRAPL), mRNA [NM_001129778]	AATCCGGTTGCTGCTGCAGAGACCAAGTTTCCAAGGCCTTGTCAAGTGGGCTGTGCCAGA	ENST00000344415	400581	NM_001129778	GRB2-related adaptor protein-like
A_33_P3300800	0.000286819	0.0298991	4.95143	2.30785	4.95143	up	127.423	33.5534	169.631	34.7482	133.15	23.683	1.34578	-0.891175	1.35369	-1.01817	0.891175	-1.42354	Detected	GUCY2EP	Homo sapiens guanylate cyclase 2E, pseudogene (GUCY2EP), non-coding RNA [NR_024042]	TGGCTGAAGCTCGGAAAATGGGGGCAACTGTGGAACCAGGGTATTTTGACCAGGTTACCA	ENST00000526984	390226	NR_024042	guanylate cyclase 2E, pseudogene
A_24_P142305	0.00470907	0.0428555	6.12286	2.61421	6.12286	up	41614.3	8539.62	51315.1	10960.7	63509.7	7351.72	1.25832	-1.33838	1.15575	-1.15575	1.35018	-1.58423	Detected	HBA2	Homo sapiens hemoglobin, alpha 2 (HBA2), mRNA [NM_000517]	CACAGACTCAGAGAGAACCCACCATGGTGCTGTCTCCTGCCGACAAGACCAACGTCAAGG	ENST00000251595	3040	NM_000517	hemoglobin, alpha 2
A_23_P203558	0.00145329	0.033597	4.07618	2.02722	4.07618	up	357.229	99.3867	440.921	114.138	416.729	99.5049	1.21559	-0.942002	1.11439	-0.919812	0.919812	-0.970047	Detected	HBB	Homo sapiens hemoglobin, beta (HBB), mRNA [NM_000518]	GTCCAACTACTAAACTGGGGGATATTATGAAGGGCCTTGAGCATCTGGATTCTGCCTAAT	ENST00000335295	3043	NM_000518	hemoglobin, beta
A_24_P732099	0.00168647	0.0341238	5.56017	2.47513	5.56017	up	48276.9	10099.8	60615.4	10713.4	58189.1	10662.5	1.38451	-1.18436	1.308	-1.27674	1.13589	-1.13589	Detected	HBBP1	Homo sapiens hemoglobin, beta pseudogene 1 (HBBP1), non-coding RNA [NR_001589]	TATGGTCCACTATGTTTGTACCTATGTCCCAAAATCTCATCTCCTTTAGATGGGGGAGGT	ENST00000454892	3044	NR_001589	hemoglobin, beta pseudogene 1
A_33_P3252534	0.00282394	0.0379073	6.6638	2.73635	6.6638	up	66979.4	12276.2	73257	13989.6	98045.3	11025.1	1.51215	-1.24756	1.23654	-1.23654	1.54385	-1.43239	Detected	HBZ	Homo sapiens hemoglobin, zeta (HBZ), mRNA [NM_005332]	TCTGACCAAGACTTAGGGGACCATCATTGTGTCCATGTGGGCCAAGATCTCCACGCAGGC	ENST00000354915	3050	NM_005332	hemoglobin, zeta
A_33_P3269924	0.00694129	0.0482195	10.2678	3.36006	10.2678	up	31.3054	2.72146	33.236	3.37893	28.3829	3.45519	2.09031	-1.74551	1.77178	-1.6108	1.43089	-1.43089	Detected	HIP1R	Homo sapiens huntingtin interacting protein 1 related (HIP1R), transcript variant 3, mRNA [NM_001303099]	AGAGGGGAGAGTGTCATTGTGTGCCTTTTGACACATACATTAAGACCAAAAAGGAAAAAA	ENST00000535831	9026	NM_001303099	huntingtin interacting protein 1 related
A_23_P70448	0.00628494	0.0469335	10.2633	3.35942	10.2633	up	283.131	24.3773	221.419	23.8359	206.091	23.9548	2.41297	-1.43675	1.65342	-1.64663	1.43675	-1.49174	Detected	HIST1H1A	Homo sapiens histone cluster 1, H1a (HIST1H1A), mRNA [NM_005325]	CTGCTAAAGCTAAGGCTGTAAAACCCAAGGCGGCCAAGGCTAGGGTGACGAAGCCAAAGA	ENST00000244573	3024	NM_005325	histone cluster 1, H1a
A_23_P111132	0.00121333	0.0329283	4.19393	2.0683	4.19393	up	69003	21322.7	93689.8	25065	107439	20518.7	0.97516	-1.03097	1.01153	-0.97516	1.09591	-1.11618	Detected	HSPA1A	Homo sapiens heat shock 70kDa protein 1A (HSPA1A), mRNA [NM_005345]	GAGCTTCAAGACTTTGCATTTCCTAGTATTTCTGTTTGTCAGTTCTCAATTTCCTGTGTT	ENST00000375651	3303	NM_005345	heat shock 70kDa protein 1A
A_33_P3348752	0.000677655	0.0319891	7.55429	2.9173	7.55429	up	7064.83	1049.27	8180.02	1177.07	10001.5	1264.31	1.50867	-1.55446	1.31526	-1.56611	1.49213	-1.31526	Detected	HSPH1	Homo sapiens heat shock 105kDa/110kDa protein 1 (HSPH1), transcript variant 1, mRNA [NM_006644]	GATAAAAAGGAAGAAGATTTAGAAGACAAAAACAATTTTGGTGCTGAACCTCCACATCAG	ENST00000602786	10808	NM_006644	heat shock 105kDa/110kDa protein 1
A_23_P88119	0.00235391	0.0365542	6.31219	2.65814	6.31219	up	19863.9	3519.35	22866.5	3567.32	25343.4	4246.08	1.38467	-1.42396	1.1829	-1.5819	1.2181	-1.1829	Detected	HSPH1	Homo sapiens heat shock 105kDa/110kDa protein 1 (HSPH1), transcript variant 1, mRNA [NM_006644]	TGTGGAATGGAAGAAATGTCGATCCTGTTGTAACTGATTGTGAACACTTTTATGAGCTTT	ENST00000602786	10808	NM_006644	heat shock 105kDa/110kDa protein 1
A_33_P3358601	0.00334192	0.0394607	4.54192	2.1833	4.54192	up	83.1402	23.1474	132.686	26.3865	120.979	27.161	0.977815	-1.17874	1.24735	-1.16726	1.00093	-0.977815	Detected	IFITM10	Homo sapiens interferon induced transmembrane protein 10 (IFITM10), mRNA [NM_001170820]	GATTTTGCACAGTGCCTGGCAGACATTTGACATTCAATAAACATTGTACGAACGAAAGAA	ENST00000382123	402778	NM_001170820	interferon induced transmembrane protein 10
A_23_P42868	0.00528194	0.0444725	4.27087	2.09453	4.27087	up	18.3547	5.45334	58.2165	17.1568	21.0858	3.6003	0.452307	-1.61049	1.71272	-0.134395	0.134395	-2.23928	Detected	IGFBP1	Homo sapiens insulin-like growth factor binding protein 1 (IGFBP1), mRNA [NM_000596]	TTTCTGCTCTTCCAAAGCTCCTGCGTCTGTTTTTAAAGAGCATGGAAAAATACTGCCTAG	ENST00000275525	3484	NM_000596	insulin-like growth factor binding protein 1
A_23_P251031	0.00119614	0.0328252	15.318	3.93715	15.318	up	40.8479	2.78882	46.8363	3.29691	55.1906	3.72126	2.00276	-2.18164	1.79526	-2.11765	1.91889	-1.79526	Detected	IL13	Homo sapiens interleukin 13 (IL13), mRNA [NM_002188]	GGACATTGAACAAGTTGTTTCATTGACTATCAAACTGAAGCCAGAAATAAAGTTGGTGAC	ENST00000617259	3596	NM_002188	interleukin 13
A_23_P5654	0.00320195	0.0387754	11.0767	3.46945	11.0767	up	343.221	50.2038	754.517	60.0768	544.429	40.0603	1.5018	-1.58333	2.23335	-1.5018	1.64937	-1.93872	Detected	IL37	Homo sapiens interleukin 37 (IL37), transcript variant 1, mRNA [NM_014439]	GGATGGTTCATCTGCACCTCCTGCAATTGTAATGAGCCTGTTGGGGTGACAGATAAATTT	ENST00000263326	27178	NM_014439	interleukin 37
A_21_P0000120	0.00221217	0.0360957	6.47235	2.69429	6.47235	up	178.193	28.8601	213.833	36.539	206.501	32.0517	1.5403	-1.39786	1.39848	-1.23497	1.23497	-1.27629	Detected	KCNJ18	Homo sapiens potassium channel, inwardly rectifying subfamily J, member 18 (KCNJ18), mRNA [NM_001194958]	GGAGAAACACCGGGTTTCAGCTTTCTCGACCTTAGCTTGGGTGAGACTGTTTACAAAAAA	ENST00000567955	100134444	NM_001194958	potassium channel, inwardly rectifying subfamily J, member 18
A_33_P3240507	0.00280302	0.0378849	10.022	3.32509	10.022	up	161.938	22.4847	116.153	9.62427	185.963	18.7023	2.02229	-1.138	1.138	-2.53967	1.70383	-1.43349	Detected	KCTD12	Homo sapiens potassium channel tetramerization domain containing 12 (KCTD12), mRNA [NM_138444]	CAGAGGCATGCATTTACATATGTTGCCCTAATTACCATTTGATGATCATAAATACAAGTG	ENST00000377474	115207	NM_138444	potassium channel tetramerization domain containing 12
A_23_P130974	0.00135042	0.0332716	5.06743	2.34125	5.06743	up	410.917	91.8916	538.514	126.078	489.402	83.6644	1.22986	-1.24284	1.21513	-0.964	0.964	-1.40792	Detected	KIAA1683	Homo sapiens KIAA1683 (KIAA1683), transcript variant 2, mRNA [NM_025249]	GCTCCCTGCAGTGGGGACTTCGTGGGAGGCACTCATGGCTCTCTGGGTCTAATGAATAAA	ENST00000599638	80726	NM_025249	KIAA1683
A_24_P62800	0.00283197	0.0379656	15.6728	3.97019	15.6728	up	79.6141	8.15962	98.5147	5.18808	141.545	7.93367	1.84793	-1.75038	1.75038	-2.58115	2.16006	-1.82066	Detected	KLHDC8A	Homo sapiens kelch domain containing 8A (KLHDC8A), transcript variant 2, mRNA [NM_018203]	GAAACCCTCTCATTTACACTGTGGCATCAAAATCCACAAAAGATGGATTAATTGCACTCT	ENST00000367156	55220	NM_018203	kelch domain containing 8A
A_21_P0005609	0.0012964	0.0332716	5.29076	2.40348	5.29076	up	604.662	134.665	818.19	153.242	755.704	142.474	1.3117	-1.16692	1.34314	-1.15795	1.11536	-1.11536	Detected	KMT2E-AS1	Homo sapiens KMT2E antisense RNA 1 (head to head) (KMT2E-AS1), long non-coding RNA [NR_024586]	AAGAATAAAAGAAGGGTTTCCCCACTAAAATGACACGGCGATTCCGGCTCTTGTTTTGGG		100216545		KMT2E antisense RNA 1 (head to head)
A_21_P0005548	0.00430887	0.041687	12.9834	3.69859	12.9834	up	44.6123	3.04391	61.11	5.98021	52.1757	4.15843	1.8403	-2.34501	1.8894	-1.54821	1.54821	-1.92465	Detected	lnc-AC099552.4.1-3	LNCipedia lincRNA (lnc-AC099552.4.1-3), lincRNA [lnc-AC099552.4.1-3:1]	GTCATAAAAACAACACATTCCAAATGCACTGTCATGGGCTTGGAAGGAAAATAATAAAGA				lnc-AC099552.4.1-3:1
A_21_P0006454	0.00313781	0.038498	4.03977	2.01427	4.03977	up	439.078	123.769	455.74	111.498	540.527	138.462	1.17887	-0.959817	0.827738	-1.28792	0.960728	-0.827738	Detected	lnc-ACRC-1	Homo sapiens cDNA FLJ46446 fis, clone THYMU3017689. [AK128305]	TAATGGACTTTTCTTAAAAATGGACAGTATCCCTAAGAATACCCCGTACATTTCCATTGC				lnc-ACRC-1:1
A_21_P0006383	0.00166482	0.0340861	4.37848	2.13043	4.37848	up	301.449	76.1761	338.179	89.5234	353.268	73.2729	1.26505	-1.03132	1.02606	-0.975863	0.975863	-1.11714	Detected	lnc-CDK20-4	LNCipedia lincRNA (lnc-CDK20-4), lincRNA [lnc-CDK20-4:2]	AAAGCCATCCTCTCATTAAAGTAATTGGTCCGGCATATACTAAGCGTCAGGCACTTTTTT				lnc-CDK20-4:2
A_21_P0003604	0.00581472	0.0457608	7.26757	2.86147	7.26757	up	24.448	3.29551	33.7928	6.54469	39.2929	4.56673	1.19533	-2.00768	1.25746	-1.19533	1.36184	-1.56678	Detected	lnc-DCAF4L1-1	LNCipedia lincRNA (lnc-DCAF4L1-1), lincRNA [lnc-DCAF4L1-1:1]	TATGGGGAACGTTTCCAATTTCTTCTATGGAGAAATGGGAAGAGATGGTGGATGAAGGAA				lnc-DCAF4L1-1:1
A_21_P0006936	0.00108286	0.0322887	4.94529	2.30605	4.94529	up	55.9944	13.4872	133.248	31.7165	76.0411	12.7724	0.69296	-1.67259	1.53885	-0.616423	0.616423	-1.78092	Detected	lnc-GLRX3-3	LNCipedia lincRNA (lnc-GLRX3-3), lincRNA [lnc-GLRX3-3:2]	TAAAGGACTGCGAGGTTCCACTGCCCAGGGCTGTCTAACCGCTTGCTTTAGACTGTGGGT				lnc-GLRX3-3:2
A_21_P0005014	0.00414856	0.0413017	12.5695	3.65185	12.5695	up	89.3704	9.25803	92.5979	5.76275	100.914	9.18022	1.96828	-1.6146	1.6146	-2.47602	1.62551	-1.65654	Detected	lnc-HIST1H1A-1	LNCipedia lincRNA (lnc-HIST1H1A-1), lincRNA [lnc-HIST1H1A-1:1]	CAACATCTTGAGCATAAAACCAACTGATACAATGATGTACAAGTCAGATGATTCTGATGA				lnc-HIST1H1A-1:1
A_21_P0009632	0.0039495	0.0409398	5.23166	2.38727	5.23166	up	158.272	45.6632	556.659	96.0707	268.96	43.9348	0.604785	-1.50038	2.01431	-0.604785	0.85174	-1.58581	Detected	lnc-LMAN1-1	LNCipedia lincRNA (lnc-LMAN1-1), lincRNA [lnc-LMAN1-1:1]	AAAGCCTTGATGGTCCAGCCCTCGACTCTCCTTCAAAATTGAAGGAAGAAATGATGTGGA				lnc-LMAN1-1:1
A_21_P0004689	0.00139621	0.0332903	8.32214	3.05696	8.32214	up	47.8914	8.22078	38.3714	4.85641	127.721	11.8795	1.53876	-1.31553	0.814157	-2.25238	2.43588	-0.814157	Detected	lnc-MYB-1	BY994446 full-length enriched Human Mast Cell cDNA library Homo sapiens cDNA clone MCN0796 5', mRNA sequence [BY994446]	TACATGATAGAGTGGAAGCCACAAAGGAAGAAGAAGAAGAGATTCTATCTGGGTATGGAG				lnc-MYB-1:1
A_21_P0003016	0.000126655	0.0298991	4.14291	2.05064	4.14291	up	23.8881	7.36457	15.1163	3.86209	19.0767	3.96688	1.53727	-0.472217	0.472217	-1.58091	0.694748	-1.39457	Detected	lnc-NR1I2-1	LNCipedia lincRNA (lnc-NR1I2-1), lincRNA [lnc-NR1I2-1:10]	ACTTTACCACATTGATGAAAAAGTATTGAGCAGCCACAGGTACATGACATTCCACTATGT				lnc-NR1I2-1:10
A_33_P3281651	0.00677017	0.0478305	4.82766	2.27132	4.82766	up	11.9102	2.66979	12.4019	3.5336	21.6653	3.51131	1.22511	-1.24414	0.878622	-1.0172	1.57027	-0.878622	Detected	lnc-TRAPPC6B-1	LNCipedia lincRNA (lnc-TRAPPC6B-1), lincRNA [lnc-TRAPPC6B-1:1]	CTAGGCCTTTTAACCTATGATGTAATGTGCCTTACACCGTTTTAACGTGATCACATCAGA				lnc-TRAPPC6B-1:1
A_21_P0014760	0.00100384	0.0322856	10.6149	3.40802	10.6149	up	384.081	39.3625	421.277	42.2719	493.448	46.7249	1.82614	-1.77224	1.55463	-1.84684	1.66959	-1.55463	Detected	LOC100506557	PREDICTED: Homo sapiens uncharacterized LOC100506557 (LOC100506557), misc_RNA [XR_132524]	CCAGCCATTGTTTAGGAACAAAGGTATAATCAGATCCTCATTTTCTATTCCAATAAAGTC		100506557	XR_132524	uncharacterized LOC100506557
A_21_P0013499	0.00347287	0.0398348	4.25851	2.09035	4.25851	up	26.8252	9.26914	36.3104	8.16423	27.5083	5.33966	1.16335	-0.681595	1.19528	-1.04219	0.681594	-1.50704	Detected	LOC101926977	PREDICTED: Homo sapiens uncharacterized LOC101926977 (LOC101926977), ncRNA [XR_242405]	CCAAGGGTTTGCTGTGACACTTCCACATCATTCTTCAGTATGTAGTCCAGAGATTAGCTA	ENST00000523011	101926977	XR_242405	uncharacterized LOC101926977
A_21_P0001230	0.00570345	0.0453561	7.09638	2.82708	7.09638	up	117.96	15.4008	454.466	75.0788	169.388	25.5948	0.570578	-2.67851	2.11159	-0.570578	0.574576	-1.97542	Detected	LOC101927143	Homo sapiens uncharacterized LOC101927143 (LOC101927143), long non-coding RNA [NR_110669]	TTGTACATGAAGATAAAAATGCTCAGGTGTGCCCAGGTTGAAGAAGATGAAAGGCCCTGC		101927143		uncharacterized LOC101927143
A_21_P0008557	0.00619968	0.0468014	8.80357	3.13809	8.80357	up	25.8908	2.69427	29.0402	3.53921	26.5367	3.57167	1.84094	-1.7354	1.60169	-1.51934	1.35845	-1.35845	Detected	LOC101928907	PREDICTED: Homo sapiens uncharacterized LOC101928907 (LOC101928907), ncRNA [XR_243166]	CTCTAAGATTCGCTTTTAATTCACTAGCCACTAACCAGTTACCTATCTCATTACAGATAT		101928907	XR_243166	uncharacterized LOC101928907
A_21_P0004106	0.00279957	0.0378849	14.3844	3.84643	14.3844	up	48.2441	3.17027	53.4314	4.81809	66.3248	4.38001	2.03025	-2.20929	1.77272	-1.78291	1.97141	-1.77272	Detected	LOC101929505	Homo sapiens uncharacterized LOC101929505 (LOC101929505), long non-coding RNA [NR_104625]	TACGCAGAAATTTACCAGTGGCTGAAGTGGGTAATAGGGATGTATCAATTAACTAATAAA	ENST00000513157	101929505		uncharacterized LOC101929505
A_21_P0004459	0.00359007	0.0401852	4.39	2.13422	4.39	up	70.3388	23.0659	82.4508	20.1325	95.651	16.4446	1.04804	-0.872385	0.872385	-1.24609	0.973462	-1.3903	Detected	LOC102546298	Homo sapiens uncharacterized LOC102546298 (LOC102546298), long non-coding RNA [NR_105061]	AATGCTCACACAGAGAAGATGACAGCTTCTACAAATAAATGTCAATCAGTTCATTTCCCC		102546298		uncharacterized LOC102546298
A_21_P0013440	0.00376046	0.0404818	4.55085	2.18614	4.55085	up	539.574	152.242	1411.44	378.949	1006.49	164.184	0.499575	-1.63774	1.48199	-0.499575	0.880975	-1.55856	Detected	LOC102725415	Homo sapiens cDNA clone IMAGE:5278284. [BC037920]	CCTCTCTACTGAATCTGCTGAAGATCATGCAGCTGCTGTTCCTGCCTCTAAAACCCTCTC	ENST00000449307	102725415		uncharacterized LOC102725415
A_21_P0014363	0.00061475	0.0319891	4.03342	2.012	4.03342	up	107.817	34.6637	115.54	28.3677	112.072	25.2001	1.20558	-0.743377	0.90052	-1.21003	0.743377	-1.23313	Detected	LOC104968399	Homo sapiens (LOC104968399), transcript variant 3, long non-coding RNA [NR_130145]	CACATTCAGCTTCTGATCTCTTGATAAGAGAGACTAAACCTATGCCTAAACAAAGTAATA		104968399	NR_130145	ncRNA
A_33_P3396050	0.00109193	0.0322887	6.06148	2.59967	6.06148	up	32.1282	5.86489	43.2725	8.23857	41.5749	6.25584	1.29944	-1.46609	1.32418	-1.15327	1.15327	-1.40275	Detected	LOC440386	PREDICTED: Homo sapiens uncharacterized LOC440386 (LOC440386), misc_RNA [XR_248227]	TTTTCCTCATGAACCATTTGGTTCAAGCCATTTCCAGGCACATGAATTGGGGAGAAACCC	ENST00000563701	440386	XR_248227	uncharacterized LOC440386
A_21_P0013426	0.00438968	0.041935	6.24037	2.64163	6.24037	up	223.937	48.1157	190.653	25.5196	197.198	32.8612	1.61593	-0.914448	0.978921	-2.00682	0.914448	-1.49433	Detected	LOC650226	Homo sapiens ankyrin repeat domain 26 pseudogene (LOC650226), non-coding RNA [NR_029420]	AGGAAAGAATTTGGATCAGGTTGTGCAGAAGCGAAGCGATACCCACAAGCAACTTTCTGA	ENST00000422212	650226	NR_029420	ankyrin repeat domain 26 pseudogene
A_32_P46840	0.00266671	0.0375469	7.04866	2.81735	7.04866	up	425.03	66.5368	532.232	97.8966	594.916	68.7118	1.34397	-1.64323	1.2636	-1.2636	1.31106	-1.62659	Detected	LOC729680	Homo sapiens cDNA FLJ33345 fis, clone BRACE2003713. [AK090664]	CATCTCTTGGTCTATGACGACGATGTTGGAGAGTTCCTACTCCGTGATAACTCAGTTCTA		729680	AK090664	uncharacterized LOC729680
A_33_P3267607	0.00743279	0.0494728	5.05498	2.33771	5.05498	up	19.4055	4.08847	22.4476	4.14528	20.2707	4.69781	1.42157	-1.13713	1.2268	-1.29469	0.966464	-0.966464	Detected	LOC729870	PREDICTED: Homo sapiens uncharacterized LOC729870 (LOC729870), misc_RNA [XR_244739]	CCTGAAGCTTGTATAACTCCTGGGGGAACTTCTTAAAGGAAAGCAATAAAAACTTACAAA		729870	XR_244739	uncharacterized LOC729870
A_23_P19657	0.00365059	0.0402213	4.10062	2.03584	4.10062	up	157.925	53.0599	202.242	55.8186	254.07	46.2792	0.966719	-0.918694	0.918694	-1.02304	1.13467	-1.14571	Detected	LRP11	Homo sapiens low density lipoprotein receptor-related protein 11 (LRP11), mRNA [NM_032832]	AAACCCCAGACTTTGAATTAGTAACAGCTCTAAGATGGTCATGCAGTGAGATAGGAAATC	ENST00000239367	84918	NM_032832	low density lipoprotein receptor-related protein 11
A_23_P391228	0.00548044	0.0448648	8.64356	3.11163	8.64356	up	283.176	31.4881	348.384	57.4198	417.956	41.1304	1.44865	-2.03203	1.34277	-1.34277	1.49227	-1.6764	Detected	MANEAL	Homo sapiens mannosidase, endo-alpha-like (MANEAL), transcript variant 1, mRNA [NM_001031740]	CTCCAGAGCCTAATTTTTCCCAGATGCATATTTAGCTCTAGGGAGAGGACTAGGAGGAAA	ENST00000373045	149175	NM_001031740	mannosidase, endo-alpha-like
A_23_P108492	0.00303649	0.0383071	5.25539	2.3938	5.25539	up	25.3423	6.28902	48.1097	11.0333	55.695	7.85225	0.844508	-1.478	1.36442	-0.844509	1.46247	-1.18749	Detected	MARS2	Homo sapiens methionyl-tRNA synthetase 2, mitochondrial (MARS2), mRNA [NM_138395]	CAGGAAAGTTATACTTGTATTTTCTTAAGTGTGGAATCAAATGAGCACATAAGCTGTGTC	ENST00000282276	92935	NM_138395	methionyl-tRNA synthetase 2, mitochondrial
A_32_P167396	0.00537459	0.0447099	4.44339	2.15166	4.44339	up	90.3648	28.4178	98.6923	26.051	130.06	20.8003	1.12926	-0.851571	0.851571	-1.1545	1.13657	-1.33152	Detected	MED14OS	Homo sapiens MED14 opposite strand (MED14OS), mRNA [NM_001289773]	TTAAGAGCTGAGAAAATATCATGCTGCTAGTTCTGAAACGATCTGAAGTGTGAATCAGGT		100873985	NM_001289773	MED14 opposite strand
A_23_P54840	0.00400707	0.0410416	8.28446	3.05041	8.28446	up	239687	27848.3	234302	31609.8	273184	35699.7	1.76322	-1.65413	1.32557	-1.64882	1.43391	-1.32557	Detected	MT1A	Homo sapiens metallothionein 1A (MT1A), mRNA [NM_005946]	AAATGCAACTCCTGCAAGAAGAGCTGCTGCTCCTGCTGCCCCATGAGCTGTGCCAAGTGT	ENST00000290705	4489	NM_005946	metallothionein 1A
A_23_P37983	0.000575506	0.0319891	17.4527	4.12538	17.4527	up	150622	9627.12	160427	11077.6	184116	9139.6	2.28422	-1.99533	1.97034	-1.97034	2.05586	-2.10006	Detected	MT1B	Homo sapiens metallothionein 1B (MT1B), mRNA [NM_005947]	TCATCAGAGAAGTGCCGCTGCTGTGCCTGATGTTGGGAGAGCCCTGCTCCCAGACATAAA	ENST00000334346	4490	NM_005947	metallothionein 1B
A_33_P3780505	0.000194684	0.0298991	619.795	9.27565	619.795	up	1444.02	2.65251	1581.67	3.2375	2673.59	3.47838	4.6563	-4.74408	4.38279	-4.63403	5.02695	-4.38279	Detected	MT1DP	Homo sapiens metallothionein 1D, pseudogene (functional) (MT1DP), transcript variant 1, non-coding RNA [NR_003658]	CCCATTTACTATGTCTGTTTTCTTAAATGAAATATGGGAATGATAATAAACATTGTTGGC		326343	NR_003658	metallothionein 1D, pseudogene (functional)
A_23_P420942	0.00329869	0.0391899	1212.8	10.2441	1212.8	up	11993	12.7693	12513.3	21.7575	15511	5.47011	4.9697	-5.21746	4.6261	-4.6261	4.82277	-6.47026	Detected	MT1E	PREDICTED: Homo sapiens metallothionein 1E (MT1E), transcript variant X1, mRNA [XM_005255956]	TTTTTCTCGTGGGACACAAACCCCAACTGTACCCCCTATGGTTTCAGAACAGAGCTGTGC		4493	XM_005255956	metallothionein 1E
A_23_P206724	0.000223514	0.0298991	40.9878	5.35712	40.9878	up	163250	4488.67	169887	4836.18	186963	4040.04	2.92194	-2.57457	2.57457	-2.64446	2.59958	-2.75625	Detected	MT1E	Homo sapiens metallothionein 1E (MT1E), mRNA [NM_175617]	GGCATCGGAGAAGTGCAGCTGCTGTGCCTGATGTGGGAACAGCTCTTCTCCCAGATGTAA	ENST00000306061	4493	NM_175617	metallothionein 1E
A_21_P0000671	0.000130721	0.0298991	749.693	9.55016	749.693	up	149834	215.084	149567	217.488	162084	214.632	5.08178	-4.67433	4.67433	-4.83577	4.67712	-4.70713	Detected	MT1E	Homo sapiens metallothionein 1E (MT1E), mRNA [NM_175617]	ATGTGGGAACAGCTCTTCTCCCAGATGTTAATAGAACAACCTGCACAACCTGGATTTTTT	ENST00000563395	4493	NM_175617	metallothionein 1E
A_23_P15174	6.93023e-06	0.0183978	2520.16	11.2993	2520.16	up	92705.4	45.4484	98310.1	40.0137	108730	39.6501	5.81313	-5.49295	5.49295	-5.85415	5.52512	-5.71961	Detected	MT1F	Homo sapiens metallothionein 1F (MT1F), transcript variant 1, mRNA [NM_005949]	TGCCAGGACAACCTTTCTCCCAGATGTAAACAGAGAGACATGTACAAACCTGGATTTTTT	ENST00000564295	4494	NM_005949	metallothionein 1F
A_33_P3233645	0.000259885	0.0298991	410.306	8.68056	410.306	up	173169	473.67	163074	511.625	202282	397.434	4.65873	-4.16721	4.16721	-4.23348	4.36489	-4.45014	Detected	MT1G	Homo sapiens metallothionein 1G (MT1G), transcript variant 2, mRNA [NM_001301267]	CCCGTAAAATCTAGGATTTTTTGTTTTTTGCTACAATCTTGACCCCTTTGCTACATTCCC	ENST00000379811	4495	NM_001301267	metallothionein 1G
A_33_P3368313	0.000367402	0.030042	3247.24	11.665	3247.24	up	99724.7	29.5341	109043	47.1134	125678	33.4082	5.90646	-6.12676	5.63047	-5.63047	5.72213	-5.9787	Detected	MT1H	Homo sapiens metallothionein 1H (MT1H), mRNA [NM_005951]	TGTCGGGACAGCCCTGCTGTCAGATGAAAACAGAATGACACGTAAAATCCAGGATTTTTT	ENST00000332374	4496	NM_005951	metallothionein 1H
A_33_P3315314	0.000558255	0.0319891	20.8068	4.37899	20.8068	up	261624	13587.6	282887	15953.6	290607	12828.6	2.44566	-2.13333	2.15353	-2.07921	2.07921	-2.24601	Detected	MT1HL1	Homo sapiens metallothionein 1H-like 1 (MT1HL1), mRNA [NM_001276687]	AGTGCAAAAAGTGCAAATGCACCTCCTGCAAGAAGAGCTGCTGCTCCTGTTGCCCCCTGG	ENST00000464121	645745	NM_001276687	metallothionein 1H-like 1
A_23_P427703	0.00172586	0.0342802	12.7592	3.67347	12.7592	up	84458.1	7188.67	83894.3	8593.53	105345	6774.8	2.10039	-1.76591	1.68586	-1.68586	1.90116	-1.88122	Detected	MT1L	Homo sapiens metallothionein 1L (gene/pseudogene) (MT1L), non-coding RNA [NR_001447]	CTGCTGTGCCTGATGTGGGGACAGACCTGCTCCCAGATGTAAACAGAGCAACCTGCACAA	ENST00000565768	4500	NR_001447	metallothionein 1L (gene/pseudogene)
A_23_P66241	0.0007821	0.0322856	1603.15	10.6467	1603.15	up	78738.4	43.2386	77907.6	50.1713	101216	80.9044	5.34421	-5.79818	4.92404	-5.76111	5.18848	-4.92404	Detected	MT1M	Homo sapiens metallothionein 1M (MT1M), mRNA [NM_176870]	TTTTTTCAATACGATACTGAGCCATTTGCTGCATTTCTTTTTATGTTAAATATGTGAGTG	ENST00000379818	4499	NM_176870	metallothionein 1M
A_33_P3350056	0.0041719	0.0413339	15.3288	3.93817	15.3288	up	83230.3	6499.67	96555.6	9224.04	161917	7018.13	1.92679	-2.06374	1.73618	-1.73618	2.36884	-1.98278	Detected	MT1X	Homo sapiens metallothionein 1X (MT1X), mRNA [NM_005952]	TCCTGTGCCTGTGCCGGCTCCTGCAAATGCAAAGAGTGCAAATGCACCTCCTGCAAGAAG	ENST00000394485	4501	NM_005952	metallothionein 1X
A_33_P3236868	0.000440698	0.0308056	52.9348	5.72615	52.9348	up	83730.9	1689.48	96838.5	2225.83	113332	1918.76	2.95886	-2.98411	2.76382	-2.76382	2.87755	-2.83028	Detected	MT1X	Homo sapiens metallothionein 1X (MT1X), mRNA [NM_005952]	TGCCAGGACAGCTGTGCTCTCAGATGTAAATAGAGCAACCTATATAAACCTGGATTTTTT	ENST00000568370	4501	NM_005952	metallothionein 1X
A_24_P383609	0.0022724	0.036233	5.01989	2.32766	5.01989	up	334.912	86.5873	372.49	67.7172	386.334	75.6789	1.28769	-0.975725	1.03625	-1.50783	0.975725	-1.19975	Detected	NANOS1	Homo sapiens nanos homolog 1 (Drosophila) (NANOS1), mRNA [NM_199461]	TACAGCTCCTTATCGTTCTATGTACCAGGTATTTTATTACTGAACTAGCAACTAGCCTTT	ENST00000340087	340719	NM_199461	nanos homolog 1 (Drosophila)
A_23_P300600	0.0040606	0.0410826	6.55428	2.71244	6.55428	up	7083.22	1243.44	9252.54	1276.07	7053.07	1205.04	1.67306	-1.14887	1.65364	-1.28897	1.14887	-1.22389	Detected	NEFH	Homo sapiens neurofilament, heavy polypeptide (NEFH), mRNA [NM_021076]	ACTGAATTATGCCAGGGCGCACTTTCCACTGGAGTTCACTTTCAATTGCTTCTGTGCAAT	ENST00000310624	4744	NM_021076	neurofilament, heavy polypeptide
A_33_P3408152	0.000740167	0.0322202	6.19333	2.63071	6.19333	up	440.428	88.7437	509.656	94.8226	531.706	69.5352	1.43468	-1.18837	1.24043	-1.27026	1.18837	-1.57003	Detected	NEFH	Homo sapiens neurofilament, heavy polypeptide (NEFH), mRNA [NM_021076]	TAGCAAGCCTAAGGCAGAAAAGGCTGAAAAATCCTCCAGCACAGACCAAAAAGACAGCAA	ENST00000310624	4744	NM_021076	neurofilament, heavy polypeptide
A_33_P3403117	0.00341374	0.039672	12.4698	3.64037	12.4698	up	32.9965	2.44489	32.3095	3.14436	38.3814	3.19707	2.07217	-1.99417	1.63695	-1.80864	1.77223	-1.63695	Detected	NR2F1	Homo sapiens nuclear receptor subfamily 2, group F, member 1 (NR2F1), mRNA [NM_005654]	AGCTACAAAGCATGGGAAAAAGAGACTCTTTTAGGATCAGATCTGTGAGCACGTTGGCGA	ENST00000615873	7025	NM_005654	nuclear receptor subfamily 2, group F, member 1
A_33_P3327504	0.00417584	0.0413339	10.7808	3.43039	10.7808	up	27.2096	2.72253	40.3728	3.35842	32.8814	3.67201	1.73799	-1.89497	1.90239	-1.76961	1.49311	-1.49311	Detected	OR51V1	Homo sapiens olfactory receptor, family 51, subfamily V, member 1 (OR51V1), mRNA [NM_001004760]	GTCAAGACCCAACAGATTCATACCAGAATGCTTAGACTCTTTTCTCTGAAAAGATATTGA	ENST00000321255	283111	NM_001004760	olfactory receptor, family 51, subfamily V, member 1
A_24_P74070	0.00164952	0.0340346	4.21925	2.07699	4.21925	up	74.585	21.2184	111.581	31.424	113.053	21.8799	0.868176	-1.25726	1.04445	-0.868176	0.950184	-1.24273	Detected	PARD6G	Homo sapiens par-6 family cell polarity regulator gamma (PARD6G), mRNA [NM_032510]	AACTGGGTCGGCTATCAAGAAGGAAGGTTATATTTCTTATCACATTTTAAGTTGTTAAGC	ENST00000353265	84552	NM_032510	par-6 family cell polarity regulator gamma
A_24_P173823	0.000340126	0.0298991	4.81635	2.26794	4.81635	up	24.5673	6.26497	52.3844	12.1804	39.5218	6.94812	0.75076	-1.53246	1.43829	-0.750759	0.918634	-1.41291	Detected	PBX1	Homo sapiens pre-B-cell leukemia homeobox 1 (PBX1), transcript variant 1, mRNA [NM_002585]	ATGATACTAACACGGTGTAGGTTTTACAGTCTCCTAATTTGTACTGGTAATGCATATTCC	ENST00000540236	5087	NM_002585	pre-B-cell leukemia homeobox 1
A_33_P3349637	0.00113436	0.0325974	4.82199	2.26963	4.82199	up	2345.19	543.015	2986.28	689.713	3060.59	594.511	1.19445	-1.22806	1.13823	-1.06052	1.06052	-1.1271	Detected	PCDH1	Homo sapiens protocadherin 1 (PCDH1), transcript variant 1, mRNA [NM_002587]	GGCTTCTGGGGCTGGGTCCCACATGCCCTTGACCCTGACAATAAAGTTCTCTATTTTTGG	ENST00000394536	5097	NM_002587	protocadherin 1
A_33_P3290729	0.00095306	0.0322856	5.1473	2.36382	5.1473	up	223.747	55.9728	272.885	50.86	279.467	51.1893	1.25408	-1.05685	1.13564	-1.37252	1.05685	-1.2155	Detected	POU3F2	Homo sapiens POU class 3 homeobox 2 (POU3F2), mRNA [NM_005604]	AATACTTTGTTTTGGTACATTTGGTTGTGCTTGTGGGGAAAATAAAAACGCAGAGATCCT	ENST00000328345	5454	NM_005604	POU class 3 homeobox 2
A_33_P3312642	0.0044589	0.0421096	11.9722	3.58162	11.9722	up	196.549	16.9825	456.968	56.4136	373.298	23.7524	1.14505	-2.69958	1.9574	-1.14505	1.55246	-2.24531	Detected	PRR32	Homo sapiens proline rich 32 (PRR32), mRNA [NM_001122716]	TTGCCCATTTCCATTCTGGGGGAATGCCAGCTCCTGCATCACCCAACAGAGAGCACAGCT	ENST00000371125	100130613	NM_001122716	proline rich 32
A_23_P83298	0.00261233	0.0373969	13.7931	3.78588	13.7931	up	50.1008	5.63006	61.3774	3.70349	88.9521	5.82239	1.77938	-1.68609	1.66739	-2.46783	2.08954	-1.66739	Detected	PRRX2	Homo sapiens paired related homeobox 2 (PRRX2), mRNA [NM_016307]	CAAGGACCTCATTTAGTTTGTGTATTAAAACCAAAAAGCTTTTGTCTTTAAGAAATAAAA	ENST00000372469	51450	NM_016307	paired related homeobox 2
A_24_P193295	0.00194909	0.0353715	5.35741	2.42153	5.35741	up	67.2806	13.6448	80.9872	16.1877	60.9923	11.3964	1.60211	-1.01159	1.46475	-0.942515	0.942514	-1.30113	Detected	RAB15	Homo sapiens RAB15, member RAS oncogene family (RAB15), mRNA [NM_198686]	TCTCGGGTCCATATATGAATTGTGAGCAGGGTTCATCTATTTTAAACACAGATGTTTACA	ENST00000533601	376267	NM_198686	RAB15, member RAS oncogene family
A_24_P408603	0.00377018	0.0404818	17.5818	4.13602	17.5818	up	53.1229	2.79429	59.3494	3.50229	50.3076	3.47309	2.43663	-2.12401	2.19166	-1.97567	1.84004	-1.84004	Detected	RAB39B	Homo sapiens RAB39B, member RAS oncogene family (RAB39B), mRNA [NM_171998]	AAGCAAGATTATCCAGTGGGTAAATGAGAGTCGACTGGATTCTGTCAGTTCAAAAAAGGA	ENST00000369454	116442	NM_171998	RAB39B, member RAS oncogene family
A_24_P857527	0.00448708	0.0422601	5.47564	2.45303	5.47564	up	21.6491	4.8945	24.9805	3.97397	20.5978	4.06283	1.5234	-0.933543	1.32502	-1.4116	0.933543	-1.23198	Detected	RAET1K	Homo sapiens retinoic acid early transcript 1K pseudogene (RAET1K), non-coding RNA [NR_024045]	TTCCATAACATTTCAATGGGGGATTGTAAGACATGGCTTGAAGACTTTTTGATATACTGG	ENST00000403651	646024	NR_024045	retinoic acid early transcript 1K pseudogene
A_24_P165423	0.00160332	0.0339761	9.735	3.28318	9.735	up	32.6934	4.99993	39.9102	4.02267	49.3597	4.04235	1.569	-1.45189	1.45189	-1.94311	1.6453	-1.78836	Detected	RBP7	Homo sapiens retinol binding protein 7, cellular (RBP7), mRNA [NM_052960]	AAGGAGACAAACTCCACCTGGAAATGTTCTGTGAAGGTCAAGTGTGCAAACAGACATTCC	ENST00000315901	116362	NM_052960	retinol binding protein 7, cellular
A_33_P3247624	0.00031044	0.0298991	41.3613	5.37021	41.3613	up	411.796	11.7162	117.972	3.44572	208.142	4.12261	3.82778	-1.61943	1.61943	-3.56253	2.32539	-3.15607	Detected	REP15	Homo sapiens RAB15 effector protein (REP15), mRNA [NM_001029874]	TTGAAAATGATTACTGGGATCAAAGTACATTCATGTCGCAATTACAGAGAGAGAGAGAAA	ENST00000310791	387849	NM_001029874	RAB15 effector protein
A_23_P320578	0.00313942	0.038498	9.50371	3.24849	9.50371	up	1247.21	135.297	1435.45	203.908	1371.29	120.743	1.74162	-1.77475	1.53956	-1.36042	1.36042	-1.96869	Detected	RGS16	Homo sapiens regulator of G-protein signaling 16 (RGS16), mRNA [NM_002928]	CTCTGAATGTGCTGGGAACCTCTTGGAGCCTGTCAGGAACTCCTCACTGTTTAAATATTT	ENST00000367558	6004	NM_002928	regulator of G-protein signaling 16
A_23_P217845	0.00748366	0.0495718	7.74084	2.95249	7.74084	up	205.339	25.9085	265.023	51.405	279.877	28.7154	1.27931	-2.01907	1.24255	-1.20806	1.20806	-1.90043	Detected	RGS16	Homo sapiens regulator of G-protein signaling 16 (RGS16), mRNA [NM_002928]	TCCGATCAGCTACCAAGCTGGCCTCCAGGGCACACCAGATCTTTGAGGAGTTCATTTGCA	ENST00000367558	6004	NM_002928	regulator of G-protein signaling 16
A_23_P114947	2.96219e-05	0.0285211	4.66206	2.22097	4.66206	up	1210.12	324.033	1834.47	410.392	1632.53	313.243	1.06775	-1.14506	1.26309	-0.981667	0.981667	-1.22368	Detected	RGS2	Homo sapiens regulator of G-protein signaling 2 (RGS2), mRNA [NM_002923]	TAGATCTGGGATTATGTGGCCTTAGGTAGCTGGTTGTACATCTTTCCCTAAATCGATCCA	ENST00000235382	5997	NM_002923	regulator of G-protein signaling 2
A_33_P3401284	0.000474828	0.0312935	4.17848	2.06298	4.17848	up	8919.17	2817.11	8197.66	1997.58	10225.7	2121.02	1.25056	-0.723996	0.723996	-1.39743	0.929738	-1.16321	Detected	RMRP	Homo sapiens RNA component of mitochondrial RNA processing endoribonuclease (RMRP), RNase MRP RNA [NR_003051]	TGTATCCTAGGCTACACACTGAGGACTCTGTTCCTCCCCTTTCCGCCTAGGGGAAAGTCC	ENST00000602361	6023	NR_003051	RNA component of mitochondrial RNA processing endoribonuclease
A_21_P0000504	0.000458133	0.0312512	11.7772	3.55793	11.7772	up	3620.21	385.809	4372.06	357.412	4989.93	408.365	1.81119	-1.73078	1.67857	-2.01855	1.75611	-1.67857	Detected	RNU6ATAC	Homo sapiens RNA, U6atac small nuclear (U12-dependent splicing) (RNU6ATAC), small nuclear RNA [NR_023344]	GACAACACGCATACGGTTAAGGCATTGCCACCTACTTCGTGGCATCTAACCATCGTTTTT		100151684	NR_023344	RNA, U6atac small nuclear (U12-dependent splicing)
A_33_P3389394	0.000447961	0.0309674	14.4664	3.85463	14.4664	up	5417.44	479.994	6041.54	396.686	6265.87	414.347	2.05826	-1.75013	1.8107	-2.20262	1.75013	-1.99206	Detected	RPPH1	Homo sapiens ribonuclease P RNA component H1 (RPPH1), RNase P RNA [NR_002312]	AATGGCTGAGGTGAGGTACCCCGCAGGGGACCTCATAACCCAATTCAGACTACTCTCCTC		85495	NR_002312	ribonuclease P RNA component H1
A_21_P0000350	0.00492444	0.0433265	6.46706	2.69311	6.46706	up	1276.6	316.355	1696.96	231.991	1519.52	193.138	1.29564	-1.02891	1.30142	-1.65386	1.02891	-1.77059	Detected	SCARNA20	Homo sapiens small Cajal body-specific RNA 20 (SCARNA20), guide RNA [NR_002999]	GAGGATCGTCGTCAGGACTGCCACGAGTGGGGCAGCCTTGTTTTCCTGCCTCAGACATGT		677681	NR_002999	small Cajal body-specific RNA 20
A_33_P3318606	0.00724005	0.0488186	7.14188	2.8363	7.14188	up	149.757	18.6019	116.405	20.7547	132.899	19.1855	2.03724	-1.28372	1.26891	-1.3032	1.34692	-1.26891	Detected	SHC2	SHC (Src homology 2 domain containing) transforming protein 2 [Source:HGNC Symbol;Acc:HGNC:29869] [ENST00000588376]	CAGTAAGACCAGACAAGGAAACGAGAGGCGTACGCTTTGGGAAGGAAGCCCACCTGACAA	ENST00000588376	25759	BC034544	SHC (Src homology 2 domain containing) transforming protein 2
A_33_P3379926	0.00263702	0.0375469	7.75089	2.95436	7.75089	up	20.9407	2.88334	29.5523	3.83914	25.4828	3.56327	1.56574	-1.60662	1.65784	-1.37105	1.33092	-1.33092	Detected	SLC17A4	Homo sapiens solute carrier family 17, member 4 (SLC17A4), transcript variant 1, mRNA [NM_005495]	AGCTTGGGAATAAGCCTTAAAGAATTCCAGTATTTAATGGTCAGCTGGAGGATGATTAGC	ENST00000439485	10050	NM_005495	solute carrier family 17, member 4
A_23_P156180	0.00232366	0.0365542	5.34651	2.4186	5.34651	up	1457.51	341.287	1463.72	332.489	2215.3	317.393	1.40252	-1.00379	1.00379	-1.21894	1.48848	-1.13826	Detected	SLC22A4	Homo sapiens solute carrier family 22 (organic cation/zwitterion transporter), member 4 (SLC22A4), mRNA [NM_003059]	AAACAAGAGACTCAATGGAGACAGAAGAAAATCCCAAGGTTCTAATAACTGCATTCTGAA	ENST00000200652	6583	NM_003059	solute carrier family 22 (organic cation/zwitterion transporter), member 4
A_23_P23815	2.10288e-05	0.0285211	16.7714	4.06793	16.7714	up	23917.5	1745.5	28460.1	1778.23	28267.4	1530.48	2.18259	-1.90563	2.0286	-2.0563	1.90563	-2.12504	Detected	SLC30A1	Homo sapiens solute carrier family 30 (zinc transporter), member 1 (SLC30A1), mRNA [NM_021194]	ACAAGCCCCTTCTGGAAAGGATGCAGAAAAGACCCCAGCAGTTAGCATTTCTTGTTTAGA	ENST00000367001	7779	NM_021194	solute carrier family 30 (zinc transporter), member 1
A_33_P3283824	0.000927062	0.0322856	9.23205	3.20665	9.23205	up	23.4011	3.04524	34.8047	3.62602	38.3109	4.18267	1.41285	-1.84096	1.58069	-1.7666	1.60599	-1.41285	Detected	SLC39A8	Homo sapiens solute carrier family 39 (zinc transporter), member 8 (SLC39A8), transcript variant 3, mRNA [NM_001135147]	GGACATTAAAGGAATTTCCCTTTTGTTGACATAACAGTAGGATGGCTATAGCTAACAATA	ENST00000424970	64116	NM_001135147	solute carrier family 39 (zinc transporter), member 8
A_23_P205489	0.00167867	0.0341123	4.06822	2.0244	4.06822	up	1716	561.676	2244.02	611.112	3297.26	639.855	0.891338	-1.03176	0.873514	-1.08753	1.31553	-0.873514	Detected	SLC7A8	Homo sapiens solute carrier family 7 (amino acid transporter light chain, L system), member 8 (SLC7A8), transcript variant 2, mRNA [NM_182728]	TTTTTTGTAAAGTTGATGCCTTACTTTTTGGATAAATATTTTTGAAGCTGGTATTTCTAT	ENST00000617478	23428	NM_182728	solute carrier family 7 (amino acid transporter light chain, L system), member 8
A_23_P5903	0.000716366	0.0319891	9.62503	3.26679	9.62503	up	2937.6	399.555	3423.51	403.586	4899.67	399.133	1.68703	-1.503	1.503	-1.666	1.90704	-1.53429	Detected	SLCO4A1	Homo sapiens solute carrier organic anion transporter family, member 4A1 (SLCO4A1), mRNA [NM_016354]	TATTTATGGACACACAGTTTGCATCAGAACGTGTTTATAGAATGTGTTTTATACCCGATC	ENST00000466961	28231	NM_016354	solute carrier organic anion transporter family, member 4A1
A_33_P3294679	0.00757422	0.049724	8.23113	3.04109	8.23113	up	28.192	2.94206	22.3767	3.39144	30.4295	4.01795	1.94527	-1.62698	1.20711	-1.59938	1.53742	-1.20711	Detected	SMCR5	Homo sapiens Smith-Magenis syndrome chromosome region, candidate 5 (non-protein coding) (SMCR5), long non-coding RNA [NR_024007]	ACTCAGAGAATGGAAGCACCACATGGATTAATTGGAGCAGTCTTCAAGTTGGTGAAAAAA		140771	NR_024007	Smith-Magenis syndrome chromosome region, candidate 5 (non-protein coding)
A_21_P0000320	0.00631941	0.0469527	5.82163	2.54142	5.82163	up	32.4803	8.09046	45.4865	9.39138	40.8232	4.68571	1.23385	-1.08328	1.31486	-1.04564	1.04564	-1.901	Detected	SNORA30	Homo sapiens small nucleolar RNA, H/ACA box 30 (SNORA30), small nucleolar RNA [NR_002966]	AAACCCTTGATTGTATTCTTGCCCTGGGATTATACCAGTGGCAACTGTCACTCAATGGGA		677813	NR_002966	small nucleolar RNA, H/ACA box 30
A_21_P0000219	0.00128672	0.0332716	6.82515	2.77086	6.82515	up	1008.53	210.512	1427.64	208.281	1680.98	202.213	1.28607	-1.28607	1.38259	-1.47891	1.50509	-1.37386	Detected	SNORD34	Homo sapiens small nucleolar RNA, C/D box 34 (SNORD34), small nucleolar RNA [NR_000019]	TGATGTTCCGCAACTACCTACATTGTTTGATCCTCATGAAAGCAGCACTGGCTGAGACGC	ENST00000472481	26817	NR_000019	small nucleolar RNA, C/D box 34
A_21_P0000218	0.00294624	0.0381087	4.00576	2.00208	4.00576	up	620.564	175.113	670.08	205.945	715.707	149.53	1.19645	-0.940704	0.902341	-0.884207	0.884207	-1.19832	Detected	SNORD35A	Homo sapiens small nucleolar RNA, C/D box 35A (SNORD35A), small nucleolar RNA [NR_000018]	TCACGATGGTCTGCGGATGTCCCTGTGGGAATGGCGACAATGCCAATGGCTTAGCTGATG	ENST00000476268	26816	NR_000018	small nucleolar RNA, C/D box 35A
A_33_P3226542	0.00183957	0.0347379	4.32237	2.11182	4.32237	up	23665.3	6691.52	23638.6	5245.29	27135.8	6237.59	1.27036	-0.863868	0.863868	-1.39265	0.94975	-0.994974	Detected	SNORD3B-1	Homo sapiens small nucleolar RNA, C/D box 3B-1 (SNORD3B-1), small nucleolar RNA [NR_003271]	TGATGATCGTTCTTCTCTCCGTATTGGGGAGTGAGAGGGAGAGAACGCGGTCTGAGTGGT	ENST00000580533	26851	NR_003271	small nucleolar RNA, C/D box 3B-1
A_21_P0000378	0.00521393	0.0443112	9.09531	3.18512	9.09531	up	227.574	31.3792	225.327	34.4764	339.47	24.9072	1.79475	-1.37557	1.37557	-1.41724	1.85366	-1.73857	Detected	SNORD66	Homo sapiens small nucleolar RNA, C/D box 66 (SNORD66), small nucleolar RNA [NR_003055]	CTGTTAGTGCCACGTGTCTGGGCCACTGAGACACCATGATGGAACTGAGGATCTGAGGAA		692107	NR_003055	small nucleolar RNA, C/D box 66
A_21_P0000382	0.00135362	0.0332716	4.34408	2.11905	4.34408	up	176.995	46.3768	206.348	49.728	227.195	51.1175	1.15847	-1.08563	0.974976	-1.16245	1.00065	-0.974976	Detected	SNORD71	Homo sapiens small nucleolar RNA, C/D box 71 (SNORD71), small nucleolar RNA [NR_003059]	ATGAAAGTACGGAGTGATCCATCGGCTAAGTGTCTTGTCACAATGCTGACACTCAAACTG		692111	NR_003059	small nucleolar RNA, C/D box 71
A_23_P254741	0.000459455	0.0312723	4.00177	2.00064	4.00177	up	2930.52	915.241	3565.77	990.985	4575.27	957.985	1.03826	-0.952539	0.916449	-1.0153	1.16292	-0.916449	Detected	SOD3	Homo sapiens superoxide dismutase 3, extracellular (SOD3), mRNA [NM_003102]	AGAGCTGCTCCTTTGGGGGAATGTTTGGCAACCTTTGTGTTACAGATTAAAAATTCAGCA	ENST00000382120	6649	NM_003102	superoxide dismutase 3, extracellular
A_32_P134968	0.00130106	0.0332716	5.64552	2.49711	5.64552	up	320.276	69.4155	429.315	90.4312	411.021	58.2747	1.23595	-1.2819	1.2538	-1.07781	1.07781	-1.56405	Detected	SPTB	Homo sapiens spectrin, beta, erythrocytic (SPTB), transcript variant 1, mRNA [NM_001024858]	ACCTGCTCAACCGTGCTTCCACCAACCAGAGGAAACCCATTTACTAGTTTTTCTAATAAA	ENST00000389722	6710	NM_001024858	spectrin, beta, erythrocytic
A_33_P3216928	0.00222686	0.0361219	9.6368	3.26855	9.6368	up	20.7145	3.01062	28.8664	3.48505	50.1139	3.71677	1.41007	-1.6843	1.48396	-1.65065	2.16661	-1.41007	Detected	SSBP3-AS1	Homo sapiens SSBP3 antisense RNA 1 (SSBP3-AS1), long non-coding RNA [NR_103541]	CCCAAGAGTTAATCACTTTTCTGACGGTTTATTTTATTCATCTTTGGTAACAAATGGCTG		619518	NR_103541	SSBP3 antisense RNA 1
A_24_P68311	0.00374411	0.0404818	6.9859	2.80445	6.9859	up	19.339	3.11426	30.6047	4.04229	23.5669	3.78512	1.46376	-1.48266	1.72113	-1.28385	1.23097	-1.23097	Detected	SYNE2	Homo sapiens spectrin repeat containing, nuclear envelope 2 (SYNE2), transcript variant 1, mRNA [NM_015180]	CAATGCGCCACCTATGAGTCTGTCAATGTGACCGATTTTAAGTCAAGTTGGAGAAATGGG	ENST00000357395	23224	NM_015180	spectrin repeat containing, nuclear envelope 2
A_23_P355517	0.00540608	0.0447722	5.35459	2.42078	5.35459	up	29.3423	8.37872	29.0778	5.82586	27.1212	3.59627	1.37582	-0.744225	0.957888	-1.44596	0.744225	-1.99421	Detected	SYNPO2L	Homo sapiens synaptopodin 2-like (SYNPO2L), transcript variant 2, mRNA [NM_024875]	ACAGCATCTTGTGAAAGTTATGGAGCATGAAAAGACTGAAGGGCCAGGACAGTTTGCATG	ENST00000394810	79933	NM_024875	synaptopodin 2-like
A_23_P136936	0.00391984	0.0407972	4.36668	2.12654	4.36668	up	31.9907	10.833	55.5858	13.0302	58.2654	10.267	0.892561	-0.981517	1.28476	-0.892561	1.23952	-1.08869	Detected	SYP	Homo sapiens synaptophysin (SYP), mRNA [NM_003179]	CACTCCCGTGATGAAACAGCTAGGTTAATAGGAGGACAGAACCAACGGGTCTGTGGGACT	ENST00000263233	6855	NM_003179	synaptophysin
A_19_P00318418	4.89846e-05	0.0285211	9.24096	3.20804	9.24096	up	386.61	51.9898	513.674	60.5142	591.331	55.0894	1.57633	-1.63011	1.58144	-1.58854	1.67138	-1.57633	Detected	TBXAS1	Homo sapiens thromboxane A synthase 1 (platelet) (TBXAS1), transcript variant 5, mRNA [NM_001166254]	GATGTGAGCTAGTTTGTCTGGTTGAGTTGGATGTTTAAATAGAAGGCAGAACAACAACAG	ENST00000481440	6916	NM_001166254	thromboxane A synthase 1 (platelet)
A_33_P3220565	0.0021096	0.0360235	4.16919	2.05977	4.16919	up	13.9606	4.7319	18.1689	4.2519	18.548	3.75806	0.990437	-0.882301	0.965681	-1.21409	0.882301	-1.24449	Detected	UBTD2	Homo sapiens ubiquitin domain containing 2 (UBTD2), mRNA [NM_152277]	GGGAAAACCATGGTGCTGTTTAATTGTAAATAGATTGATATAAGATTGGACCAGTACTTG	ENST00000393792	92181	NM_152277	ubiquitin domain containing 2
A_24_P279489	0.00691845	0.0482045	5.0142	2.32602	5.0142	up	16.1147	3.07457	22.4676	5.09504	20.4056	4.35706	1.164	-1.53778	1.2386	-0.986549	0.986549	-1.06458	Detected	VPS53	Homo sapiens vacuolar protein sorting 53 homolog (S. cerevisiae) (VPS53), transcript variant 1, mRNA [NM_001128159]	TTAGGTCATGACTGTAATATCAAGCTTACACGAGAGTTTTAAAAGACTGAGCAGTATCCC	ENST00000437048	55275	NM_001128159	vacuolar protein sorting 53 homolog (S. cerevisiae)
A_33_P3294372	0.00445628	0.0421096	5.63868	2.49536	5.63868	up	3523.96	751.317	3876.26	903.499	6070.71	793.604	1.36017	-1.1814	1.09277	-1.09277	1.6268	-1.13216	Detected	VPS9D1-AS1	Homo sapiens VPS9D1 antisense RNA 1 (VPS9D1-AS1), long non-coding RNA [NR_036480]	TGATCCTTTGTGCAGCGGCTGCTGGCCTCTCAAACTTAATGTGTTCATTGCGGAACTTGC		100128881	NR_036480	VPS9D1 antisense RNA 1
A_21_P0000513	0.00250333	0.036858	5.43354	2.44189	5.43354	up	170.272	33.4873	165.675	32.5201	187.52	35.2671	1.52871	-1.12931	1.08436	-1.34906	1.14988	-1.08436	Detected	VTRNA1-1	Homo sapiens vault RNA 1-1 (VTRNA1-1), vault RNA [NR_026703]	AGCGGTTACTTCGACAGTTCTTTAATTGAAACAAGCAACCTGTCTGGGTTGTTCGAGACC		56664	NR_026703	vault RNA 1-1
A_21_P0000584	0.00101188	0.0322856	6.33512	2.66337	6.33512	up	1157.24	208.747	1267.83	205.727	1361.43	213.061	1.53316	-1.24956	1.25997	-1.44806	1.24956	-1.24981	Detected	VTRNA2-1	Homo sapiens vault RNA 2-1 (VTRNA2-1), vault RNA [NR_030583]	CTTTCTATCTGTCCATCTCTGTGCTGGGGTTCGAGACCCGCGGGTGCTTACTGACCCTTT	ENST00000602301	100126299	NR_030583	vault RNA 2-1
A_21_P0010828	0.00288928	0.0380046	4.35967	2.12422	4.35967	up	12.6448	3.81452	63.1483	16.9569	21.0276	3.64853	0.0330014	-2.00783	1.94834	-0.0330014	0.248708	-2.10178	Detected	XLOC_l2_001592	BROAD Institute lincRNA (XLOC_l2_001592), lincRNA [TCONS_l2_00003049]	ATTCTCATAGGAAAAAGAGAAAACGCGCACTTCCACCAGCATGTGGCTTCATAAGGGCAA
A_21_P0011020	0.00508276	0.0438512	4.01483	2.00534	4.01483	up	21.1323	7.93226	19.0571	4.7463	20.0834	3.86624	1.1585	-0.567015	0.604506	-1.48541	0.567014	-1.63357	Detected	XLOC_l2_002790	BROAD Institute lincRNA (XLOC_l2_002790), lincRNA [TCONS_l2_00005211]	AAGAGAAATAAGTCAGATGGGTTTAGGCACACAGCAGTGAGACACACTGAAGGAAATGAA
A_21_P0011850	0.00378471	0.0404818	5.78882	2.53327	5.78882	up	18.0072	4.45143	16.5422	3.25109	27.0673	3.34495	1.42769	-0.900405	0.900404	-1.53122	1.49763	-1.34245	Detected	XLOC_l2_007543	BROAD Institute lincRNA (XLOC_l2_007543), lincRNA [TCONS_l2_00013972]	AAATTCTGATATGATCAACTGGTGACACTACTCAGAAGACTGTGTTAAGAATTCCGAATT
A_21_P0013305	0.00164495	0.0340346	5.07577	2.34363	5.07577	up	263.371	59.4364	265.368	52.7062	236.608	47.0141	1.56609	-0.893453	1.17212	-1.2443	0.893453	-1.26147	Detected	XLOC_l2_013835	BROAD Institute lincRNA (XLOC_l2_013835), lincRNA [TCONS_l2_00026573]	AGTAGAATCAGAAGACCTGGGGAAAATCCTGCATCTTGCATATATTTCAATCTCTCCTCT
A_21_P0013602	0.00331202	0.0392815	19.3807	4.27655	19.3807	up	336.666	20.0409	417.048	31.6085	337.336	11.9624	2.20872	-2.17345	2.11275	-1.69355	1.69355	-2.94764	Detected	XLOC_l2_015038	BROAD Institute lincRNA (XLOC_l2_015038), lincRNA [TCONS_l2_00029082]	CAGGTTTGTGCTCAGAAGCCCCTACACCAGCTGCTGCGTGATGGAGAACAGGAGTCAAAG
A_21_P0013894	0.00141693	0.0334244	5.43971	2.44353	5.43971	up	16495.7	4075.61	57500.9	9878.73	45781.1	7803.97	0.614515	-1.71435	2.01114	-0.614515	1.56914	-0.806921	Detected	XLOC_l2_015938	BROAD Institute lincRNA (XLOC_l2_015938), lincRNA [TCONS_l2_00030929]	AATCAAGAAAGACCTATCAATCTGTCAATCCTGTCCATGTCCGGGCCGGTCCAAGAATTT
A_21_P0000040	0.000480681	0.0312935	6.42912	2.68462	6.42912	up	1689.9	306.275	2033.87	362.021	2590.77	351.978	1.37129	-1.40461	1.23371	-1.34084	1.4697	-1.23371	Detected	ZBTB24	Homo sapiens zinc finger and BTB domain containing 24 (ZBTB24), transcript variant 2, mRNA [NM_001164313]	CAGGTAATGATGTTTTCAAAGCTGATTGCAGTGTGTTGCAGAATTGGGAGTAGTGATGAT		9841	NM_001164313	zinc finger and BTB domain containing 24
A_32_P226205	0.0017763	0.034587	4.00366	2.00132	4.00366	up	42.1161	13.8047	39.1067	11.0127	58.7276	11.5465	1.21645	-0.704627	0.704627	-1.20808	1.17808	-0.992087	Detected	ZFHX2	Homo sapiens zinc finger homeobox 2 (ZFHX2), mRNA [NM_033400]	CACGCGCACAAAAGAGAGAAACGGACACCAGAGGAATGAACTAAAGAAAAACGTAAACTT	ENST00000419474	85446	NM_033400	zinc finger homeobox 2
A_19_P00320619	0.00216122	0.0360957	5.94936	2.57273	5.94936	up	128.011	22.8921	148.585	27.116	150.235	25.4607	1.47931	-1.31589	1.28947	-1.24907	1.19223	-1.19223	Detected	ZNF876P	Homo sapiens zinc finger protein 876, pseudogene (ZNF876P), non-coding RNA [NR_027481]	GAACATGTAGTGTCTTGTCCTGCAAACACATACGGACTTTTCATTTTTATTTACATGAAG	ENST00000356347	642280		zinc finger protein 876, pseudogene
A_21_P0005592	0.00204562	0.035733	5.04065	2.33361	5.04065	up	20.3992	5.11156	25.4279	6.0146	28.2538	4.33496	1.16914	-1.1394	1.08217	-1.08217	1.12103	-1.40691	Detected		PREDICTED: Homo sapiens uncharacterized LOC102723672 (LOC102723672), ncRNA [XR_426123]	AAATAATGGCTTCAGCAAGAAACAAGGCAGGAAAGTGCAGTGACATGAGGACCATACAGG	ENST00000480919		XR_426123
A_21_P0009236	0.0015292	0.0337835	12.343	3.62562	12.343	up	50.6298	6.19855	46.2608	3.58464	52.9272	3.45544	1.93845	-1.40339	1.40339	-2.37097	1.48444	-2.27621	Detected			CTCTTCAAAAAGAGACAGTGAAATACTCTTGAGATGAATCCAGGTATTAAAAAGTTCAGG	ENST00000584721
A_21_P0007814	0.00772706	0.0499806	9.07519	3.18193	9.07519	up	228.427	26.3872	221.359	20.7563	200.592	28.8571	2.01593	-1.40976	1.56572	-1.93352	1.31043	-1.31043	Detected			GAGAGCGTTTGGAACCAGACGGGAGTGAGGGTCACTCAACATCGCAAATGGACTAAATGC	ENST00000613771
A_33_P3364498	0.00253513	0.0370568	5.46394	2.44994	5.46394	up	1569.61	359.331	2079.61	466.247	3401.76	473.21	1.03574	-1.40315	1.03678	-1.20484	1.63358	-1.03574	Detected			AAGTACTAAACAGTCCCGACCCTGCTTAGCTTCAACAGATCAGAGGCGAGCCGGCGCGTT
A_33_P3348086	0.00774602	0.0499806	5.06999	2.34198	5.06999	up	77.9589	15.7317	56.4742	15.6402	92.8327	14.845	1.74544	-0.875458	0.875458	-1.06135	1.47933	-0.988914	Detected		ENK5_HUMAN (Q902F9) HERV-K_19p13.11 provirus ancestral Env polyprotein precursor (Envelope polyprotein) (HERV-K113 envelope protein) (EnvK5 protein) [Contains: Surface protein (SU); Transmembrane protein (TM)], partial (16%) [THC2503284]	TCAGAAGAACAGATGAAGTTACAATCCACCAAGGAAAAGGCACATGTGGAGAGTCAGGGA
A_33_P3312676	0.00136688	0.0332716	4.96526	2.31187	4.96526	up	641.664	157.124	791.812	154.414	781.299	155.667	1.28788	-1.0539	1.18635	-1.25647	1.0539	-1.0971	Detected		myelin transcription factor 1 [Source:RefSeq peptide;Acc:NP_004526] [ENST00000621996]	GTTGGGCCATGCTGGCTCTTTCATTGCATTGCGGAATTGAGATTTTCGTGTGTTTTATAA	ENST00000621996		BC062313
A_21_P0014614	0.00129915	0.0332716	26.6182	4.73434	26.6182	up	75.2405	2.88336	223.056	8.73948	87.3251	3.59159	1.94919	-3.06836	3.11214	-1.64604	1.64604	-2.78125	Detected			ACAGAGGTGGGCTGTGCCAGTCGAGATATAGACCTCACGTAGTCATCCAGGCTAGGAGAG
A_33_P3304402	0.00272447	0.0376763	20.1173	4.33036	20.1173	up	126.402	5.73245	377.817	24.4972	178.659	8.69163	1.43776	-3.33683	2.61256	-1.41891	1.41891	-2.76612	Detected			AGCTCTGATATGAGAGCACGTGTCTACTCAGCACTGAGAGTGGTGCTCAGGGCTGCCTGT
A_33_P3404346	0.00541456	0.0447722	7.07329	2.82238	7.07329	up	20.965	4.47858	52.2133	5.90455	31.0314	4.22756	1.15871	-1.38002	2.07028	-1.15871	1.20642	-1.493	Detected			CACTCTTGCAGATAAGAGGATAAGGCCTCTTCAGCTTGTTCACAGCAGCTGAAAAGCAAA
A_21_P0003965	0.0017597	0.034511	6.73862	2.75245	6.73862	up	15.8075	2.48409	18.9691	3.29088	23.0222	3.21418	1.39077	-1.59091	1.24894	-1.36263	1.41515	-1.24894	Detected			CAATTTTAATGGAGCATGAAGATTTACCTACATATTAGAGGCATTCTACAACCTTGGATG	ENST00000511758
A_33_P3384913	0.00716139	0.0485758	4.79616	2.26188	4.79616	up	23.6107	7.67267	32.1459	5.62202	38.468	7.14525	0.966751	-0.966751	1.00708	-1.59286	1.15294	-1.09925	Detected			TCTTTGAAAAACTCAAAAATTTTTATATGGACAGGTCCTCTAAGTATGCAAATATAGAAA
A_33_P3231156	0.00176178	0.034511	96.0498	6.58571	96.0498	up	20612.5	183.921	26010.4	316.882	34029.6	411.453	3.02878	-4.09137	2.95949	-3.48398	3.23402	-2.95949	Detected		metallothionein 1C, pseudogene [Source:HGNC Symbol;Acc:HGNC:7395] [ENST00000567054]	TCCTGCACTTATGCCAGCTTCTGCAAATGCAAAGAGTACAAATGCACCTCTTGCAAGAAG	ENST00000567054
A_33_P3336557	0.00172616	0.0342802	4.98095	2.31642	4.98095	up	180.892	40.297	244.23	58.5546	249.442	44.017	1.08554	-1.39271	1.11378	-1.03107	1.03107	-1.29508	Detected			CTGTGTGTTTCAAAAGCTCCAAGTGTTTACATTCTCCGATTCATCATTCCTTCTTCTAAT	ENST00000424493
A_21_P0008246	0.00391233	0.0407831	6.78618	2.7626	6.78618	up	116.068	17.9067	123.256	24.2846	121.367	14.8799	1.59992	-1.40835	1.28173	-1.14628	1.14628	-1.70524	Detected			GAAAATGGGCTTCAGTTTTCAAGTCTGCAGCTGAGTTGGGAAGTTGCGGACAGTAACCAG	ENST00000620494
A_33_P3347035	0.00459732	0.0425207	4.53421	2.18085	4.53421	up	92.7332	29.8399	143.085	27.6416	108.66	21.8393	1.11854	-0.829167	1.33939	-1.11704	0.829167	-1.30924	Detected		Homo sapiens cDNA clone IMAGE:7262526, with apparent retained intron. [BC069659]	GAATTAACTGCAGCCATCTTTGAAAAAGTTCACCACACCCACAGATTCAGATTTCTGTGA			BC069659
A_24_P177553	0.00354031	0.0400246	4.87632	2.28579	4.87632	up	85.533	21.3697	123.539	23.0382	126.106	27.1865	0.997608	-1.31517	1.12316	-1.38418	1.03966	-0.997608	Detected		AGENCOURT_10615922 NIH_MGC_141 Homo sapiens cDNA clone IMAGE:6744194 5', mRNA sequence [BU963192]	CAGGGAGAAAGAAGGGTTATTAACATTAAAAGAACTTGCAGTAATTCCTTTTTCTCTTCC			BU963192
A_33_P3245650	0.0058322	0.0458021	27.0594	4.75806	27.0594	up	98.0202	2.74985	89.4276	4.0421	78.9214	3.65857	2.95802	-2.50949	2.4208	-2.13121	2.12733	-2.12733	Detected			ACATCGCTAATGAGGACACCATACAAGGCATCGGTAATGAGGACGTTGTATATGACATCG	ENST00000619172		XM_006726815

## Sheet: Down expressed genes
Supplementary Table 1: List of the down-expressed genes (FC≥4; p≤0.008; corrected p≤0.05) in the ZnO NPs-treated K562 cells compared with untreated K562 cells.
# Notes : Fold change >= 4.0
#Entity List : T Test paired p (Corr) ( Treated] vs [[Not treated] ) cut-off = 0.05
#Interpretation : Treatment (Non-averaged)
#Fold-Change cut-off : 4.0
#Pairing option : All against single condition
#Condition pairs :
#[Treated] vs [Not treated]
#Minimum number of pairs:1 out of 1 condition pairs.
# Technology : Agilent.SingleColor.39494
# Owner : gxuser
# Created On : Thu Nov 07 14:44:00 AST 2019
ProbeName	p ( [Treated] vs [Not treated] )	p (Corr) ( [Treated] vs [Not treated] )	FC ([Treated] vs [Not treated])	Log FC ([Treated] vs [Not treated])	FC (abs) ([Treated] vs [Not treated])	Regulation ([Treated] vs [Not treated])	SG14234408_253949440636_S001_GE1_1200_Jun14_1_3.txt:gProcessedSignal(raw)	SG14234408_253949440636_S001_GE1_1200_Jun14_2_1.txt:gProcessedSignal(raw)	SG14234408_253949440637_S001_GE1_1200_Jun14_1_3.txt:gProcessedSignal(raw)	SG14234408_253949440637_S001_GE1_1200_Jun14_2_1.txt:gProcessedSignal(raw)	SG14234408_253949440638_S001_GE1_1200_Jun14_1_3.txt:gProcessedSignal(raw)	SG14234408_253949440638_S001_GE1_1200_Jun14_2_1.txt:gProcessedSignal(raw)	SG14234408_253949440636_S001_GE1_1200_Jun14_1_3.txt:gProcessedSignal(normalized)	SG14234408_253949440636_S001_GE1_1200_Jun14_2_1.txt:gProcessedSignal(normalized)	SG14234408_253949440637_S001_GE1_1200_Jun14_1_3.txt:gProcessedSignal(normalized)	SG14234408_253949440637_S001_GE1_1200_Jun14_2_1.txt:gProcessedSignal(normalized)	SG14234408_253949440638_S001_GE1_1200_Jun14_1_3.txt:gProcessedSignal(normalized)	SG14234408_253949440638_S001_GE1_1200_Jun14_2_1.txt:gProcessedSignal(normalized)	GeneSymbol	Description	Sequence	EnsemblID	EntrezGeneID	GenbankAccession	GeneName
A_33_P3220919	0.00404037	0.0410826	-4.78067	-2.25721	4.78067	down	377.536	2339.57	572.275	2398.12	484.011	2371.82	-1.18656	1.13314	-0.991326	0.991326	-1.34617	1.12313	ADRBK2	Homo sapiens adrenergic, beta, receptor kinase 2 (ADRBK2), mRNA [NM_005160]	CAGTTACTTTGGAGCTGCTAGACTGGTTTTCTGTGTTGGTAAATTGCCTATATAAATCTG	ENST00000324198	157	NM_005160	adrenergic, beta, receptor kinase 2
A_33_P3380196	0.00172443	0.0342802	-4.90803	-2.29514	4.90803	down	4.51963	31.3951	6.39556	31.6349	8.75442	35.0836	-1.37684	1.10756	-1.28084	0.941066	-0.941066	1.23806	AKAP9	Homo sapiens A kinase (PRKA) anchor protein (yotiao) 9, mRNA (cDNA clone IMAGE:3914749), complete cds. [BC015533]	AGTTTTTAAGATAATAGTCATTACTGAGTTCCCTAAAAGTGATCAGCCTATGTTAAACTG		10142	BC015533	A kinase (PRKA) anchor protein 9
A_23_P36305	0.000425085	0.030619	-5.34569	-2.41838	5.34569	down	1366.4	8525.67	1497.56	8995.55	1799.51	8542.33	-1.11475	1.21482	-1.38738	1.11475	-1.23556	1.18788	ATG16L2	Homo sapiens autophagy related 16-like 2 (S. cerevisiae) (ATG16L2), mRNA [NM_033388]	TGGCAGGACCTGGCCTGTTTGTTTAAAAATGAAGTATGGGTTGGGGGATTACGCTAGTTT	ENST00000536995	89849	NM_033388	autophagy related 16-like 2 (S. cerevisiae)
A_23_P128974	0.00120162	0.0328838	-4.478	-2.16286	4.478	down	90.6624	535.574	121.135	518.603	108.951	450.537	-0.992312	1.25834	-0.979133	1.03441	-1.24525	0.979133	BATF	Homo sapiens basic leucine zipper transcription factor, ATF-like (BATF), mRNA [NM_006399]	TATTAAGAAAGATGCTCAAGTCCCATGGCACAGAGCAAGGCGGGCAGGGAACGGTTATTT	ENST00000286639	10538	NM_006399	basic leucine zipper transcription factor, ATF-like
A_23_P85800	0.000124294	0.0298991	-5.6663	-2.50241	5.6663	down	4354	30204.6	4926.26	28883.7	5705.56	29722.2	-1.12025	1.36224	-1.34697	1.12025	-1.24826	1.30925	CD52	Homo sapiens CD52 molecule (CD52), mRNA [NM_001803]	TGCCAGACATCACCAGGTTGTAGAAGTTGACAGGCAGTGCCATGGGGGCAACAGCCAAAA	ENST00000374213	1043	NM_001803	CD52 molecule
A_33_P3376965	0.00073466	0.0322202	-4.25646	-2.08965	4.25646	down	56.1334	274.859	66.3174	305.669	76.9851	306.367	-0.977852	1.00204	-1.14219	0.977852	-1.04017	1.12886	CHAC1	Homo sapiens ChaC glutathione-specific gamma-glutamylcyclotransferase 1 (CHAC1), transcript variant 1, mRNA [NM_024111]	TTCTCCGGCCACAACCTTGAATACTTGCTGCGTCTGGCAGACTTCATGCAGCTCTGTGGG	ENST00000444189	79094	NM_024111	ChaC glutathione-specific gamma-glutamylcyclotransferase 1
A_23_P50250	0.00409672	0.0410826	-6.02568	-2.59112	6.02568	down	15.211	120.62	23.8133	121.803	17.9792	112.952	-1.37691	1.29851	-1.13512	1.13512	-1.65373	1.17399	CKM	Homo sapiens creatine kinase, muscle (CKM), mRNA [NM_001824]	ACACTCGGAGCTTGTGCTTTGTCTCCACGCAAAGCGATAAATAAAAGCATTGGTGGCCTT	ENST00000221476	1158	NM_001824	creatine kinase, muscle
A_23_P112554	0.000489441	0.0312935	-7.93443	-2.98813	7.93443	down	52.5949	544.756	67.1751	588.896	89.8364	575.592	-1.62501	1.43574	-1.67688	1.37067	-1.37067	1.48541	COL15A1	Homo sapiens collagen, type XV, alpha 1 (COL15A1), mRNA [NM_001855]	TCATATTTTAGTATGGTGTCTGTTTATGTAACTCTGACTTGCTGGAAAAGTTGAAACTCC	ENST00000375001	1306	NM_001855	collagen, type XV, alpha 1
A_24_P277934	0.00758459	0.0497287	-6.73839	-2.7524	6.73839	down	26.8309	298.879	57.2593	305.419	41.7312	250.277	-1.78434	1.38139	-1.09559	1.23514	-1.66515	1.09559	COL1A2	Homo sapiens collagen, type I, alpha 2 (COL1A2), mRNA [NM_000089]	CCTGAAAAAGGCTGTCATTCTACAGGGCTCTAATGATGTTGAACTTGTTGCTGAGGGCAA	ENST00000464916	1278	NM_000089	collagen, type I, alpha 2
A_33_P3280385	0.00367877	0.0403971	-9.43898	-3.23863	9.43898	down	2.63409	34.9788	2.74539	31.8453	5.85156	37.2077	-1.86993	1.54931	-2.21509	1.23644	-1.23644	1.60868	COL6A3	Homo sapiens collagen, type VI, alpha 3 (COL6A3), transcript variant 3, mRNA [NM_057165]	CTTGGAGCATTTTCCATATGAAAAATAACAGGCTCAAAGGCCATGGTACTCATAATAAAT		1293	NM_057165	collagen, type VI, alpha 3
A_23_P40108	0.00285589	0.0380005	-5.53834	-2.46945	5.53834	down	215.731	1571.87	334.047	1639.05	249.434	1380.4	-1.28106	1.27226	-1.05511	1.15517	-1.58967	1.05511	COL9A3	Homo sapiens collagen, type IX, alpha 3 (COL9A3), mRNA [NM_001853]	TCAAAAGGCCCTAGCTAATAAACCTGTAAGCCCAGCATTTGAGAGAAGGTAGGGTGTGTA	ENST00000466192	1299	NM_001853	collagen, type IX, alpha 3
A_24_P408704	0.00246694	0.03682	-10.5098	-3.39367	10.5098	down	33.0065	417.39	34.3331	475.082	58.968	455.626	-1.83393	1.51478	-2.18194	1.52409	-1.51478	1.61147	DOCK2	Homo sapiens dedicator of cytokinesis 2 (DOCK2), mRNA [NM_004946]	CGGAGGTCCAAGAAGAGGACAAAGAGAAGCAGCGTAGTTTTTGCGGATGAGAAAGCAGCT	ENST00000524185	1794	NM_004946	dedicator of cytokinesis 2
A_23_P63390	0.00170998	0.0341785	-34.1899	-5.0955	34.1899	down	5.47751	273.122	10.8323	293.26	7.08092	244.164	-2.85772	2.47029	-2.27884	2.39546	-3.00534	2.27884	FCGR1B	Homo sapiens Fc fragment of IgG, high affinity Ib, receptor (CD64) (FCGR1B), transcript variant 1, mRNA [NM_001017986]	TTTAGTGAACACTGTTCTCTGGGTGACAATACGTAAAGAACTGAAAAGAAAGAAAAAGTG	ENST00000466915	2210	NM_001017986	Fc fragment of IgG, high affinity Ib, receptor (CD64)
A_21_P0010561	0.0040867	0.0410826	-30.6099	-4.93593	30.6099	down	6.02925	166.845	4.69989	137.448	3.55523	146.742	-2.01072	2.46781	-2.77493	2.01072	-3.29078	2.25282	FCGR1B	Homo sapiens Fc fragment of IgG, high affinity Ib, receptor (CD64) (FCGR1B), transcript variant 3, mRNA [NM_001244910]	AGTTTTTCCACTGGAATTCTAACCTCACCATTCTGAAAACCAACATAAGTCACAATGGCA	ENST00000579737	2210	NM_001244910	Fc fragment of IgG, high affinity Ib, receptor (CD64)
A_21_P0010728	0.0045559	0.042414	-18.3829	-4.20029	18.3829	down	6.58135	187.622	14.6383	192.555	7.95034	153.391	-2.47475	2.04669	-1.72632	1.90666	-2.72015	1.72632	FCGR1B	Homo sapiens Fc fragment of IgG, high affinity Ib, receptor (CD64) (FCGR1B), transcript variant 3, mRNA [NM_001244910]	GCTCAGGCAAGGGAAAGCATCACTACACATCAGCAGGAATATCACAATACACTGTGAAAG	ENST00000579737	2210	NM_001244910	Fc fragment of IgG, high affinity Ib, receptor (CD64)
A_23_P85716	0.000178777	0.0298991	-8.9329	-3.15913	8.9329	down	1064.28	12430.4	1200.47	11341.6	1377.42	10363.2	-1.46217	1.77189	-1.69332	1.46217	-1.60812	1.47973	FCGR2A	Homo sapiens Fc fragment of IgG, low affinity IIa, receptor (CD32) (FCGR2A), transcript variant 2, mRNA [NM_021642]	ATGGAGACTGGAAAAATCCTGAGCAAACAAAACCACCTGGCCCTTAGAAATAGCTTTAAC	ENST00000471026	2212	NM_021642	Fc fragment of IgG, low affinity IIa, receptor (CD32)
A_23_P34644	0.000150152	0.0298991	-18.4045	-4.20198	18.4045	down	49.3614	1204.06	68.2983	1321.86	75.2766	1157.7	-2.15045	2.14607	-2.08685	2.10326	-2.05966	2.05966	FCGR2B	Homo sapiens Fc fragment of IgG, low affinity IIb, receptor (CD32) (FCGR2B), transcript variant 1, mRNA [NM_004001]	AATCCCACTAATCCTGATGAGGCTGACAAAGTTGGGGCTGAGAACACAATCACCTATTCA	ENST00000428605	2213	NM_004001	Fc fragment of IgG, low affinity IIb, receptor (CD32)
A_33_P3327617	0.000438464	0.0307948	-9.73976	-3.28389	9.73976	down	347.776	4563.87	459	4745.72	534.686	4240.56	-1.68445	1.71772	-1.68898	1.59661	-1.58195	1.58195	FCGR2B	Homo sapiens Fc fragment of IgG, low affinity IIb, receptor (CD32) (FCGR2B), transcript variant 3, mRNA [NM_001002274]	TGCACAGGAAACATAGGCTACACGCTGTACTCATCCAAGCCTGTGACCATCACTGTCCAA	ENST00000485778	2213	NM_001002274	Fc fragment of IgG, low affinity IIb, receptor (CD32)
A_33_P3403576	0.000552114	0.0319891	-10.5744	-3.40251	10.5744	down	1130.7	14868.8	1447.48	17848.4	2001.31	16997	-1.85542	1.54972	-1.90395	1.63576	-1.54972	1.71296	FCGR2C	Homo sapiens Fc fragment of IgG, low affinity IIc, receptor for (CD32) (gene/pseudogene) (FCGR2C), transcript variant 1, mRNA [NM_201563]	AAGAGCCCAATTACCAGAACCACATTAAGTCTCCATTGTTTTGCCTTGGGATTTGAGAAG	ENST00000271450	9103	NM_201563	Fc fragment of IgG, low affinity IIc, receptor for (CD32) (gene/pseudogene)
A_24_P276576	0.000561177	0.0319891	-37.9287	-5.24522	37.9287	down	2.70753	109.798	2.46719	99.2267	2.75008	107.153	-2.35317	2.67669	-2.89215	2.35317	-2.84871	2.61176	FCRLA	Homo sapiens Fc receptor-like A (FCRLA), transcript variant 2, mRNA [NM_032738]	TCTGCTGTCTAGATCAGGAATTTCTATCTGTTATATCGACCAGAATGTTGTGATTTAAAG	ENST00000367950	84824	NM_032738	Fc receptor-like A
A_23_P46039	0.00149515	0.0337255	-14.2308	-3.83094	14.2308	down	49.9552	746.715	41.7527	759.793	55.5794	685.831	-1.71876	1.87123	-2.38239	1.7188	-2.08288	1.71876	FCRLA	Homo sapiens Fc receptor-like A (FCRLA), transcript variant 2, mRNA [NM_032738]	GACATACCAGTCTTTAGCTGGTGCTATGGTCTGTTCTTTAGTTCTAGTTTGTATCCCCTC	ENST00000236938	84824	NM_032738	Fc receptor-like A
A_23_P408249	0.00362985	0.0402172	-4.1856	-2.06543	4.1856	down	31.6956	139.099	31.7725	148.487	38.6327	160.867	-0.869324	0.952572	-1.27069	0.869324	-1.10182	1.13257	PCK1	Homo sapiens phosphoenolpyruvate carboxykinase 1 (soluble) (PCK1), mRNA [NM_002591]	GAACACTGGGTAGTAGCTAATGAAATTGAGAAGGGAAATCTTAGCATGCCTCCAAAAATT	ENST00000467047	5105	NM_002591	phosphoenolpyruvate carboxykinase 1 (soluble)
A_33_P3304170	0.00774755	0.0499806	-9.27326	-3.21308	9.27326	down	268.64	3978.02	257.346	2901.47	567.178	3155.17	-1.7519	1.82454	-2.21873	1.19181	-1.19181	1.46045	PIK3CG	Homo sapiens phosphatidylinositol-4,5-bisphosphate 3-kinase, catalytic subunit gamma (PIK3CG), transcript variant 1, mRNA [NM_002649]	TTAATGTGTGCAAAAGCCCAAAGGTTCCTAAGCCTGGCTGCAAAGAAGAATCAACAGGGA	ENST00000496166	5294	NM_002649	phosphatidylinositol-4,5-bisphosphate 3-kinase, catalytic subunit gamma
A_23_P12392	0.00640956	0.0471011	-12.3857	-3.6306	12.3857	down	2.3024	45.9838	7.00617	61.772	3.70899	46.6103	-2.59922	1.40883	-1.3986	1.65719	-2.42936	1.3986	PTPRC	Homo sapiens protein tyrosine phosphatase, receptor type, C (PTPRC), transcript variant 4, non-coding RNA [NR_052021]	GGTAATGCACAATTCCAACTAACGTACATTCAACAGATCATGAAATTGGGTTATTAAAAT	ENST00000367364	5788	NR_052021	protein tyrosine phosphatase, receptor type, C
A_33_P3364811	0.00196592	0.0353758	-7.88057	-2.9783	7.88057	down	209.308	2029.47	212.001	1518.34	214.824	1763.31	-1.18473	1.78081	-1.57115	1.18473	-1.66524	1.54824	PTPRC	Homo sapiens protein tyrosine phosphatase, receptor type, C (PTPRC), transcript variant 1, mRNA [NM_002838]	TCCATATCTCATAATTCATGTACTGCTCCTGATAAGACATTAATATTAGATGTGCCACCA	ENST00000367379	5788	NM_002838	protein tyrosine phosphatase, receptor type, C
A_33_P3364821	0.000989833	0.0322856	-5.6139	-2.489	5.6139	down	2130.45	13549.8	1561.87	9248.65	2044.63	11187.1	-0.814374	1.5428	-1.66712	0.814374	-1.39172	1.23661	PTPRC	Homo sapiens protein tyrosine phosphatase, receptor type, C (PTPRC), transcript variant 1, mRNA [NM_002838]	GTTGTTGTAAAGATCAACCAGCACAAAAGATGTCCAGATTACATCATTCAGAAATTGAAC	ENST00000529828	5788	NM_002838	protein tyrosine phosphatase, receptor type, C
A_33_P3309526	0.00100652	0.0322856	-4.20181	-2.07101	4.20181	down	572.772	3227.97	830.68	3415.05	839.223	3129.51	-1.109	1.07373	-0.977536	0.977536	-1.07594	0.999279	PTPRC	Homo sapiens protein tyrosine phosphatase, receptor type, C (PTPRC), transcript variant 1, mRNA [NM_002838]	AACTTCTTTGTAATCGTTATGTGTGTATATGTATGTGTGTATGGGTGTGTGTTTGTGTGA	ENST00000442510	5788	NM_002838	protein tyrosine phosphatase, receptor type, C
A_23_P158725	0.00245976	0.0368015	-4.42634	-2.14612	4.42634	down	863.528	4555.7	1095.07	4637.44	1045.03	4724.42	-0.96784	1.11965	-1.03	0.96784	-1.21065	1.14236	SLC16A3	Homo sapiens solute carrier family 16 (monocarboxylate transporter), member 3 (SLC16A3), transcript variant 2, mRNA [NM_001042422]	GTCTTGGGGACAGCTCTTTCCACCCCTGGAAGATGGAAATAAACCTGCGTGTGGGTGGAG	ENST00000582743	9123	NM_001042422	solute carrier family 16 (monocarboxylate transporter), member 3
A_23_P119778	0.000483587	0.0312935	-7.10103	-2.82803	7.10103	down	48.6223	466.774	92.8788	677.295	79.9289	476.145	-1.73948	1.21169	-1.21061	1.57128	-1.54041	1.21061	SLC39A10	Homo sapiens solute carrier family 39 (zinc transporter), member 10 (SLC39A10), transcript variant 2, mRNA [NM_020342]	TAGATTATTGCCAGTGTCTTTTCTGTATGCTATAAGCAAGGGAGCTTAGGTGTTATTTCT	ENST00000409086	57181	NM_020342	solute carrier family 39 (zinc transporter), member 10
A_21_P0000624	0.00200918	0.0355173	-4.3308	-2.11463	4.3308	down	59.5948	355.999	71.2697	289.993	78.7986	306.693	-0.896713	1.37004	-1.04348	0.896713	-1.01176	1.1252	SLC6A13	Homo sapiens solute carrier family 6 (neurotransmitter transporter), member 13 (SLC6A13), transcript variant 3, mRNA [NM_001243392]	GATAACCAAACTGTTCTGTGGTCTTAAGTAATAAATAGTAGCTCTGCTGATGATGACGTT		6540	NM_001243392	solute carrier family 6 (neurotransmitter transporter), member 13
A_23_P70398	0.00420739	0.0413789	-4.04214	-2.01512	4.04214	down	4705.29	21515.3	4108.12	16109.2	4019.17	17241.7	-0.643096	1.23805	-1.24377	0.643096	-1.38852	0.888827	VEGFA	Homo sapiens vascular endothelial growth factor A (VEGFA), transcript variant 6, mRNA [NM_001025370]	CCAGCACATAGGAGAGATGAGCTTCCTACAGCACAACAAATGTGAATGCAGACCAAAGAA	ENST00000518538	7422	NM_001025370	vascular endothelial growth factor A
A_23_P54918	0.000229546	0.0298991	-4.68852	-2.22913	4.68852	down	86.5247	497.401	106.709	555.051	109.187	438.313	-0.999576	1.21178	-1.10194	1.19252	-1.182	0.999576	LDHD	Homo sapiens lactate dehydrogenase D (LDHD), transcript variant 1, mRNA [NM_153486]	CCCTTCACCTGGTGACAGGAACACTCCTTTCCTGGTATGGAACGTGAGCTCCCGTGACAT	ENST00000450168	197257	NM_153486	lactate dehydrogenase D
A_24_P270033	0.000605794	0.0319891	-5.22987	-2.38678	5.22987	down	60.9923	424.534	86.75	481.87	113.006	486.944	-1.42949	1.05783	-1.32612	1.06312	-1.05783	1.22594	MPZL3	Homo sapiens myelin protein zero-like 3 (MPZL3), transcript variant 1, mRNA [NM_198275]	GGGCCATATGCACAAATATTGTAACTCTTGGTATCTTTACTGCATCATAGTCAATAAACT	ENST00000278949	196264	NM_198275	myelin protein zero-like 3
A_23_P329573	0.000231359	0.0298991	-9.77103	-3.28851	9.77103	down	7.97287	96.7044	9.58903	93.552	13.0164	119.51	-1.62619	1.66235	-1.76477	1.43707	-1.43707	1.93808	ITGB2	Homo sapiens integrin, beta 2 (complement component 3 receptor 3 and 4 subunit) (ITGB2), transcript variant 1, mRNA [NM_000211]	GCCAATTTATTTACATTTAAACTTGTCAGGGTATAAAATGACATCCCATTAATTATATTG	ENST00000302347	3689	NM_000211	integrin, beta 2 (complement component 3 receptor 3 and 4 subunit)
A_24_P260101	0.00205717	0.0358057	-8.56033	-3.09767	8.56033	down	49.2955	583.161	75.7563	750.409	88.2386	550.139	-1.73028	1.52222	-1.51524	1.70853	-1.40836	1.40836	MME	Homo sapiens membrane metallo-endopeptidase (MME), transcript variant 2b, mRNA [NM_007289]	GACATATCTCTAATTCCATCCATAAATCCAGTTCTACTATGGCTGAGTTCTGGTCAAAGA	ENST00000460393	4311	NM_007289	membrane metallo-endopeptidase
A_33_P3370094	0.00147984	0.0336772	-8.25498	-3.04527	8.25498	down	63.3684	729.017	72.463	542.232	67.7979	515.981	-1.30387	1.90838	-1.51525	1.30387	-1.72443	1.37999	MME	Homo sapiens membrane metallo-endopeptidase (MME), transcript variant 2b, mRNA [NM_007289]	ATGAATCCAGAAAAGAAGTGCCGGGTTTGGTGATCTTCAAAAGAAGCATTGCAGCCCTTG	ENST00000360490	4311	NM_007289	membrane metallo-endopeptidase
A_23_P128919	0.000402772	0.0300787	-5.35466	-2.4208	5.35466	down	522.931	3316.72	541.73	3019.32	596.419	3016.9	-1.0201	1.3331	-1.37401	1.0201	-1.34843	1.16665	LGALS3	Homo sapiens lectin, galactoside-binding, soluble, 3 (LGALS3), transcript variant 1, mRNA [NM_002306]	GGAAACCATTCAAAATACAAGTACTGGTTGAACCTGACCACTTCAAGGTTGCAGTGAATG	ENST00000254301	3958	NM_002306	lectin, galactoside-binding, soluble, 3
A_32_P176911	0.0020484	0.035747	-5.30892	-2.40842	5.30892	down	258.708	1672.09	336.922	1681.63	294.272	1589.71	-1.10557	1.27482	-1.12934	1.10557	-1.43778	1.17218	LINC00239	Homo sapiens long intergenic non-protein coding RNA 239 (LINC00239), long non-coding RNA [NR_026774]	GGACTCTGGAGATAAAACCTCATTGCAAGGCTACCTTTGCCACTGTATCTTAGCAGCTTT	ENST00000556973	145200	NR_026774	long intergenic non-protein coding RNA 239
A_23_P61149	0.000915493	0.0322856	-6.56246	-2.71424	6.56246	down	288.503	2097.56	288.328	2136.67	361.155	2206.39	-1.19969	1.3505	-1.60542	1.19969	-1.39369	1.39372	INPP5D	Homo sapiens inositol polyphosphate-5-phosphatase, 145kDa (INPP5D), transcript variant 1, mRNA [NM_001017915]	TGTTGCTTTTTCAACATAGCAGAATTAATGTAGGGAGCTAAATCCAGTGGTGTGTGTGAA	ENST00000445964	3635	NM_001017915	inositol polyphosphate-5-phosphatase, 145kDa
A_23_P13907	0.000683614	0.0319891	-12.3119	-3.62198	12.3119	down	145.238	2384.9	208.191	2383.72	176.553	2041.12	-1.79294	1.93264	-1.67831	1.75445	-2.02929	1.67831	IGF1	Homo sapiens insulin-like growth factor 1 (somatomedin C) (IGF1), transcript variant 4, mRNA [NM_000618]	CAAGTAGAGGGAGTGCAGGAAACAAGAACTACAGGATGTAGGAAGACCCTCCTGAGGAGT	ENST00000481539	3479	NM_000618	insulin-like growth factor 1 (somatomedin C)
A_23_P153571	8.37164e-05	0.0285211	-20.3429	-4.34646	20.3429	down	2.31001	57.0094	5.12943	107.16	2.86222	54.4313	-2.48144	1.83193	-1.7354	2.56496	-2.69024	1.7354	IGFL2	Homo sapiens IGF-like family member 2 (IGFL2), transcript variant 1, mRNA [NM_001002915]	GAAAATCAACTTTCACTAAGGCATCTCAGAAACATAGGCTAAGGTAATATGTGTACCAGT	ENST00000600243	147920	NM_001002915	IGF-like family member 2
A_23_P16384	0.000601801	0.0319891	-8.17175	-3.03064	8.17175	down	31.4159	295.788	39.2949	332.242	33.6542	268.68	-1.37735	1.54579	-1.45937	1.53599	-1.79609	1.37735	NLRP7	Homo sapiens NLR family, pyrin domain containing 7 (NLRP7), transcript variant 1, mRNA [NM_139176]	ATCGCTCTACGAATTACACAGGAAGCGGGATTCGGGTCTCTAAGATGTCTTATGAATGCA	ENST00000592784	199713	NM_139176	NLR family, pyrin domain containing 7
A_24_P270728	0.000912408	0.0322856	-14.3205	-3.84001	14.3205	down	593.351	11041.7	707.476	11999.8	859.996	9319.45	-1.82454	2.08153	-1.97561	2.02411	-1.80713	1.80713	NUPR1	Homo sapiens nuclear protein, transcriptional regulator, 1 (NUPR1), transcript variant 1, mRNA [NM_001042483]	TATTCCCGCTGACTGAGTCTCTGAGGGGCTACCAGGAAAGCGCCTCCAACCCTAGCAAAA	ENST00000324873	26471	NM_001042483	nuclear protein, transcriptional regulator, 1
A_23_P128201	0.000212378	0.0298991	-4.61335	-2.20581	4.61335	down	123.703	709.956	146.745	689.9	174.95	741.468	-0.995085	1.2139	-1.15353	0.995085	-1.01305	1.24679	NCKAP1L	Homo sapiens NCK-associated protein 1-like (NCKAP1L), transcript variant 1, mRNA [NM_005337]	CATTTCTTATGGGTCCCATTGAGTGCTTGAAGGAGTTTGTCACTCCAGACACAGACATCA	ENST00000548221	3071	NM_005337	NCK-associated protein 1-like
A_33_P3281283	0.00234757	0.0365542	-5.87995	-2.5558	5.87995	down	14.7025	110.903	17.0138	90.1511	19.0499	112.849	-1.06347	1.53982	-1.25769	1.06347	-1.20778	1.53517	S1PR3	Homo sapiens sphingosine-1-phosphate receptor 3 (S1PR3), mRNA [NM_005226]	GCTGCAGAGAAACTATGCATTAGGTCTCTTTTCAATTAGAAACCTTTACTATTTCCAATG	ENST00000375846	1903	NM_005226	sphingosine-1-phosphate receptor 3
A_19_P00322409	0.00693586	0.0482195	-4.2539	-2.08878	4.2539	down	26.3988	161.984	28.0073	138.181	45.2807	134.095	-1.07954	1.22591	-1.39907	0.819145	-0.819145	0.923547	STXBP5-AS1	Homo sapiens STXBP5 antisense RNA 1 (STXBP5-AS1), long non-coding RNA [NR_034115]	TTCAATTGAATGATTTTACACAGTGGCACAGTTTCAGGTATGTTGCTAAGCAGGAAAGTT		729178	NR_034115	STXBP5 antisense RNA 1
A_23_P147918	0.00390206	0.0407831	-6.13457	-2.61696	6.13457	down	53.4334	507.065	103.297	573.027	92.2378	471.112	-1.67238	1.26212	-1.12626	1.26108	-1.40279	1.12626	S100A16	Homo sapiens S100 calcium binding protein A16 (S100A16), mRNA [NM_080388]	TGTTCAGTCTCATCTAACCTTCCAATGTCTGATGTTCCTGCCAAATTCCTGCCTGATTCT	ENST00000368703	140576	NM_080388	S100 calcium binding protein A16
A_23_P58266	0.000303016	0.0298991	-10.8454	-3.43901	10.8454	down	2618.54	34242.4	3326.17	36281.5	3258.18	33936.9	-1.65153	1.74555	-1.7113	1.65153	-1.85426	1.70286	S100P	Homo sapiens S100 calcium binding protein P (S100P), mRNA [NM_005980]	CCAAAAGTGTTTGTTGGCAATTATTCCCCTAGGCTGAGCCTGCTCATGTACCTCTGATTA	ENST00000296370	6286	NM_005980	S100 calcium binding protein P
A_23_P372848	0.0017333	0.0343339	-7.24715	-2.85741	7.24715	down	63.034	666.346	99.9093	730.064	108.868	624.778	-1.61893	1.47127	-1.35931	1.42555	-1.34859	1.34859	P2RX1	Homo sapiens purinergic receptor P2X, ligand gated ion channel, 1 (P2RX1), mRNA [NM_002558]	ACAACCCAGTGTACACACCACCTACGTGCACACAGCATCCTTCCACACTGTGTATGTGAA	ENST00000572418	5023	NM_002558	purinergic receptor P2X, ligand gated ion channel, 1
A_33_P3263867	0.00712702	0.0485359	-11.2001	-3.48545	11.2001	down	53.7351	860.616	123.169	976.461	68.4347	881.956	-2.24071	1.44886	-1.44886	1.45358	-2.40988	1.45444	P2RX7	Homo sapiens purinergic receptor P2X, ligand-gated ion channel, 7 (P2RX7), transcript variant 1, mRNA [NM_002562]	AGTTTCAGATCCTGATCTTAAGAGGCTGACAGCTTCTACTTGCTGTCCCTTGGAACTCTT	ENST00000261826	5027	NM_002562	purinergic receptor P2X, ligand gated ion channel, 7
A_24_P340128	0.00305079	0.0383411	-38.2233	-5.25638	38.2233	down	2.825	142.856	2.84253	157.56	5.78249	134.178	-2.87176	2.47654	-3.26771	2.44041	-2.35636	2.35636	P2RY8	Homo sapiens purinergic receptor P2Y, G-protein coupled, 8 (P2RY8), mRNA [NM_178129]	AACACAGGTCTATTGACTCACACACATGTTTTAAGATGGAAAACTTTACTTCTGTTCTTG	ENST00000381297	286530	NM_178129	purinergic receptor P2Y, G-protein coupled, 8
A_23_P117582	0.000299559	0.0298991	-5.97575	-2.57912	5.97575	down	327.604	2488.55	451.084	2687.95	433.384	2379.53	-1.2878	1.32561	-1.23123	1.25934	-1.40214	1.23123	JDP2	Homo sapiens Jun dimerization protein 2 (JDP2), transcript variant 1, mRNA [NM_130469]	GGGGTGCATTTCCATCCTTGTAAACCCTTCATAGTACTCAGTCCTGTATCGCTCAGTAAA	ENST00000267569	122953	NM_130469	Jun dimerization protein 2
A_23_P368681	0.00154889	0.0338336	-5.77732	-2.5304	5.77732	down	26.7202	201.883	33.0653	220.466	40.6235	181.106	-1.25278	1.35288	-1.35025	1.30244	-1.16643	1.16643	GIMAP2	Homo sapiens GTPase, IMAP family member 2 (GIMAP2), mRNA [NM_015660]	ATGACCAAGTGAAGGAACTAATGGACTGTATTGAGGATCTGTTGATGGAGAAAAATGGTG	ENST00000223293	26157	NM_015660	GTPase, IMAP family member 2
A_33_P3362296	0.00480228	0.0430007	-13.6852	-3.77454	13.6852	down	8.4103	99.2884	5.17173	89.765	7.06491	102.921	-1.46329	1.78624	-2.56967	1.46329	-2.23281	1.80832	KCNG1	PREDICTED: Homo sapiens potassium voltage-gated channel, subfamily G, member 1 (KCNG1), transcript variant X2, mRNA [XM_006723786]	CCCACACAAGGTTTCCCAAAAATTTGACTTGGTTGCCAACAATAAAAGTGAAGTTTTTTC		3755	XM_006723786	potassium channel, voltage gated modifier subfamily G, member 1
A_23_P210581	0.00181918	0.0345911	-12.0423	-3.59004	12.0423	down	35.6308	434.012	38.0003	511.537	34.5651	428.748	-1.62365	1.67102	-1.93564	1.73065	-2.1855	1.62365	KCNG1	Homo sapiens potassium channel, voltage gated modifier subfamily G, member 1 (KCNG1), mRNA [NM_002237]	CCCTATGTGTGTTTCCCTCAATAAGGAGATGCCTTGTTCTTTTCACCATGCAAATAACAT	ENST00000506387	3755	NM_002237	potassium channel, voltage gated modifier subfamily G, member 1
A_33_P3306146	0.00212658	0.036029	-20.597	-4.36436	20.597	down	10.9195	288.428	17.3616	293.331	12.6453	288.364	-2.26117	2.1502	-1.99704	1.99704	-2.56751	2.12012	PLAU	Homo sapiens plasminogen activator, urokinase (PLAU), transcript variant 2, mRNA [NM_001145031]	TATAACGATCCCCAGTTTGGCACAAGCTGTGAGATCACTGGCTTTGGAAAAGAGAATTCT	ENST00000446342	5328	NM_001145031	plasminogen activator, urokinase
A_23_P24104	0.000124662	0.0298991	-16.4487	-4.0399	16.4487	down	272.859	5767.87	412.278	6755.35	384.695	5756.81	-2.12401	1.96594	-1.93341	2.01646	-2.14648	1.93341	PLAU	Homo sapiens plasminogen activator, urokinase (PLAU), transcript variant 1, mRNA [NM_002658]	CTGTGACCAGCACTGTCTCAGTTTCACTTTCACATAGATGTCCCTTTCTTGGCCAGTTAT	ENST00000446342	5328	NM_002658	plasminogen activator, urokinase
A_23_P214222	0.00356469	0.0401473	-5.11169	-2.3538	5.11169	down	64.6218	409.022	104.835	480.365	91.4144	490.318	-1.32169	1.02853	-1.02853	1.08301	-1.33932	1.26031	MARCKS	myristoylated alanine-rich protein kinase C substrate [Source:HGNC Symbol;Acc:HGNC:6759] [ENST00000612661]	AACTCCTGCTTAAGGTGTTCTAATTTTCTGTGAGCACACTAAAAGCGAAAAATAAATGTG	ENST00000612661	4082	D10522	myristoylated alanine-rich protein kinase C substrate
A_23_P420196	0.00159449	0.0339761	-8.24679	-3.04383	8.24679	down	177.072	1921.36	217.76	2121.25	273.594	1690.8	-1.51167	1.61618	-1.61813	1.5815	-1.402	1.402	SOCS1	Homo sapiens suppressor of cytokine signaling 1 (SOCS1), mRNA [NM_003745]	ACCTGAACTCGCACCTCCTACCTCTTCATGTTTACATATACCCAGTATCTTTGCACAAAC	ENST00000332029	8651	NM_003745	suppressor of cytokine signaling 1
A_33_P3303245	0.00139231	0.0332716	-17.9525	-4.16611	17.9525	down	2.293	42.4684	2.21444	42.0001	2.61725	50.2082	-1.85287	2.04634	-2.30803	1.85287	-2.18009	2.25812	KIT	Homo sapiens v-kit Hardy-Zuckerman 4 feline sarcoma viral oncogene homolog (KIT), transcript variant 2, mRNA [NM_001093772]	AGTTCAGCGAGAGTTAATGATTCTGGAGTGTTCATGTGTTATGCCAATAATACTTTTGGA	ENST00000288135	3815	NM_001093772	v-kit Hardy-Zuckerman 4 feline sarcoma viral oncogene homolog
A_23_P110253	0.00603429	0.0463695	-7.59163	-2.92441	7.59163	down	23.3956	245.108	46.5751	274.661	27.0041	222.727	-1.7489	1.32835	-1.16044	1.31511	-2.05999	1.16044	KIT	Homo sapiens v-kit Hardy-Zuckerman 4 feline sarcoma viral oncogene homolog (KIT), transcript variant 1, mRNA [NM_000222]	AAAGTGGTTGTTAGTTATAGATGTCTAGGTACTTCAGGGGCACTTCATTGAGAGTTTTGT	ENST00000288135	3815	NM_000222	v-kit Hardy-Zuckerman 4 feline sarcoma viral oncogene homolog
A_33_P3741022	0.000270622	0.0298991	-4.44693	-2.15281	4.44693	down	2.88622	15.2443	5.30901	26.0728	4.89414	19.3245	-1.28177	0.807378	-0.807378	1.40418	-1.03793	1.11978	LINC00511	Homo sapiens long intergenic non-protein coding RNA 511 (LINC00511), long non-coding RNA [NR_033876]	CAAAATTAAGAATAAAAATAATGTGCATCAGCAGGTGCAGATTCTGATGCTCGGTGGACA	ENST00000581549	400619	NR_033876	long intergenic non-protein coding RNA 511
A_24_P406132	0.000360574	0.030042	-5.02743	-2.32982	5.02743	down	18.9148	113.907	21.9099	124.146	23.7531	103.02	-1.05185	1.22655	-1.24465	1.17326	-1.24129	1.05185	MAPK13	Homo sapiens mitogen-activated protein kinase 13 (MAPK13), transcript variant 1, mRNA [NM_002754]	GGTTGGGAGAAACTAGCTCTGATCCTAACAGGCCACGTTAAACTGCCCATCTGGAGAATC	ENST00000211287	5603	NM_002754	mitogen-activated protein kinase 13
A_19_P00320715	0.00375319	0.0404818	-8.78379	-3.13484	8.78379	down	7.63857	80.5751	6.44572	76.7736	11.4051	71.6507	-1.45009	1.63701	-2.09991	1.38981	-1.38981	1.4379	LINC00882	long intergenic non-protein coding RNA 882 [Source:HGNC Symbol;Acc:HGNC:48568] [ENST00000479612]	CTAGGATGCCAGACAGAAATACCAGTTGCAATGTTTTGTTGCATAAAGTTTATCCTAATT	ENST00000479612	100302640		long intergenic non-protein coding RNA 882
A_19_P00321316	0.00317093	0.038692	-5.83369	-2.54441	5.83369	down	10.3234	73.9455	17.5789	92.0365	18.8444	116.188	-1.44587	1.08281	-1.08281	1.22108	-1.09569	1.70497	LINC00882	long intergenic non-protein coding RNA 882 [Source:HGNC Symbol;Acc:HGNC:48568] [ENST00000479612]	TCATCGTCTAGGATGCCAGACAGAAATACCAGTTGCAATGTTTTGTTGCATAAAGTTTAT	ENST00000479612	100302640		long intergenic non-protein coding RNA 882
A_23_P26629	0.00252549	0.0369643	-6.15855	-2.62259	6.15855	down	946.813	7402.62	1056.76	7985.98	1487.44	6848.61	-1.32334	1.33168	-1.56971	1.26364	-1.1897	1.1897	PYCARD	Homo sapiens PYD and CARD domain containing (PYCARD), transcript variant 1, mRNA [NM_013258]	CCCAAGCAAGATGCGGAAGCTCTTCAGTTTCACACCAGCCTGGAACTGGACCTGCAAGGA	ENST00000350605	29108	NM_013258	PYD and CARD domain containing
A_23_P61050	0.00215334	0.0360957	-5.1199	-2.35611	5.1199	down	104.901	699.476	143.247	860.034	163.741	639.324	-1.19513	1.23026	-1.15052	1.3509	-1.07077	1.07077	MLKL	Homo sapiens mixed lineage kinase domain-like (MLKL), transcript variant 1, mRNA [NM_152649]	GAAGTGACTGTATGCCAGTTCCAAGCCTAGGTTTCAAGAGGCCTTATAAATGTCTGTTGG	ENST00000308807	197259	NM_152649	mixed lineage kinase domain-like
A_23_P74609	0.000451079	0.0311082	-4.4855	-2.16527	4.4855	down	2961.53	17446.5	4049.51	19212.1	4632.36	17421	-1.16782	1.07884	-1.12128	1.04045	-1.04045	1.04697	G0S2	Homo sapiens G0/G1 switch 2 (G0S2), mRNA [NM_015714]	CCAACACTGTGTGAATTATCTAAATGCGTCTACCATTTTGCACTAGGGAGGAAGGATAAA	ENST00000367029	50486	NM_015714	G0/G1 switch 2
A_23_P151166	0.000182615	0.0298991	-4.30149	-2.10484	4.30149	down	35.6361	191.738	46.7467	219.629	51.4873	188.8	-1.03834	1.07753	-1.05168	1.09598	-1.02549	1.02549	HVCN1	Homo sapiens hydrogen voltage gated channel 1 (HVCN1), transcript variant 1, mRNA [NM_001040107]	TCTAGAAAAGTCTCTTATTTTCAAGCTGTTCTAAATAGCTTCGTCTCAGTTTCCCCAAAA	ENST00000356742	84329	NM_001040107	hydrogen voltage gated channel 1
A_33_P3368014	0.00344885	0.0397456	-4.15618	-2.05526	4.15618	down	29.3353	178.633	40.5224	168.066	42.5318	140.814	-0.991335	1.3031	-0.930119	1.03765	-0.973464	0.930119	HVCN1	Homo sapiens hydrogen voltage gated channel 1 (HVCN1), transcript variant 1, mRNA [NM_001040107]	ACAGATGAATGTACAATTGGCCGCCAAGATTCAACACCTTGAGTTCAGCTGCTCTGAGAA	ENST00000356742	84329	NM_001040107	hydrogen voltage gated channel 1
A_24_P365515	0.000675897	0.0319891	-8.26462	-3.04695	8.26462	down	84.4357	938.124	101.414	911.718	121.745	801.353	-1.45739	1.7046	-1.59793	1.48593	-1.4475	1.4475	FOXA2	Homo sapiens forkhead box A2 (FOXA2), transcript variant 1, mRNA [NM_021784]	TCCGGTTTCCACTACTGTGTAGACTCCTGCTTCTTCAAGCACCTGCAGATTCTGATTTTT	ENST00000419308	3170	NM_021784	forkhead box A2
A_23_P137381	0.00059343	0.0319891	-4.57459	-2.19364	4.57459	down	902.919	5006.35	934.047	4872.15	1246.98	4807.25	-0.971277	1.18795	-1.32724	0.971277	-1.02354	1.09964	ID3	Homo sapiens inhibitor of DNA binding 3, dominant negative helix-loop-helix protein (ID3), mRNA [NM_002167]	AGCCAGGTGGAAATCCTACAGCGCGTCATCGACTACATTCTCGACCTGCAGGTAGTCCTG	ENST00000486541	3399	NM_002167	inhibitor of DNA binding 3, dominant negative helix-loop-helix protein
A_32_P217140	0.00340078	0.039672	-6.01502	-2.58857	6.01502	down	21.1888	159.247	31.6643	167.857	28.2302	179.595	-1.33561	1.26242	-1.16092	1.16092	-1.4397	1.40614	ISX	intestine-specific homeobox [Source:HGNC Symbol;Acc:HGNC:28084] [ENST00000404699]	GCAGGTACCCATTTTAGGACCCTACACTCAAATGTGCAAAATAAAATTTCTATCATTTTG	ENST00000404699	91464	AK025181	intestine-specific homeobox
A_32_P161762	0.00124324	0.0332206	-9.82415	-3.29633	9.82415	down	8.63841	106.872	10.4243	123.896	13.5755	101.953	-1.67675	1.64036	-1.81051	1.67613	-1.54262	1.54262	RUNX2	Homo sapiens runt-related transcription factor 2 (RUNX2), transcript variant 1, mRNA [NM_001024630]	GCCCAGAATCCAGGTTAATACATGGAAACACGAAGCATTAGCAAAAGTAATAATTATACC	ENST00000371438	860	NM_001024630	runt-related transcription factor 2
A_32_P23125	0.00394912	0.0409398	-40.9064	-5.35425	40.9064	down	4.36624	190.26	2.69054	184.74	5.5206	147.096	-2.3663	2.76727	-3.46966	2.54732	-2.5459	2.3663	LINC00261	Homo sapiens long intergenic non-protein coding RNA 261 (LINC00261), long non-coding RNA [NR_001558]	CATTGTCCAGTAGAGCTGTTAGTTTTAACACCAGTGAGTATTACCTTTGGTTAAAAGGAT	ENST00000564492	140828	NR_001558	long intergenic non-protein coding RNA 261
A_23_P107336	0.00756694	0.0497107	-5.40639	-2.43467	5.40639	down	9.25778	82.9798	17.7628	92.7007	15.8378	62.3133	-1.47222	1.37994	-0.936964	1.36229	-1.21562	0.936964	ACAP1	Homo sapiens ArfGAP with coiled-coil, ankyrin repeat and PH domains 1 (ACAP1), mRNA [NM_014716]	GTTCACTTCTCCAAAGTCCGGTCTCTGACCCTTGACTCATGGGAGCCAGAACTAGTGAAG	ENST00000576594	9744	NM_014716	ArfGAP with coiled-coil, ankyrin repeat and PH domains 1
A_23_P142075	0.00625418	0.0468851	-6.30177	-2.65576	6.30177	down	228.253	1545.44	271.175	1562.44	211.541	1580.49	-1.14288	1.30457	-1.29915	1.14288	-1.77061	1.30717	ACP5	Homo sapiens acid phosphatase 5, tartrate resistant (ACP5), transcript variant 4, mRNA [NM_001611]	TTTGCTGAGTTCCGGGGTGCAATGGGGGAGGGAGGGAGGGAAAGCTTCCTCCTAAATCAA	ENST00000592828	54	NM_001611	acid phosphatase 5, tartrate resistant
A_23_P317756	0.000112385	0.0298991	-7.70607	-2.946	7.70607	down	1867.37	18422.9	2281.78	18846.8	2445.98	15997.9	-1.37859	1.61197	-1.4943	1.46732	-1.50722	1.37859	ACSM3	Homo sapiens acyl-CoA synthetase medium-chain family member 3 (ACSM3), transcript variant 2, mRNA [NM_202000]	CAAGTACCCCATCACAGTCTTCTGTTCAGCACCAACTGTATACCGAATGCTTGTACAGAA	ENST00000440284	6296	NM_202000	acyl-CoA synthetase medium-chain family member 3
A_24_P945113	0.00170242	0.0341785	-7.4821	-2.90344	7.4821	down	41.3438	453.32	63.7946	461.836	56.7301	348.65	-1.47766	1.66527	-1.25676	1.51464	-1.53925	1.25676	ACVRL1	Homo sapiens activin A receptor type II-like 1 (ACVRL1), transcript variant 1, mRNA [NM_000020]	GGTGTTCCAGGGTCGAAATTACACTTCTCGTACCTGGAGACGCTGTTTGTGGGAGCACTG	ENST00000550683	94	NM_000020	activin A receptor type II-like 1
A_23_P360754	0.00683111	0.0479972	-9.60809	-3.26425	9.60809	down	34.2335	441.568	60.8228	433.338	50.2723	565.113	-1.79851	1.57879	-1.37417	1.37417	-1.76219	1.90493	ADAMTS4	Homo sapiens ADAM metallopeptidase with thrombospondin type 1 motif, 4 (ADAMTS4), mRNA [NM_005099]	AAATTGAATTCTACTATTTATGTGATCCTTTTGGAGTCAGACAGATGTGGTTGCATCCTA	ENST00000367996	9507	NM_005099	ADAM metallopeptidase with thrombospondin type 1 motif, 4
A_33_P3413905	0.00266829	0.0375469	-4.27894	-2.09725	4.27894	down	262.374	1317.81	290.147	1527.82	392.342	1353.6	-1.03952	0.977066	-1.29923	1.01292	-0.977066	0.985966	ADM2	Homo sapiens adrenomedullin 2 (ADM2), transcript variant 1, mRNA [NM_024866]	GAACTCGGAGGTGAGCTCCTCTCACCACTCTCTTGAATAAAGCTTTTCTCACCATTTTAA	ENST00000395738	79924	NM_024866	adrenomedullin 2
A_23_P156826	0.00306723	0.0383411	-5.76353	-2.52695	5.76353	down	238.865	1550.98	267.7	1483.97	277.768	1720.75	-1.07293	1.31412	-1.31338	1.07293	-1.37328	1.43422	ADTRP	Homo sapiens androgen-dependent TFPI-regulating protein (ADTRP), transcript variant 2, mRNA [NM_032744]	AGACAATGGGAAAGTAAGTTATAAAAAATACTGGGAAATCTGTTTCTCTTCTGAGCAAGC	ENST00000514824	84830	NM_032744	androgen-dependent TFPI-regulating protein
A_23_P214627	0.000391909	0.030042	-4.41779	-2.14332	4.41779	down	972.614	5038.22	1061.69	5182.2	1131.82	4495.12	-0.933398	1.12771	-1.21184	0.990892	-1.23272	0.933398	AIF1	Homo sapiens allograft inflammatory factor 1 (AIF1), transcript variant 2, mRNA [NM_004847]	CTGATTTGAAGGGAAAAGGGATGATGGGATTGAAGGGGCTTCTAATGACCCAGATATGGA	ENST00000459762	199	NM_004847	allograft inflammatory factor 1
A_24_P912439	0.00625053	0.0468703	-18.419	-4.20312	18.419	down	5.70644	87.6757	2.4545	71.8033	3.56923	57.7933	-1.49931	2.13034	-3.12134	1.66474	-2.69432	1.49931	AKNA	AT-hook transcription factor [Source:HGNC Symbol;Acc:HGNC:24108] [ENST00000312033]	CACAGGGATGATCACTGTCAGAGTGAATAAGACAGCGCTTCACAGTTTAGACATGGCTTA	ENST00000312033	80709	AB075848	AT-hook transcription factor
A_23_P83098	0.000799573	0.0322856	-5.56362	-2.47602	5.56362	down	601.953	4579.58	773.012	4313.79	889.511	4202.32	-1.19861	1.41702	-1.24264	1.15329	-1.15329	1.26323	ALDH1A1	Homo sapiens aldehyde dehydrogenase 1 family, member A1 (ALDH1A1), mRNA [NM_000689]	GGAGAGTACGGTTTCCATGAATATACAGAGGTCAAAACAGTCACAGTGAAAATCTCTCAG	ENST00000297785	216	NM_000689	aldehyde dehydrogenase 1 family, member A1
A_23_P104464	0.000618205	0.0319891	-5.4593	-2.44872	5.4593	down	253	1760.15	325.226	1733.25	348.365	1780.51	-1.14347	1.34316	-1.18603	1.14347	-1.20004	1.32999	ALOX5	Homo sapiens arachidonate 5-lipoxygenase (ALOX5), transcript variant 1, mRNA [NM_000698]	GATGTCTATTCTTGTTGGAGACATGGGATGATTATTTTCTGTTCTATTTGTGCTTAGTCC	ENST00000610656	240	NM_000698	arachidonate 5-lipoxygenase
A_23_P350698	0.00619211	0.0468014	-7.73136	-2.95072	7.73136	down	12.7839	112.27	24.523	160.532	11.5686	108.309	-1.63803	1.18468	-1.10309	1.5231	-2.30018	1.10309	ANKFN1	Homo sapiens ankyrin-repeat and fibronectin type III domain containing 1 (ANKFN1), mRNA [NM_153228]	CAAAAGCTTTCTGGCTCTGAATCTATGGAAAGTGTGGATCATACTTCTGACTGCCCCATG	ENST00000318698	162282	NM_153228	ankyrin-repeat and fibronectin type III domain containing 1
A_23_P258483	0.001823	0.0346047	-13.0421	-3.70511	13.0421	down	9.46742	170.437	12.8457	198.969	19.8401	183.836	-2.2038	1.65446	-2.16843	1.70029	-1.65446	1.73388	ANKRD55	Homo sapiens ankyrin repeat domain 55 (ANKRD55), mRNA [NM_024669]	ACTCCCTAAATAAGCACTTAGAATATTTGGGTGTGCATATTAAGTCTGTGAATTTCTGTG	ENST00000434982	79722	NM_024669	ankyrin repeat domain 55
A_24_P345846	0.0037102	0.0404245	-4.41416	-2.14214	4.41416	down	74.3973	419.248	84.9569	335.723	81.611	367.114	-0.842307	1.34031	-1.05569	0.842307	-1.22683	1.11898	ANTXR2	Homo sapiens anthrax toxin receptor 2 (ANTXR2), transcript variant 1, mRNA [NM_058172]	TGAAACATATACAACGAGTGTAAAACCAGTAAGTGTACAGCTTAATTCTATGCTTTGTCC	ENST00000307333	118429	NM_058172	anthrax toxin receptor 2
A_24_P377144	0.00023917	0.0298991	-4.29817	-2.10372	4.29817	down	241.83	1299.43	237.326	1036.96	282.096	1111.2	-0.805478	1.30847	-1.23747	0.805478	-1.10132	1.05295	ANTXR2	Homo sapiens anthrax toxin receptor 2 (ANTXR2), transcript variant 1, mRNA [NM_058172]	AGAAAGCCAAAAATGCTGTGGTGAAGATTCCTGAAGAAACAGAGGAACCCATCAGGCCTA	ENST00000307333	118429	NM_058172	anthrax toxin receptor 2
A_23_P121716	0.0006585	0.0319891	-11.1816	-3.48306	11.1816	down	203.969	2683.46	256.513	2835.42	248.241	2779.41	-1.6539	1.75191	-1.72809	1.6539	-1.88854	1.77283	ANXA3	Homo sapiens annexin A3 (ANXA3), mRNA [NM_005139]	TGGACATTCGAACAGAGTTCAAGAAGCATTATGGCTATTCCCTATATTCAGCAATTAAAT	ENST00000505805	306	NM_005139	annexin A3
A_33_P3223592	0.00119181	0.032811	-6.18875	-2.62965	6.18875	down	13999.8	96126.1	16105.7	117453	19709.7	108665	-1.23383	1.23383	-1.43653	1.34544	-1.25837	1.38095	APOE	Homo sapiens apolipoprotein E (APOE), transcript variant 1, mRNA [NM_001302688]	CGCCCCAGCCGTCCTCCTGGGGTGGACCCTAGTTTAATAAAGATTCACCAAGTTTCACGC	ENST00000252486	348	NM_001302688	apolipoprotein E
A_23_P167389	0.000591989	0.0319891	-5.03722	-2.33263	5.03722	down	564.786	3558.28	588.412	3350.62	805.564	3342.53	-1.03966	1.30388	-1.3854	1.03966	-1.0454	1.18388	ARAP3	Homo sapiens ArfGAP with RhoGAP domain, ankyrin repeat and PH domain 3 (ARAP3), mRNA [NM_022481]	ATATTTGATACGTAGGGGTTCCATGAGAGATTTTGGGTTTTAAAGGAATGGTTTTACTGC	ENST00000512390	64411	NM_022481	ArfGAP with RhoGAP domain, ankyrin repeat and PH domain 3
A_23_P128728	0.00032459	0.0298991	-4.70811	-2.23515	4.70811	down	1615.62	9741	2320.67	10957.1	1967.6	8401.09	-1.07722	1.20289	-0.959639	1.19514	-1.31091	0.959639	ARG2	Homo sapiens arginase 2 (ARG2), mRNA [NM_001172]	TTTGGTCAGACAAGAGAAGGAGGGCATATTGTCTATGACCAACTTCCTACTCCCAGTTCA	ENST00000261783	384	NM_001172	arginase 2
A_23_P64661	0.00216324	0.0360957	-6.57174	-2.71628	6.57174	down	76.7039	712.984	103.919	750.789	136.564	672.193	-1.55203	1.35261	-1.51881	1.24968	-1.23786	1.23786	ARHGAP9	Homo sapiens Rho GTPase activating protein 9 (ARHGAP9), transcript variant 1, mRNA [NM_032496]	CCCTTTAAATCTCCCAAATGACTGTCTCTATCTTCATGAGTGTGACTTGAGGTGTTGGGA	ENST00000430041	64333	NM_032496	Rho GTPase activating protein 9
A_23_P151075	0.00126485	0.0332206	-6.79435	-2.76434	6.79435	down	1129.78	10650	1378.79	10059.7	1898.86	10085.4	-1.44811	1.47678	-1.5656	1.21704	-1.21704	1.36843	ARHGDIB	Homo sapiens Rho GDP dissociation inhibitor (GDI) beta (ARHGDIB), mRNA [NM_001175]	TCAGGTTCCAGTAGTTCATTCTAATGCCTAGATTCTTTTGTGGTTGTTGCTGGCCCAATG	ENST00000228945	397	NM_001175	Rho GDP dissociation inhibitor (GDI) beta
A_33_P3234580	0.000489414	0.0312935	-7.3193	-2.87171	7.3193	down	301.247	2507.46	353.458	2889.63	453.868	3045.97	-1.40932	1.33603	-1.58359	1.36321	-1.33603	1.58694	ASS1	Homo sapiens argininosuccinate synthase 1 (ASS1), transcript variant 1, mRNA [NM_000050]	GCAGCTGCGGTGGGGAGCTATAAAAATGACAATTAAAAGAGACACTAGTCTTTTATTTCT	ENST00000372394	445	NM_000050	argininosuccinate synthase 1
A_23_P31921	0.00144527	0.033597	-7.30992	-2.86986	7.30992	down	39.7897	382.982	68.7495	458.515	60.9782	432.139	-1.66952	1.28543	-1.28543	1.36765	-1.57165	1.42989	ASS1	Homo sapiens argininosuccinate synthase 1 (ASS1), transcript variant 1, mRNA [NM_000050]	TCCCTGGAGGATGCCTGAATTCTACAACCGGTTCAAGGGCCGCAATGACCTGATGGAGTA	ENST00000422569	445	NM_000050	argininosuccinate synthase 1
A_23_P207632	8.04692e-06	0.0191275	-4.02664	-2.00958	4.02664	down	577.133	2862.08	715.747	3065.95	813.601	2912.28	-0.960011	1.03821	-1.05433	0.960011	-0.982628	1.03354	ATP2A3	Homo sapiens ATPase, Ca++ transporting, ubiquitous (ATP2A3), transcript variant 5, mRNA [NM_174953]	CTCTGATGGACAGAATTTTTCTCTTAACTCAGCTTTTGCTACTTTGGCAAAAACTAGCGA	ENST00000397041	489	NM_174953	ATPase, Ca++ transporting, ubiquitous
A_23_P152002	0.00579836	0.0456963	-7.67248	-2.93969	7.67248	down	9.41121	75.8175	6.91139	76.7648	12.5322	73.6746	-1.26933	1.42889	-2.1196	1.26933	-1.37418	1.35776	BCL2A1	Homo sapiens BCL2-related protein A1 (BCL2A1), transcript variant 1, mRNA [NM_004049]	TGTAACCATATTTGCATTTGAAGGTATTCTCATCAAGAAACTTCTACGACAGCAAATTGC	ENST00000267953	597	NM_004049	BCL2-related protein A1
A_33_P3322999	0.00433894	0.0418078	-8.82626	-3.1418	8.82626	down	2.37823	32.0243	2.64228	26.5409	3.7125	21.9805	-1.49556	1.94379	-1.74852	1.49537	-1.37109	1.37109	C10orf105	Homo sapiens chromosome 10 open reading frame 105 (C10orf105), transcript variant 1, mRNA [NM_001164375]	CCAGAGACACCAGATCTTCTGATTTCTCATGAGAAATTGAACATCTGAGCTTTTAAATAA	ENST00000398786	414152	NM_001164375	chromosome 10 open reading frame 105
A_33_P3341916	0.000234505	0.0298991	-7.0122	-2.80987	7.0122	down	8.1941	74.7432	9.53627	67.0791	13.3799	83.7414	-1.36662	1.5108	-1.55265	1.17725	-1.17725	1.64504	C10orf128	Homo sapiens chromosome 10 open reading frame 128 (C10orf128), transcript variant 5, mRNA [NM_001288743]	CCCAAAATATGCCTATTAACCTCGAGGAATGACTTCTCTTTTTGTCATCAAAGTGGATGA	ENST00000453436	170371	NM_001288743	chromosome 10 open reading frame 128
A_23_P101407	0.00103439	0.0322856	-4.53066	-2.17972	4.53066	down	318.77	1973.68	394.752	1784.53	451.194	1746.04	-0.99781	1.32063	-1.09424	0.99781	-1.01461	1.11406	C3	Homo sapiens complement component 3 (C3), mRNA [NM_000064]	GTGCCGCTGTGCTGAGGAGAATTGCTTCATACAAAAGTCGGATGACAAGGTCACCCTGGA	ENST00000599899	718	NM_000064	complement component 3
A_23_P42282	0.00108389	0.0322887	-4.18934	-2.06672	4.18934	down	165.131	911.072	230.025	1057.22	232.861	786.364	-0.991635	1.16045	-0.918324	1.19762	-1.01381	0.918324	C4B	Homo sapiens complement component 4B (Chido blood group) (C4B), mRNA [NM_001002029]	GCTTTCCGCCTCTTTGAGACCAAGATCACCCAAGTCCTGCACTTCACCAAGGATGTCAAG	ENST00000463249	721	NM_001002029	complement component 4B (Chido blood group)
A_24_P330518	0.000322099	0.0298991	-13.5777	-3.76317	13.5777	down	2.81802	44.4638	2.53617	39.9723	3.35894	39.3767	-1.66846	1.99956	-2.22535	1.66846	-1.93317	1.79451	CA12	Homo sapiens carbonic anhydrase XII (CA12), transcript variant 1, mRNA [NM_001218]	CTGTCAAAAGACTCTGTATATCTTTTGTGGATGAGTTTTGTGAGAGAACAGAGAGACCAT	ENST00000178638	771	NM_001218	carbonic anhydrase XII
A_24_P945096	0.00400592	0.0410416	-4.02321	-2.00835	4.02321	down	16.6381	75.553	31.9522	125.638	27.3665	116.244	-1.20385	0.667287	-0.667287	1.22353	-1.00396	1.25912	CACNA1I	Homo sapiens calcium channel, voltage-dependent, T type, alpha 1I subunit (CACNA1I), transcript variant 1, mRNA [NM_021096]	CTTAGAAGCTGCTCTTTAGCCCAGATACACATACTCTTTTTTGTCTTTGTGCAATAATCA	ENST00000404898	8911	NM_021096	calcium channel, voltage-dependent, T type, alpha 1I subunit
A_33_P3305758	1.21269e-05	0.0234208	-4.52876	-2.17912	4.52876	down	568.521	3173.29	621.467	2974.84	766.5	3103.45	-0.949096	1.21974	-1.2255	0.949096	-1.03606	1.15787	CAPG	Homo sapiens capping protein (actin filament), gelsolin-like (CAPG), transcript variant 3, mRNA [NM_001256140]	AGAAACTCTACCAGGTGAAGGGGAAGAAGAACATCCGTGCCACCGAGCGGGCACTGAACT	ENST00000415012	822	NM_001256140	capping protein (actin filament), gelsolin-like
A_33_P3389634	0.00713429	0.048548	-4.16596	-2.05865	4.16596	down	2267.42	12041.4	2418.7	12988.3	3699.36	10923.5	-1.05744	1.03957	-1.36912	0.971313	-0.86925	0.86925	CAPG	Homo sapiens capping protein (actin filament), gelsolin-like (CAPG), transcript variant 1, mRNA [NM_001747]	ATTCTGCCTCAGGGCCATGAGAGTCCCATCTTCAAGCAATTTTTCAAGGACTGGAAATGA	ENST00000409724	822	NM_001747	capping protein (actin filament), gelsolin-like
A_33_P3393170	0.00420111	0.0413578	-4.7821	-2.25764	4.7821	down	46.7787	340.21	74.2529	336.354	91.0274	351.923	-1.39957	1.15107	-1.13784	0.957154	-0.957154	1.17015	CAPN5	Homo sapiens calpain 5 (CAPN5), mRNA [NM_004055]	CCACCACAGGGTTAGGGGACAGGAAGCCTGTTCTATTCTCAATAAATCTTACAAAATTCC	ENST00000278559	726	NM_004055	calpain 5
A_23_P52676	5.40366e-05	0.0285211	-5.14846	-2.36414	5.14846	down	49.4696	322.197	65.5879	359.265	58.3595	259.998	-1.02714	1.36432	-1.02512	1.34396	-1.30675	1.02512	CATSPER1	Homo sapiens cation channel, sperm associated 1 (CATSPER1), mRNA [NM_053054]	CCAGGCAGCCGTCATCGATGAGATTGTGGACACCACATTTGAGGCTGGAGAAGAGGACTT	ENST00000529244	117144	NM_053054	cation channel, sperm associated 1
A_24_P75917	0.0076683	0.049844	-4.00237	-2.00086	4.00237	down	61.8288	244.039	40.4469	206.764	69.8243	258.407	-0.626148	1.04275	-1.64326	0.626148	-0.968731	1.09553	CCDC144A	Homo sapiens coiled-coil domain containing 144A (CCDC144A), transcript variant 1, mRNA [NM_014695]	AATTACAGCAAGACATGCAAAAGTTTAAGAATGAGGTCAACACATTAGAAGAAGAGTTCC	ENST00000507171	9720	NM_014695	coiled-coil domain containing 144A
A_23_P58082	0.00209926	0.0360078	-5.50145	-2.45981	5.50145	down	12.1683	76.48	18.2217	98.7678	14.4035	81.9896	-1.25888	1.08121	-1.08121	1.2727	-1.53362	1.15181	CCDC80	Homo sapiens coiled-coil domain containing 80 (CCDC80), transcript variant 1, mRNA [NM_199511]	CGGAGTACTTCTCCATGCTTCTAGTCGGAAAAGACGGAAATGTCAAATCCTGGTATCCTT	ENST00000439685	151887	NM_199511	coiled-coil domain containing 80
A_23_P152838	0.00688546	0.0481306	-5.66527	-2.50214	5.66527	down	15.6419	146.79	29.049	153.882	31.0845	132.417	-1.61409	1.30431	-1.12589	1.19491	-1.14135	1.12589	CCL5	Homo sapiens chemokine (C-C motif) ligand 5 (CCL5), transcript variant 1, mRNA [NM_002985]	AGATGAGCTAGGATGGAGAGTCCTTGAACCTGAACTTACACAAATTTGCCTGTTTCTGCT	ENST00000618639	6352	NM_002985	chemokine (C-C motif) ligand 5
A_33_P3369844	0.000302027	0.0298991	-24.5246	-4.61616	24.5246	down	596.67	16253.8	541.775	14956.8	727.367	16615.9	-2.07919	2.37664	-2.6233	2.07919	-2.31148	2.37867	CD24	Homo sapiens CD24 molecule (CD24), transcript variant 1, mRNA [NM_013230]	CTACATGGGAACAAACAGATCGAACAGTTTTGAAGCTACTGTGTGTGTGAATGAACACTC	ENST00000606017	100133941	NM_013230	CD24 molecule
A_24_P159434	0.00101425	0.0322856	-35.1076	-5.13371	35.1076	down	4.04402	214.013	5.20857	194.736	11.2776	287.256	-3.03091	2.38299	-3.07068	2.06934	-2.06934	2.77787	CD300A	Homo sapiens CD300a molecule (CD300A), transcript variant 1, mRNA [NM_007261]	AGTTTCTCTGGACTCTTAGGTTTATTTTTAATATGAAATATAAAAACAGTTTCAAATATC	ENST00000392625	11314	NM_007261	CD300a molecule
A_23_P331748	0.000229636	0.0298991	-4.86561	-2.28262	4.86561	down	1863.08	10764.2	2158.92	11568.9	2495.47	10813.3	-1.07258	1.14604	-1.26482	1.07258	-1.16899	1.12285	CD33	Homo sapiens CD33 molecule (CD33), transcript variant 1, mRNA [NM_001772]	GGGACCAAAGGCTGATTCTTGGAGATTTAACTCCCCACAGGCAATGGGTTTATAGACATT	ENST00000421133	945	NM_001772	CD33 molecule
A_33_P3375541	0.00015988	0.0298991	-8.99613	-3.1693	8.99613	down	1220.13	13680.4	1605.67	14568.7	1395.71	11633.5	-1.45577	1.71937	-1.4645	1.63265	-1.77985	1.45577	CD3D	Homo sapiens CD3d molecule, delta (CD3-TCR complex) (CD3D), transcript variant 1, mRNA [NM_000732]	GCTTCTAGAAGCAGCCATTACCAACTGTACCTTCCCTTCTTGCTCAGCCAATAAATATAT	ENST00000300692	915	NM_000732	CD3d molecule, delta (CD3-TCR complex)
A_23_P74547	0.000283246	0.0298991	-6.33515	-2.66338	6.33515	down	846.854	6986.71	1185.7	8046.66	1268.12	6707.03	-1.36227	1.37029	-1.28159	1.3966	-1.2978	1.28159	CD53	Homo sapiens CD53 molecule (CD53), transcript variant 1, mRNA [NM_001040033]	ACCATAGGGCTATGATCTGCAGTAGTTCTGTGGTGAAGAGACTTGTTTCATCTCCGGAAA	ENST00000464329	963	NM_001040033	CD53 molecule
A_33_P3241269	0.000323981	0.0298991	-9.0304	-3.17479	9.0304	down	43.2777	496.938	55.9633	495.927	58.0567	489.355	-1.51455	1.69496	-1.54856	1.51455	-1.60874	1.64301	CES1	Homo sapiens carboxylesterase 1 (CES1), transcript variant 1, mRNA [NM_001025195]	AGGAGCAAGTTTTGTATTTGTGACCTCAGCTTTGGGAATAAAGGATCTTTTGAAGGCCAA	ENST00000421606	1066	NM_001025195	carboxylesterase 1
A_23_P7212	0.00033033	0.0298991	-21.1536	-4.40283	21.1536	down	8.84237	214.441	10.6244	231.879	10.5671	220.096	-2.11173	2.17641	-2.25172	2.11173	-2.37269	2.1842	CFI	Homo sapiens complement factor I (CFI), mRNA [NM_000204]	ACCAAAGTGGCCAATTATTTTGACTGGATTAGCTACCATGTAGGAAGGCCTTTTATTTCT	ENST00000512148	3426	NM_000204	complement factor I
A_23_P215479	0.000184071	0.0298991	-5.87573	-2.55477	5.87573	down	77.514	579.968	103.364	658.621	124.526	617.104	-1.37873	1.21285	-1.36839	1.21885	-1.21285	1.27263	CLIP2	Homo sapiens CAP-GLY domain containing linker protein 2 (CLIP2), transcript variant 1, mRNA [NM_003388]	GCTCTTTCTAGCAAAATCAGGCAGCTCTGCCCCATCGGTAGGGGCACCGATTAGTCTACT	ENST00000361545	7461	NM_003388	CAP-GLY domain containing linker protein 2
A_33_P3392391	0.0006012	0.0319891	-8.33456	-3.05911	8.33456	down	51.0869	505.479	62.6754	522.088	61.0372	499.35	-1.43197	1.5628	-1.54189	1.43197	-1.69327	1.51544	CPT1C	Homo sapiens carnitine palmitoyltransferase 1C (CPT1C), transcript variant 3, mRNA [NM_001199752]	ATCCCTGTTCAGCAAATGCATCTGTTTGACGTCCACAATTACCCGGACTATGTTTCCTCA	ENST00000598259	126129	NM_001199752	carnitine palmitoyltransferase 1C
A_33_P3290040	0.00222576	0.0361219	-8.27523	-3.0488	8.27523	down	111.513	1139.58	159.755	1182.19	122.455	1068.73	-1.51531	1.52605	-1.40153	1.40153	-1.89831	1.40367	CPT1C	Homo sapiens carnitine palmitoyltransferase 1C (CPT1C), transcript variant 3, mRNA [NM_001199752]	TTCCAGCAGGCAGCTGGCCTCTCCAAGGAATAAGGGTGAAATTGCCACAGCTGGCTGACA	ENST00000598293	126129	NM_001199752	carnitine palmitoyltransferase 1C
A_23_P134347	0.000299845	0.0298991	-8.36274	-3.06398	8.36274	down	32.0843	350.747	46.4493	383.575	48.7764	368.033	-1.60958	1.52905	-1.48066	1.48066	-1.5233	1.56869	CPVL	Homo sapiens carboxypeptidase, vitellogenic-like (CPVL), transcript variant 2, mRNA [NM_019029]	ATAAACTACTAGATGGCGACTTAACAAGTGATCCTTCTTACTTCCAGAATGTTACAGGAT	ENST00000612187	54504	NM_019029	carboxypeptidase, vitellogenic-like
A_23_P58251	0.000213819	0.0298991	-16.7963	-4.07007	16.7963	down	44.3458	899.557	54.6737	1055.96	62.3632	878.47	-1.98325	2.04723	-2.08607	2.10103	-2.00939	1.98325	CPZ	Homo sapiens carboxypeptidase Z (CPZ), transcript variant 3, mRNA [NM_001014448]	TGGCAGCACAACAAGGAGTCACTCCTGAATTTCGTGGAGACGGTGCACCGGGGCATCAAA	ENST00000514302	8532	NM_001014448	carboxypeptidase Z
A_23_P41114	0.0039255	0.0408302	-23.6545	-4.56404	23.6545	down	7.10023	292.994	10.9341	276.409	20.5766	304.061	-2.90524	2.14976	-2.68721	1.88821	-1.88821	2.17348	CSTA	Homo sapiens cystatin A (stefin A) (CSTA), mRNA [NM_005213]	AAACAAATGAGACTTATGGAAAATTGGAAGCTGTGCAGTATAAAACTCAAGTTGTTGCTG	ENST00000264474	1475	NM_005213	cystatin A (stefin A)
A_24_P242646	0.00213422	0.036029	-10.3881	-3.37686	10.3881	down	2.51268	27.1146	2.34012	25.3224	4.24976	47.516	-1.54195	1.57796	-2.04946	1.30183	-1.30183	2.35754	CTSS	Homo sapiens cathepsin S (CTSS), transcript variant 1, mRNA [NM_004079]	GTTTTTAACATAATTTTTGTTTTATCCACAACTTTTCAAGTATTGAAAGTAGAATAAAAA	ENST00000607427	1520	NM_004079	cathepsin S
A_23_P7144	0.00501352	0.0436264	-8.5645	-3.09837	8.5645	down	54.7021	578.267	86.5821	605.323	64.4627	638.164	-1.61815	1.47205	-1.36055	1.36055	-1.89932	1.58448	CXCL1	Homo sapiens chemokine (C-X-C motif) ligand 1 (melanoma growth stimulating activity, alpha) (CXCL1), transcript variant 1, mRNA [NM_001511]	CATACTGCCTTGTTTAATGGTAGTTTTACAGTGTTTCTGGCTTAGAACAAAGGGGCTTAA	ENST00000395761	2919	NM_001511	chemokine (C-X-C motif) ligand 1 (melanoma growth stimulating activity, alpha)
A_33_P3330264	0.00647885	0.0473357	-4.97808	-2.31559	4.97808	down	53.6725	368.83	66.5856	409.18	98.7887	336.115	-1.3336	1.13523	-1.42744	1.10754	-0.971475	0.971475	CXCL1	Homo sapiens chemokine (C-X-C motif) ligand 1 (melanoma growth stimulating activity, alpha) (CXCL1), transcript variant 1, mRNA [NM_001511]	AAGCTTGCCTCAATCCTGCATCCCCCATAGTTAAGAAAATCATCGAAAAGATGCTGAACA	ENST00000395761	2919	NM_001511	chemokine (C-X-C motif) ligand 1 (melanoma growth stimulating activity, alpha)
A_24_P183150	0.00134023	0.0332716	-4.69453	-2.23098	4.69453	down	332.559	2165.05	414.36	1991.93	505.721	1947.13	-1.08992	1.30093	-1.17752	1.00323	-1.00323	1.11812	CXCL3	Homo sapiens chemokine (C-X-C motif) ligand 3 (CXCL3), mRNA [NM_002090]	GATGTGAGTGTGTTTCATCAAACATAGCTCAGTCCTGATTATTTAATTGGAATATGATGG	ENST00000296026	2921	NM_002090	chemokine (C-X-C motif) ligand 3
A_33_P3221293	0.00151816	0.0337835	-10.6968	-3.41911	10.6968	down	50.2294	638.121	59.609	807.445	75.5672	625.965	-1.68452	1.67084	-1.84239	1.8329	-1.61333	1.61333	DFNA5	Homo sapiens deafness, autosomal dominant 5 (DFNA5), transcript variant 1, mRNA [NM_004403]	TCTGTGCTTTAGGCAGAGAACATTCATGATGTCATATGTGAACTAGAAGTACGTGTTACT	ENST00000409775	1687	NM_004403	deafness, autosomal dominant 5
A_33_P3338740	0.00147325	0.0336722	-7.49667	-2.90625	7.49667	down	45.7115	496.333	77.6703	565.182	76.6536	476.058	-1.69941	1.4294	-1.33947	1.43934	-1.47165	1.33947	DHH	Homo sapiens desert hedgehog (DHH), mRNA [NM_021044]	ACATCTGACGTTTTCCTGCAAGGTGGGCTAATAAAGGGAAGGCTTTCAGGAGCTTACTGG	ENST00000266991	50846	NM_021044	desert hedgehog
A_24_P236251	0.00245414	0.0367956	-10.5773	-3.4029	10.5773	down	1794.81	25628.5	2075.04	26965.4	2963.89	22014.1	-1.74027	1.78372	-1.93582	1.67961	-1.53464	1.53464	DLK1	Homo sapiens delta-like 1 homolog (Drosophila) (DLK1), mRNA [NM_003836]	GGTATCGTCTTCCTCAACAAGTGCGAGACCTGGGTGTCCAACCTGCGCTACAACCACATG	ENST00000331224	8788	NM_003836	delta-like 1 homolog (Drosophila)
A_33_P3217559	2.49991e-05	0.0285211	-8.13378	-3.02393	8.13378	down	274.753	2812.33	306.197	2586.9	339.588	2461.11	-1.37284	1.67085	-1.62138	1.37284	-1.58523	1.44864	DLK1	Homo sapiens delta-like 1 homolog (Drosophila) (DLK1), mRNA [NM_003836]	ATCGTGGCCAACAGCTGCACCCCCAACCCATGCGAGAACGACGGCGTCTGCACTGACATT	ENST00000331224	8788	NM_003836	delta-like 1 homolog (Drosophila)
A_23_P104188	0.00431153	0.0416997	-6.80713	-2.76705	6.80713	down	20.6429	189.455	31.3026	176.284	25.5289	181.451	-1.40031	1.48596	-1.20454	1.20454	-1.61186	1.39393	ELF3	Homo sapiens E74-like factor 3 (ets domain transcription factor, epithelial-specific ) (ELF3), transcript variant 1, mRNA [NM_004433]	AGGTTCTCCAGAGTCGGAACTGAGGGTTGGAACTATACCCGGGACCAAACTCACGGACCA	ENST00000475698	1999	NM_004433	E74-like factor 3 (ets domain transcription factor, epithelial-specific )
A_23_P410115	0.00646504	0.0473357	-19.9759	-4.32019	19.9759	down	11.8908	183.688	9.41233	231.397	9.2809	226.873	-1.81874	1.81874	-2.56083	1.97438	-2.69428	2.09361	ENTHD1	Homo sapiens ENTH domain containing 1 (ENTHD1), mRNA [NM_152512]	TGCTAGTGTTAGGAGTTAAATGGAAACAAGAAGGACATGGGGCAAATGTTTTTACTGTCA	ENST00000325157	150350	NM_152512	ENTH domain containing 1
A_23_P210210	0.00462675	0.0425763	-5.13306	-2.35982	5.13306	down	670.384	3894.85	813.771	3889.37	798.352	4528.8	-1.02357	1.20308	-1.1488	1.02357	-1.28957	1.39088	EPAS1	Homo sapiens endothelial PAS domain protein 1 (EPAS1), mRNA [NM_001430]	ACACTGAAAAATATTCCAAGCTTCATATTAACCCTACCTGTCAACGTAACGATTTCATGA	ENST00000466465	2034	NM_001430	endothelial PAS domain protein 1
A_23_P43846	0.00734054	0.0491405	-4.67713	-2.22562	4.67713	down	93.4739	628.601	172.254	655.179	117.643	548.065	-1.34356	1.09408	-0.866526	0.976355	-1.52981	0.866526	FABP6	Homo sapiens fatty acid binding protein 6, ileal (FABP6), transcript variant 1, mRNA [NM_001040442]	CAAGGAAAGCAACATACAGACAATGGGGGGCAAGACGTTCAAGGCCACTGTGCAGATGGA	ENST00000523955	2172	NM_001040442	fatty acid binding protein 6, ileal
A_24_P233786	0.00487784	0.0431962	-4.0955	-2.03404	4.0955	down	2282.98	11509.5	3102.28	11401.4	2739.49	11829.4	-0.93421	1.08776	-0.896668	0.896668	-1.18926	1.09756	FAM129A	Homo sapiens family with sequence similarity 129, member A (FAM129A), mRNA [NM_052966]	AAATCGACACTGTGGATTGACTTTCCCGGTCACTATATAAAGCAAATAAACTTAAAACAC	ENST00000367511	116496	NM_052966	family with sequence similarity 129, member A
A_32_P83811	0.00432116	0.0417156	-6.95374	-2.79779	6.95374	down	67.1898	570.79	94.5434	563.278	80.5592	623.317	-1.33303	1.44175	-1.24516	1.24516	-1.58926	1.53899	FAM47E	Homo sapiens family with sequence similarity 47, member E (FAM47E), transcript variant 2, mRNA [NM_001242936]	ACTTTATCACCCATGAGATCAATATTCACATGTAATCTTCTCATATTTTTGTGGCACGTG	ENST00000424749	100129583	NM_001242936	family with sequence similarity 47, member E
A_23_P21560	0.000160281	0.0298991	-4.54608	-2.18462	4.54608	down	464.511	2528.85	525.144	2607.42	612.27	2478.54	-0.999753	1.13308	-1.22762	0.999753	-1.11933	1.07433	FAM49A	Homo sapiens family with sequence similarity 49, member A (FAM49A), mRNA [NM_030797]	GGGCTGCTAAATGCCCTCAGGTTCACTACAAAGCACTTGAACGATGAATCAACTTCCAAA	ENST00000406434	81553	NM_030797	family with sequence similarity 49, member A
A_23_P379071	1.38881e-06	0.0103413	-4.08366	-2.02986	4.08366	down	1587.11	8046.88	1864.02	8047.06	2159.39	7824.83	-0.926362	1.1038	-1.09922	0.926362	-1.00018	1.03367	FBXL13	Homo sapiens F-box and leucine-rich repeat protein 13 (FBXL13), transcript variant 1, mRNA [NM_145032]	ATGCCATTACCTGCACATTTTGGATATCTCTGGTTGTGTCTTGCTTACTGACCAAATCCT	ENST00000455112	222235	NM_145032	F-box and leucine-rich repeat protein 13
A_33_P3344477	0.00280232	0.0378849	-4.35023	-2.12109	4.35023	down	19.2112	94.7215	21.1656	91.5496	23.389	105.156	-0.881636	1.10825	-1.14673	0.881636	-1.11578	1.22925	FERMT2	Homo sapiens fermitin family member 2 (FERMT2), transcript variant 2, mRNA [NM_001134999]	GAGAGGTGGATTACCAGTATTGTTCAATAATCCATGGTTCAAAGACTGTATAAATGCATT	ENST00000343279	10979	NM_001134999	fermitin family member 2
A_23_P15727	0.00127571	0.0332716	-4.18184	-2.06414	4.18184	down	44.7693	217.072	53.2309	228.611	54.9367	224.705	-0.931488	1.03424	-1.0866	0.931488	-1.15426	1.05434	FKBP10	Homo sapiens FK506 binding protein 10, 65 kDa (FKBP10), mRNA [NM_021939]	CAGACTGGGCTGTAGTTAGCTTTTCATCCCTAAAGAAGGCTTTCCCTAAGGAACCATAGA	ENST00000489591	60681	NM_021939	FK506 binding protein 10, 65 kDa
A_21_P0013306	0.00138007	0.0332716	-5.24028	-2.38964	5.24028	down	89.4428	627.288	118.73	583.874	109.704	533.105	-1.11054	1.38769	-1.10675	1.10675	-1.33398	1.12322	FKBP9	Homo sapiens FK506 binding protein 9, 63 kDa (FKBP9), transcript variant 2, mRNA [NM_001284341]	AACTGTGAGCGGTTAAGTCAAAGTGGGGACTTTCTCAGGTATCATTACAATGGCACGCTT	ENST00000441699	11328	NM_001284341	FK506 binding protein 9, 63 kDa
A_24_P205130	0.00174841	0.0344456	-4.6221	-2.20855	4.6221	down	92.4926	486.932	100.886	560.433	144.452	568.055	-1.1048	0.979649	-1.38435	1.005	-0.979649	1.1722	FNBP1	Homo sapiens formin binding protein 1 (FNBP1), mRNA [NM_015033]	TCATTGCAGAAGAAAGTTTACACGACGTCAAAAAGTGACGTTCATGCTAAGTGTTTTTCC	ENST00000420781	23048	NM_015033	formin binding protein 1
A_33_P3367565	0.004733	0.0428862	-4.14451	-2.0512	4.14451	down	656.872	3036.12	675.875	2717.32	690.046	3078.84	-0.779582	1.1171	-1.1433	0.779582	-1.22654	1.1075	FNBP1	PREDICTED: Homo sapiens formin binding protein 1 (FNBP1), transcript variant X1, mRNA [XM_005251815]	CATATGTCGAAGTCTGTTTGGACAAAAATGCCAAAGGTGCTAAGACTTATATTTAATACC		23048	XM_005251815	formin binding protein 1
A_33_P3247042	7.93227e-05	0.0285211	-4.21754	-2.0764	4.21754	down	139.775	745.351	191.467	861.589	197.2	718.044	-1.03423	1.06872	-0.985111	1.10033	-1.05571	0.985111	FPR3	Homo sapiens formyl peptide receptor 3 (FPR3), mRNA [NM_002030]	GGCTTTCTGGGGCTTTCTCTTTTTAAAGTCAGACTGTTGAAGGTTTCTTCTATTCTTATT	ENST00000339223	2359	NM_002030	formyl peptide receptor 3
A_24_P251734	0.000367103	0.030042	-5.24304	-2.3904	5.24304	down	3.20963	20.1101	4.47032	26.4692	4.36105	19.7324	-1.17579	1.15979	-1.10268	1.37871	-1.25155	1.10268	FSTL5	Homo sapiens follistatin-like 5 (FSTL5), transcript variant 1, mRNA [NM_020116]	TAAAGTGTCTGTGACTTAATGATTTCATGTAAGTCTGTCGCATACATCCTTCTTTTGTAG	ENST00000379164	56884	NM_020116	follistatin-like 5
A_24_P393740	0.00104684	0.0322856	-9.11191	-3.18775	9.11191	down	116.608	1143.14	111.828	1164.55	152.604	1317.11	-1.41534	1.56605	-1.8806	1.41534	-1.54526	1.74067	FYB	Homo sapiens FYN binding protein (FYB), transcript variant 1, mRNA [NM_001465]	GATCAAGAGAATATTTCAGAGTTTTGGTTTACACATCAAGAAACAGACACACATACCTAG	ENST00000351578	2533	NM_001465	FYN binding protein
A_32_P89899	0.00411327	0.0411607	-4.54462	-2.18416	4.54462	down	43.8473	231.325	59.123	251.441	40.8451	199.01	-0.933512	1.15399	-0.907146	1.09681	-1.55387	0.907146	GABRG1	Homo sapiens gamma-aminobutyric acid (GABA) A receptor, gamma 1 (GABRG1), mRNA [NM_173536]	TAAAAGAATTGTTATTGTTGGACAATGAAACATACCTGGACCCTTTGAGTGTGTGAATAG	ENST00000295452	2565	NM_173536	gamma-aminobutyric acid (GABA) A receptor, gamma 1
A_24_P212539	0.00109768	0.0323595	-4.36314	-2.12537	4.36314	down	238.49	1205.45	238.562	1076.07	228.127	967.957	-0.839696	1.18602	-1.24413	0.844742	-1.42182	0.839696	GALM	Homo sapiens galactose mutarotase (aldose 1-epimerase) (GALM), mRNA [NM_138801]	TCCAGTTCTCGCGCATCAGTCCAGATGGTGAAGAAGGCTACCCCGGAGAGTTAAAAGTCT	ENST00000444351	130589	NM_138801	galactose mutarotase (aldose 1-epimerase)
A_33_P3255304	0.00725464	0.0488507	-6.54031	-2.70936	6.54031	down	11.3239	118.189	29.927	153.809	18.2768	111.02	-1.97448	1.09731	-0.97727	1.29988	-1.80187	0.97727	GGT5	Homo sapiens gamma-glutamyltransferase 5 (GGT5), transcript variant 1, mRNA [NM_001099781]	TCCCACCCTCTCGATCTGTATATCCTCCAGTCCAAGATTAAAGAGGCGGACTGTGGCCTG	ENST00000327365	2687	NM_001099781	gamma-glutamyltransferase 5
A_23_P208866	0.000227638	0.0298991	-8.85599	-3.14665	8.85599	down	3223.96	33339.9	3527.75	33437.8	3725.31	30744.1	-1.44262	1.61586	-1.71757	1.44262	-1.75213	1.46916	GMFG	Homo sapiens glia maturation factor, gamma (GMFG), transcript variant 1, mRNA [NM_004877]	CTCCAAGAAAAGTTGTCTTTCTTTCGTTGATCTCTGGGCTGGGGACTGAATTCCTGATGT	ENST00000601731	9535	NM_004877	glia maturation factor, gamma
A_23_P37892	3.99537e-05	0.0285211	-4.14741	-2.05221	4.14741	down	292.998	1489.06	316.767	1417.28	381.287	1393.23	-0.892416	1.14117	-1.18475	0.892416	-1.03046	1.01543	GPT2	Homo sapiens glutamic pyruvate transaminase (alanine aminotransferase) 2 (GPT2), transcript variant 1, mRNA [NM_133443]	ATTTGCTTTCAAAATAAATAAGGTCAGCTAGTCTAGGAGGTTAACGTCGGGTAGGAATGC	ENST00000569193	84706	NM_133443	glutamic pyruvate transaminase (alanine aminotransferase) 2
A_23_P109286	0.00144649	0.033597	-7.95189	-2.9913	7.95189	down	16.7416	163.682	18.2715	177.427	24.7181	152.469	-1.44474	1.53278	-1.72345	1.47164	-1.40064	1.40064	GRIK1	Homo sapiens glutamate receptor, ionotropic, kainate 1 (GRIK1), transcript variant 1, mRNA [NM_000830]	TTCTCCTTACCGGGATAAAATTACTATTGCTATTCTTCAACTCCAAGAAGAAGGGAAGCT	ENST00000309434	2897	NM_000830	glutamate receptor, ionotropic, kainate 1
A_24_P52697	0.000536467	0.0319891	-7.66895	-2.93903	7.66895	down	162.957	1670.17	189.154	1559.79	269.361	1674.2	-1.48823	1.55734	-1.67803	1.28122	-1.28122	1.53106	H19	Homo sapiens H19, imprinted maternally expressed transcript (non-protein coding) (H19), long non-coding RNA [NR_002196]	CGTCCCTTCTGAATTTAATTTGCACTAAGTCATTTGCACTGGTTGGAGTTGTGGAGACGG	ENST00000411754	283120	NR_002196	H19, imprinted maternally expressed transcript (non-protein coding)
A_19_P00323082	0.000815851	0.0322856	-7.07849	-2.82344	7.07849	down	74.1224	726.835	99.0305	690.5	97.1802	587.114	-1.32857	1.65322	-1.31547	1.40176	-1.45585	1.31547	H19	Homo sapiens H19, imprinted maternally expressed transcript (non-protein coding) (H19), long non-coding RNA [NR_002196]	AGCTAGAGGAACCAGACCTCATCAGCCCAACATCAAAGACACCATCGGAACAGCAGCGCC	ENST00000447298	283120	NR_002196	H19, imprinted maternally expressed transcript (non-protein coding)
A_33_P3270311	0.00312111	0.0384622	-31.415	-4.97338	31.415	down	6.42089	345.148	12.7675	300.794	14.2789	407.133	-2.84776	2.58867	-2.261	2.21276	-2.21276	2.79719	HECW2	Homo sapiens HECT, C2 and WW domain containing E3 ubiquitin protein ligase 2 (HECW2), mRNA [NM_020760]	GGGTTATAGAAATCTGGAAATAAGAAAGGAAGAGCTCTCTGTATTCTATAATTGGAAGAG	ENST00000260983	57520	NM_020760	HECT, C2 and WW domain containing E3 ubiquitin protein ligase 2
A_23_P6596	0.000737905	0.0322202	-6.62887	-2.72876	6.62887	down	23.2352	172.733	20.7013	155.248	33.6181	204.568	-1.13287	1.44942	-1.70433	1.11798	-1.11798	1.6637	HES1	Homo sapiens hes family bHLH transcription factor 1 (HES1), mRNA [NM_005524]	AGTCATCAAAGCCTATTATGGAGAAAAGACGAAGAGCAAGAATAAATGAAAGTCTGAGCC	ENST00000476918	3280	NM_005524	hes family bHLH transcription factor 1
A_23_P86315	0.0069589	0.0482514	-4.73701	-2.24398	4.73701	down	51.8092	395.437	96.1273	424.884	98.3501	360.908	-1.4728	1.1475	-0.985927	1.07365	-1.06612	0.985927	HFE2	Homo sapiens hemochromatosis type 2 (juvenile) (HFE2), transcript variant a, mRNA [NM_213653]	CTCTTTGTTCTGTGGCTTTGCATTCAGTAAGGGGACCATCAGTCCCATTACTAGTTTGGA	ENST00000357836	148738	NM_213653	hemochromatosis type 2 (juvenile)
A_24_P363548	0.00208554	0.035885	-5.01312	-2.32571	5.01312	down	134.26	953.075	115.948	611.174	179.083	702.265	-0.848612	1.66709	-1.46502	0.848612	-0.95104	1.19676	HIP1	Homo sapiens huntingtin interacting protein 1 (HIP1), transcript variant 1, mRNA [NM_005338]	ATGACACACCTTGGATTAAAACGGGAATCACATCTTAAAGCTAAAAATGAACCTGCAAGC	ENST00000336926	3092	NM_005338	huntingtin interacting protein 1
A_33_P3257678	0.00369607	0.0404245	-7.03924	-2.81542	7.03924	down	8303.75	62845.5	8018.57	54566	7265.2	57306.4	-1.11342	1.4947	-1.5687	1.11342	-1.82421	1.33182	HIST2H3A	Homo sapiens histone cluster 2, H3a (HIST2H3A), mRNA [NM_001005464]	AAGAAGTGGCGGTTCGGCCGGAGGTTCCATCGTATCCAAAAGGCTCTTTTCAGAGCCACC	ENST00000369158	333932	NM_001005464	histone cluster 2, H3a
A_33_P3229335	0.000687414	0.0319891	-4.08914	-2.0318	4.08914	down	170.626	932.305	200.531	834.026	243.295	852.555	-0.89996	1.23814	-1.07184	0.89996	-0.906122	1.07937	HIST3H2BB	Homo sapiens histone cluster 3, H2bb (HIST3H2BB), mRNA [NM_175055]	AGTACACCAGCTCCAAGTGAGGCGTTCCTCGGCGTCCTGAACCCAAAGGCTCTTTTCAGA	ENST00000620438	128312	NM_175055	histone cluster 3, H2bb
A_23_P56734	0.0037257	0.0404809	-6.39913	-2.67788	6.39913	down	19.063	185.06	38.0761	256.323	32.6662	152.549	-1.62602	1.34126	-1.03278	1.63376	-1.36703	1.03278	HNMT	Homo sapiens histamine N-methyltransferase (HNMT), transcript variant 1, mRNA [NM_006895]	CCTTTTGTCCACCATGGATATATCTGACTGCTTTATTGATGGTAATGAAAATGGAGACCT	ENST00000485653	3176	NM_006895	histamine N-methyltransferase
A_23_P114903	0.00351506	0.0400217	-11.9225	-3.57562	11.9225	down	137.329	2611.09	265.938	2593.24	200.349	2132.93	-2.08204	1.85503	-1.53346	1.66766	-2.0552	1.53346	HSPA6	Homo sapiens heat shock 70kDa protein 6 (HSP70B') (HSPA6), mRNA [NM_002155]	CAAAATGCAAGACAAGTGTCGGGAAGTCCTTGCCTGGCTGGAGCACAACCAGCTGGCAGA	ENST00000309758	3310	NM_002155	heat shock 70kDa protein 6 (HSP70B')
A_23_P104798	0.000935484	0.0322856	-4.73913	-2.24462	4.73913	down	110.423	711.749	168.69	791.197	155.642	638.211	-1.19792	1.17855	-0.991451	1.15374	-1.22076	0.991451	IL18	Homo sapiens interleukin 18 (IL18), transcript variant 1, mRNA [NM_001562]	TTGAATGACCAAGTTCTCTTCATTGACCAAGGAAATCGGCCTCTATTTGAAGATATGACT	ENST00000528832	3606	NM_001562	interleukin 18
A_23_P72096	0.00118469	0.0327726	-27.399	-4.77605	27.399	down	2.453	104.714	4.02121	102.518	3.82629	84.2234	-2.5341	2.56981	-2.22588	2.36176	-2.41073	2.22588	IL1A	Homo sapiens interleukin 1, alpha (IL1A), mRNA [NM_000575]	TTATTATTCTTCATAACAATTTTAGGAGGACCAGAGCTACTGACTATGGCTACCAAAAAG	ENST00000263339	3552	NM_000575	interleukin 1, alpha
A_23_P91850	0.000204411	0.0298991	-10.1729	-3.34666	10.1729	down	1199.53	14275.7	1277.23	14562.1	1618.77	14627.9	-1.55617	1.70498	-1.87048	1.55617	-1.64177	1.71038	IL20RB	Homo sapiens interleukin 20 receptor beta (IL20RB), mRNA [NM_144717]	TATGTGTGCAATGCGACGAGAATGCAGAAGTCAGTAACATGTGCATGTTTGTTGTGCTCC	ENST00000475972	53833	NM_144717	interleukin 20 receptor beta
A_24_P227927	0.00703469	0.0483877	-5.92155	-2.56597	5.92155	down	37.1528	287.76	59.4689	281.651	34.422	226.926	-1.27143	1.37003	-0.997628	1.1616	-1.8996	0.997628	IL21R	Homo sapiens interleukin 21 receptor (IL21R), transcript variant 2, mRNA [NM_181078]	GGAAATTGGCGATGTCACCCGTGTACGGTACGCAGCCCAGAGCAGACCCTCAATAAACGT	ENST00000564089	50615	NM_181078	interleukin 21 receptor
A_23_P76078	0.00359638	0.0401852	-4.72107	-2.23911	4.72107	down	3460.55	17867	4156.11	19683.5	3726.38	18676.3	-1.00929	1.04707	-1.14992	1.00929	-1.42055	1.08122	IL23A	Homo sapiens interleukin 23, alpha subunit p19 (IL23A), mRNA [NM_016584]	GAAGGGAAATTTGGGGATTATTTATCCTCCTGGGGACAGTTTGGGGAGGATTATTTATTG	ENST00000228534	51561	NM_016584	interleukin 23, alpha subunit p19
A_23_P15146	0.00554471	0.0448648	-9.14794	-3.19345	9.14794	down	172.201	1955.09	201.533	2603.98	327.452	1990.22	-1.79914	1.39406	-1.97709	1.63007	-1.38999	1.38999	IL32	Homo sapiens interleukin 32 (IL32), transcript variant 1, mRNA [NM_001012631]	GGAGGAGCTGACACCCCAGAAGTGCTCTGAACCCCAATCCTCAAAATGAAGATACTGACA	ENST00000529550	9235	NM_001012631	interleukin 32
A_33_P3346826	0.00141425	0.0334244	-4.33475	-2.11595	4.33475	down	156.992	942.229	244.352	1078.5	256.407	918.216	-1.21996	1.05356	-0.986558	1.07096	-1.03025	0.986558	IL32	Homo sapiens interleukin 32 (IL32), transcript variant 4, mRNA [NM_001012633]	AGAAAGAGATGGATTACGGTGCCGAGGCAACAGATCCCCTGTCCCGGATGTTGAGGATCC	ENST00000528652	9235	NM_001012633	interleukin 32
A_24_P141707	0.00390174	0.0407831	-16.2379	-4.0213	16.2379	down	56.5506	1441.1	117.413	1436.86	89.1845	1426.03	-2.4135	1.94611	-1.7644	1.7644	-2.27429	1.90119	INHBE	Homo sapiens inhibin, beta E (INHBE), mRNA [NM_031479]	GGTCTACCCAGAAAGCATGATTTCCTGCCCTAAGTCCTGTGAGAAGATGTCAGGGACTAG	ENST00000266646	83729	NM_031479	inhibin, beta E
A_23_P6535	0.002331	0.0365542	-49.0232	-5.61539	49.0232	down	9.82457	714.502	12.2121	773.835	23.0402	686.034	-3.24789	2.62465	-3.33891	2.56227	-2.53623	2.53623	KLHDC7B	Homo sapiens kelch domain containing 7B (KLHDC7B), mRNA [NM_138433]	TTTTCTCCCCTTACGCACTTTGAAACCCATGCTAGAAAAGTGAATACATCTGACTGTGCT	ENST00000395676	113730	NM_138433	kelch domain containing 7B
A_23_P212655	0.00309487	0.0383411	-4.66139	-2.22076	4.66139	down	52.8877	357.557	110.765	475.672	74.7307	303.635	-1.42067	1.02464	-0.75904	1.25896	-1.43993	0.75904	KLHL6	Homo sapiens kelch-like family member 6 (KLHL6), mRNA [NM_130446]	TTCTGGTCTCAATGGCTTCGGGAAACACACATATACACATACACCATGCCCTTGAACTCA	ENST00000468734	89857	NM_130446	kelch-like family member 6
A_24_P944253	0.00445578	0.0421096	-4.40484	-2.13909	4.40484	down	50.8046	289.905	78.279	302.538	66.3139	299.303	-1.15177	1.04891	-0.932974	0.932974	-1.28546	1.06518	KLHL6	Homo sapiens kelch-like family member 6 (KLHL6), mRNA [NM_130446]	CCTGGCTCATTTCTTGTTTCGGCAAGTCTGCTAAAAGATTCACTCAGCACAGCAGGGAAA	ENST00000489245	89857	NM_130446	kelch-like family member 6
A_23_P55448	3.88631e-05	0.0285211	-4.82689	-2.27109	4.82689	down	43.9829	264.126	49.4194	248.411	54.5655	236.769	-1.00419	1.27016	-1.24092	1.00419	-1.21118	1.08265	KRT12	Homo sapiens keratin 12, type I (KRT12), mRNA [NM_000223]	TCAAAATTACCTTATATCCTTCTGGACAACTGGAGTAGTCTTTTAACGAACTTTCTTCTG	ENST00000251643	3859	NM_000223	keratin 12, type I
A_23_P116850	0.00289094	0.0380046	-6.68284	-2.74046	6.68284	down	2.59316	25.2309	4.27722	31.2746	5.11621	24.9978	-1.69486	1.27568	-1.37777	1.40801	-1.23253	1.23253	KRT2	Homo sapiens keratin 2, type II (KRT2), mRNA [NM_000423]	GTTAAATTTTTGTCATTTATCTCTGATGGCACTTTGAGGGAAAAGAATGTCCACATACAG	ENST00000309680	3849	NM_000423	keratin 2, type II
A_33_P3338121	0.00067569	0.0319891	-4.68538	-2.22817	4.68538	down	235.217	1413.15	262.475	1367.26	321.024	1228.83	-1.0218	1.2532	-1.26847	1.02809	-1.09114	1.0218	LAMB3	Homo sapiens laminin, beta 3 (LAMB3), transcript variant 2, mRNA [NM_001017402]	ACAAAGATGGTGGAGATTGGCATGCCATTGAAACTAAGAGCTCTCAAGTCAAGGAAGCTG	ENST00000367030	3914	NM_001017402	laminin, beta 3
A_23_P29773	0.00291545	0.0380403	-4.40332	-2.13859	4.40332	down	252.61	1239.51	289.878	1288.85	278.224	1268.1	-0.93088	1.05204	-1.13721	0.93088	-1.30958	1.05518	LAMP3	Homo sapiens lysosomal-associated membrane protein 3 (LAMP3), mRNA [NM_014398]	ACCATGTTGACTTTCCTCATGTGTTTCCTTATGACTCAGTAAGTTGGCAAGGTCCTGACT	ENST00000265598	27074	NM_014398	lysosomal-associated membrane protein 3
A_23_P86283	0.000420689	0.030523	-22.972	-4.52181	22.972	down	170.365	5096.74	190.572	5025.19	296.264	5302.43	-2.33668	2.25433	-2.57984	2.05646	-2.05646	2.28165	LAPTM5	Homo sapiens lysosomal protein transmembrane 5 (LAPTM5), mRNA [NM_006762]	CATCATAAAACAGTCCCTTCAAACACACAATTGTTCTGCTGAAGAGTTGTCATCAACAAT	ENST00000294507	7805	NM_006762	lysosomal protein transmembrane 5
A_33_P3237977	0.0076861	0.0498757	-22.1157	-4.467	22.1157	down	5.31123	107.618	2.79187	112.89	6.47286	99.5296	-1.94319	2.08568	-3.27587	1.9772	-2.17587	1.94319	LARP6	Homo sapiens La ribonucleoprotein domain family, member 6 (LARP6), transcript variant 2, mRNA [NM_197958]	GCCTTATCTTATTCCTTTTTGTATTTCCATACCTAGCCTAATACCTAGCTTATATAAGGG	ENST00000344870	55323	NM_197958	La ribonucleoprotein domain family, member 6
A_23_P117782	0.00147308	0.0336722	-9.63859	-3.26882	9.63859	down	2.51753	27.175	2.36737	22.5547	2.85047	28.9065	-1.33701	1.78333	-1.83059	1.33701	-1.67585	1.84269	LARP6	Homo sapiens La ribonucleoprotein domain family, member 6 (LARP6), transcript variant 1, mRNA [NM_018357]	GCAAGTAGCTAAGCCTATAGCATGGTGTCTTGTAGGACCAAATCGATGTTACCTGTCAAG	ENST00000299213	55323	NM_018357	La ribonucleoprotein domain family, member 6
A_23_P30547	0.000398602	0.030042	-8.17421	-3.03108	8.17421	down	173.441	1909.05	284.379	2324.81	240.2	1698.07	-1.62913	1.51934	-1.32063	1.62613	-1.67738	1.32063	LCP2	Homo sapiens lymphocyte cytosolic protein 2 (SH2 domain containing leukocyte protein of 76kDa) (LCP2), mRNA [NM_005565]	TCTGTTGCCAACACGAGATCAATCAGCCTTGGTCAATGGACAAACACTTAGGACTGAACT	ENST00000520322	3937	NM_005565	lymphocyte cytosolic protein 2 (SH2 domain containing leukocyte protein of 76kDa)
A_21_P0010896	0.00767876	0.04987	-4.95659	-2.30935	4.95659	down	23.5466	190.631	44.1843	191.278	43.8758	177.548	-1.51795	1.18738	-1.0148	1.0148	-1.13807	1.05505	LINC00864	Homo sapiens long intergenic non-protein coding RNA 864 (LINC00864), long non-coding RNA [NR_046091]	GACGTTATGGTTAATTTCACCAATTTGGTAACCTGCCTCATGGGAAGTACGAAAGTAAGC		728218		long intergenic non-protein coding RNA 864
A_33_P3620881	0.00309138	0.0383411	-4.74037	-2.245	4.74037	down	14.9899	74.1653	16.6913	91.9125	20.5972	93.791	-0.997446	0.997446	-1.2472	1.12949	-1.05702	1.30639	LINC00864	Homo sapiens long intergenic non-protein coding RNA 864 (LINC00864), long non-coding RNA [NR_046091]	ACTAACCAAGACCTCTGTAAGAATTCTGTCTTTGATTCCACAATAAAGTGGTGTGAAATT	ENST00000582543	728218	NR_046091	long intergenic non-protein coding RNA 864
A_19_P00322310	7.39612e-05	0.0285211	-4.66825	-2.22288	4.66825	down	22.1881	131.4	22.8088	113.154	21.8063	87.9444	-0.822591	1.43165	-1.18766	1.0385	-1.36566	0.822591	LINC01094	Homo sapiens long intergenic non-protein coding RNA 1094 (LINC01094), transcript variant 1, long non-coding RNA [NR_038303]	TGGTAACCACTTGCCAGCTGCAACTTTGACGCATATTATCAGGATAGGTGAGATTGATGG	ENST00000504675	100505702	NR_038303	long intergenic non-protein coding RNA 1094
A_19_P00316324	0.00138412	0.0332716	-4.97253	-2.31398	4.97253	down	41.3606	278.645	59.0758	277.859	58.2022	263.023	-1.18407	1.25617	-1.07462	1.07462	-1.20928	1.14317	LINC01132	Homo sapiens long intergenic non-protein coding RNA 1132 (LINC01132), long non-coding RNA [NR_038856]	TTGATCTCATTCTTTCACCATCAAAGGGGAATGCAGTAGTGCCAGCAGGAGCAGAAAAAA	ENST00000437601	100506810	NR_038856	long intergenic non-protein coding RNA 1132
A_19_P00809368	0.00461325	0.0425456	-4.91275	-2.29653	4.91275	down	71.2361	455.946	131.538	556.853	84.1664	428.956	-1.36423	1.00209	-0.884297	1.11305	-1.64163	0.884297	LINC01215	Homo sapiens long intergenic non-protein coding RNA 1215 (LINC01215), transcript variant 1, long non-coding RNA [NR_110028]	TTTGCTTTAAATTGAGTTTCCTTGCCATTGCACACTCCTATCTTTCTGAACACACACCAC	ENST00000607746	101929623	NR_110028	long intergenic non-protein coding RNA 1215
A_21_P0011334	0.00336293	0.0395878	-14.8235	-3.88981	14.8235	down	11.091	235.035	15.7396	180.899	15.5989	242.964	-1.81927	2.27428	-1.71912	1.71912	-1.84525	2.29239	LINC01583	Homo sapiens long intergenic non-protein coding RNA 1583 (LINC01583), long non-coding RNA [NR_120367]	TTACACATGCGTGTTGTGGACAACTTGAGAAAACACTTGTCTGCAGGAAGATGAAATTAA	ENST00000559788	101929690	NR_120367	long intergenic non-protein coding RNA 1583
A_23_P84219	0.00121813	0.032961	-4.48595	-2.16541	4.48595	down	68.474	419.229	68.7749	324.299	88.2082	321.245	-0.877179	1.42507	-1.27572	0.877179	-1.02986	1.01124	LIPH	Homo sapiens lipase, member H (LIPH), mRNA [NM_139248]	AGCATGAGGCAAGGGAAGGAAAAGCAGAGCTTATTTTTCACCTAAGGTGGAGAAGGATCA	ENST00000296252	200879	NM_139248	lipase, member H
A_33_P3774867	0.000113275	0.0298991	-9.38683	-3.23064	9.38683	down	284.392	3178.07	241.412	2405.27	277.55	2401.32	-1.29545	1.87488	-1.93671	1.29545	-1.84862	1.4408	lnc-AP002478.1-1	Homo sapiens cDNA clone IMAGE:30412101. [BC094703]	TTTAAAGCCACCCAAGTCAGGGACATCCTTTTTCTTCCTCTGGACTTTGTCATCTGCAAG			BC094703	lnc-AP002478.1-1:3
A_21_P0011399	0.00731353	0.049052	-5.14729	-2.36381	5.14729	down	9.96544	58.3139	14.1315	63.9137	11.8314	71.0058	-1.14542	1.09156	-1.04637	1.04637	-1.41584	1.34589	lnc-APBA2-1	Homo sapiens cDNA clone IMAGE:4824834. [BC066982]	CGCAGAACCCTGTAAATGAGCATAGTTCATTCAAGTATATAAAGTGCTTTCGTGTATTAT				lnc-APBA2-1:3
A_21_P0012730	8.17628e-05	0.0285211	-5.87313	-2.55413	5.87313	down	320.329	2302.08	432.316	2645.1	483.02	2591.86	-1.30397	1.22948	-1.27631	1.25239	-1.22948	1.37076	lnc-BMP2K-1	LNCipedia lincRNA (lnc-BMP2K-1), lincRNA [lnc-BMP2K-1:5]	CTTCCTCATATTAATTGCCATAAAAACAAGTCACTTCTATCATGCATTTGGCTCATTGAG				lnc-BMP2K-1:5
A_21_P0012599	7.92275e-05	0.0285211	-4.32725	-2.11345	4.32725	down	670.967	3612.11	887.825	4161.57	948.619	3547.66	-1.03047	1.0862	-1.0313	1.11301	-1.04891	1.03047	lnc-BMP2K-1	LNCipedia lincRNA (lnc-BMP2K-1), lincRNA [lnc-BMP2K-1:8]	AATTTCAGAAGATGCAATGCCTGAATGGCTCACTTTGCAGGAAAACAGAAGAACCAAGGT				lnc-BMP2K-1:8
A_21_P0014427	0.00743348	0.0494728	-6.06092	-2.59954	6.06092	down	45.6622	426.798	83.8191	397.778	57.8338	338.095	-1.50907	1.40355	-1.03766	1.12448	-1.68619	1.03766	lnc-CHADL-1	Homo sapiens cDNA FLJ32615 fis, clone STOMA2000148. [AK057177]	GGAATTCACCAGGCTCCTCTGTGGATTTACAAATGATGATATTTTAACATGGTTCAAATA			AK057177	lnc-CHADL-1:1
A_21_P0014234	0.00670467	0.0476826	-5.21396	-2.38238	5.21396	down	30.8461	165.9	30.0904	153.595	33.9173	203.954	-0.91332	1.20197	-1.35397	0.91332	-1.29442	1.47014	lnc-CTSL1-1	PREDICTED: Homo sapiens DAPK1 intronic transcript 1 (non-protein coding) (DAPK1-IT1), misc_RNA [XR_171053]	GAGGCATGTTTTTAGCTGAATAGCAATAATTATGGGATTGTGCAATACTGGAAGAAGCAG			XR_171053	lnc-CTSL1-1:1
A_21_P0006483	0.00235306	0.0365542	-4.17565	-2.062	4.17565	down	37.9599	223.955	60.4165	240.032	54.1489	195.893	-1.14575	1.10305	-0.880145	1.0256	-1.15132	0.880145	lnc-EGFL6-2	LNCipedia lincRNA (lnc-EGFL6-2), lincRNA [lnc-EGFL6-2:1]	ATGTGTAGTATCTAACCAAGCTGGGCATAGTTGCATGTGCCTATAGTATGAGCTACTCTG				lnc-EGFL6-2:1
A_21_P0003704	0.00353583	0.0400246	-4.21607	-2.0759	4.21607	down	38.5936	177.276	35.051	151.859	37.2396	163.326	-0.743483	1.14422	-1.28725	0.743483	-1.31304	0.996212	lnc-FRG1-5	LNCipedia lincRNA (lnc-FRG1-5), lincRNA [lnc-FRG1-5:3]	AATCTTGTGCATGTTACAGGGAAGCACTGTCCTACATCGTATCTGACAGGCTCTCATAGT				lnc-FRG1-5:3
A_33_P3407863	0.00148328	0.0336772	-4.1893	-2.06671	4.1893	down	54.7051	297.369	77.7264	368.614	92.0529	305.769	-1.1817	0.948944	-1.07983	1.08133	-0.948944	0.959372	lnc-GABRE-1	PREDICTED: Homo sapiens uncharacterized LOC100507199, transcript variant 1 (LOC100507199), misc_RNA [XR_133565]	ACCAAAACAGTGAGGAGACCTCCACCTTCTTCAGTGTCTCCCTGAGCAGTCAGTAATTTC			XR_133565	lnc-GABRE-1:3
A_33_P3296230	0.0063451	0.0469858	-4.29537	-2.10278	4.29537	down	44.0461	261.528	111.323	401.594	63.352	272.996	-1.59541	0.662604	-0.662604	1.10391	-1.58907	0.694759	lnc-KLHDC5-1	HUMPTHL parathyroid-like protein precursor {Homo sapiens} (exp=-1; wgp=0; cg=0), partial (11%) [THC2730443]	ATTTCTCTGGAGCCTCTCAGCACTTACTTATTTAGCAACCGGCTACTCCAACTGTGCTTT				lnc-KLHDC5-1:1
A_21_P0001704	0.000167711	0.0298991	-4.22318	-2.07833	4.22318	down	183.261	995.817	197.055	874.367	249.977	909.505	-0.882502	1.24762	-1.18267	0.882502	-0.952641	1.08706	lnc-NBPF16-4	LNCipedia lincRNA (lnc-NBPF16-4), lincRNA [lnc-NBPF16-4:2]	GATCTGCTGGTAGTGTTTAGTCTTTGTTCTGAGCTGATATGTGTTAGTAGCTTTTTGTTT				lnc-NBPF16-4:2
A_21_P0009965	0.00144835	0.033597	-11.0689	-3.46845	11.0689	down	63.5351	854.403	67.3024	934.666	95.8477	810.64	-1.70348	1.73394	-2.02524	1.68601	-1.62833	1.62833	lnc-NCOA3-11	Q4J185_AZOVI (Q4J185) Membrane-bound metal-dependent hydrolase, partial (5%) [THC2638461]	AGAACCCTCAAGAATAATCCCTTCTCATGAAATGTAGCAGTCAGGAAAACTGCAGAGGAA				lnc-NCOA3-11:1
A_21_P0007504	0.00199112	0.0354301	-10.4393	-3.38395	10.4393	down	4.04011	43.1092	3.57719	40.7568	3.38514	36.8942	-1.42262	1.68105	-2.00305	1.42262	-2.19583	1.42669	lnc-P2RX7-1	Homo sapiens cDNA FLJ41454 fis, clone BRSTN2011597. [AK123448]	CTTTCCCTACTCCATGAAACATTTGCGCTATATATGCGGCCAAATGGAATGTTTCTCTTT				lnc-P2RX7-1:1
A_21_P0008663	0.000531623	0.0319891	-6.81891	-2.76954	6.81891	down	204.362	1807.02	305.698	2022.91	313.671	1979.59	-1.49701	1.33555	-1.32089	1.32089	-1.39692	1.43738	lnc-RP11-597K23.2.1-2	BC011509 Cox15 protein {Mus musculus} (exp=-1; wgp=0; cg=0), partial (5%) [THC2616036]	CCACACTGACACTTGCTGTGCCATTGATTTGACTTTTCTCCTATCTTAACAATAACAAAT				lnc-RP11-597K23.2.1-2:1
A_21_P0006238	0.00541052	0.0447722	-7.66882	-2.939	7.66882	down	13.9431	128.402	19.8972	126.957	15.0055	134.14	-1.40277	1.48842	-1.29462	1.29462	-1.81486	1.52173	lnc-RXRA-1	LNCipedia lincRNA (lnc-RXRA-1), lincRNA [lnc-RXRA-1:1]	TCTTTGTGAGGTAGGGTGGAACTTGCATCCTGAACATTAAAGTTTACATGCCAAGGAGGG				lnc-RXRA-1:1
A_21_P0002189	0.00109648	0.0323595	-7.42941	-2.89325	7.42941	down	56.0131	497.618	56.9086	408.975	60.7375	454.358	-1.18942	1.64992	-1.5714	1.18942	-1.59063	1.48895	lnc-SLC4A1AP-1	LNCipedia lincRNA (lnc-SLC4A1AP-1), lincRNA [lnc-SLC4A1AP-1:8]	CCATCTCCCAGGAATTTGGATGCCTAGAACACAACAATTCTTTTAATCTTCTAAGTTAAA				lnc-SLC4A1AP-1:8
A_33_P3455785	0.0024261	0.0367956	-5.09685	-2.3496	5.09685	down	268.502	1652.02	334.256	1597.1	358.134	1878.6	-1.04156	1.26781	-1.1304	1.04156	-1.14402	1.42347	lnc-STEAP1B-1	Homo sapiens cDNA clone IMAGE:5221458. [BC039682]	GAATGGGGTGAGGGTATCTATTGCATCTATTTTATGGTAATAAAAGGAAGTTGAAAGTTC			BC039682	lnc-STEAP1B-1:1
A_19_P00801585	0.00181924	0.0345911	-4.34081	-2.11796	4.34081	down	204.904	1139.65	201.106	1011.98	264.738	901.078	-0.897542	1.26617	-1.32939	0.917283	-1.04596	0.897542	lnc-UQCRFS1-7	Q982T4_RHILO (Q982T4) Mll8506 protein, partial (12%) [THC2612479]	ACCTTAGACATGGCAAGGTGAGAGCTGTCTGTTCATCTTAGACATGACAAGCTGGCAGCT				lnc-UQCRFS1-7:1
A_33_P3343516	0.00363915	0.0402213	-4.19163	-2.06751	4.19163	down	39.926	180.699	43.8778	191.244	44.615	193.994	-0.885341	0.980988	-1.15404	0.885341	-1.24317	1.05364	LOC100129617	Homo sapiens uncharacterized LOC100129617 (LOC100129617), long non-coding RNA [NR_045112]	GGATGAGCAAACTGAAGCTTTGAGAGTCTCAAAGAATGTTCTTTACTAGACTGAAATAAA	ENST00000566462	100129617	NR_045112	uncharacterized LOC100129617
A_24_P935682	0.00201041	0.0355173	-5.52477	-2.46591	5.52477	down	34.0476	223.321	27.2013	185.036	39.0093	171.713	-0.976425	1.4252	-1.70517	0.976425	-1.29819	1.01633	LOC100131541	Homo sapiens clone DNA166629 MRSS6228 (UNQ6228) mRNA, complete cds. [AY358248]	AGTCAGTAATCAGCATTCAATCAATATGAGCTCTAACATGATGCTTGACAGTTATGCAAC		100131541	AY358248	uncharacterized LOC100131541
A_21_P0010449	0.00318149	0.038692	-8.13617	-3.02435	8.13617	down	2.73014	21.7686	2.35662	23.2386	2.85196	22.753	-1.30007	1.38327	-1.9172	1.30007	-1.75513	1.41732	LOC100506737	PREDICTED: Homo sapiens uncharacterized LOC100506737 (LOC100506737), ncRNA [XR_172388]	TTCCTCTGAGGTTTCACTTCTTGTCCACACAAGACTTTAATAAAATGTGGCATCTAACTG		100506737	XR_172388	uncharacterized LOC100506737
A_21_P0014093	0.00482949	0.0430474	-5.71677	-2.5152	5.71677	down	104.591	681.077	122.366	635.827	131.461	845.416	-1.05727	1.33393	-1.23569	1.05727	-1.24543	1.61601	LOC101927482	Homo sapiens uncharacterized LOC101927482 (LOC101927482), transcript variant 1, long non-coding RNA [NR_110225]	GGGATGCTTATTTTGTTTGCTTTGTAAGAAATGCTTCTGATTCAGTAACTGGGCAATTTA		101927482	NR_110225	uncharacterized LOC101927482
A_21_P0005634	0.0072225	0.0487831	-4.49778	-2.16921	4.49778	down	6.08533	31.5635	11.7137	46.8291	6.77385	34.6186	-1.30146	0.761533	-0.761533	1.15321	-1.66485	0.865059	LOC101927657	Homo sapiens uncharacterized LOC101927657 (LOC101927657), long non-coding RNA [NR_125421]	TGAGATGTTGCTAAGGCATAAAGAGCAAGACAGAGAGTGTCAGAAGATGACACTGACGTC	ENST00000500180	101927657	NR_125421	uncharacterized LOC101927657
A_21_P0004100	0.000994943	0.0322856	-7.34421	-2.87661	7.34421	down	34.8994	357.204	51.8511	365.084	51.8679	332.05	-1.53196	1.51165	-1.36566	1.36566	-1.47836	1.37654	LOC101929412	Homo sapiens uncharacterized LOC101929412 (LOC101929412), long non-coding RNA [NR_104606]	AGAAACAGGAAGTACCTCCAGGATTCACCTAAATAGATGCTGCGGTTTCTATCAAACCAC	ENST00000510562	101929412	NR_104606	uncharacterized LOC101929412
A_32_P206104	0.000336681	0.0298991	-6.92813	-2.79247	6.92813	down	90.6639	728.818	94.7641	733.997	127.526	793.26	-1.26392	1.43118	-1.60497	1.26392	-1.28976	1.52365	LOC101929541	Homo sapiens uncharacterized LOC101929541 (LOC101929541), transcript variant 2, long non-coding RNA [NR_125983]	AGGAAAAGGAAACTTCACCGAAACTTCAGAAAGCTACAGAAATGACATCCATTTTCACAA	ENST00000431307	101929541	NR_125983	uncharacterized LOC101929541
A_21_P0004055	0.00164869	0.0340346	-18.083	-4.17656	18.083	down	4.12756	105.181	5.93911	90.0115	5.26031	93.8	-2.03875	2.32083	-1.91866	1.91866	-2.20693	2.12585	LOC102467226	Homo sapiens uncharacterized LOC102467226 (LOC102467226), long non-coding RNA [NR_104999]	GAGGGTCACAAACATTGTTTGAAATATCCATGCTTTTCATTTTGGAGTGAAAAGAGGAAA	ENST00000596736	102467226	NR_104999	uncharacterized LOC102467226
A_33_P3532659	0.000330777	0.0298991	-4.28748	-2.10013	4.28748	down	240.884	1303.79	293.939	1268.65	305.948	1202.18	-0.953776	1.17066	-1.07146	0.953776	-1.12686	1.02385	LOC102723888	PREDICTED: Homo sapiens uncharacterized LOC102723888 (LOC102723888), transcript variant X2, ncRNA [XR_425823]	TTACTTTTCCACAGCTGCTTCTTTTTGCTCAACCTAATATCAAAGCAGTTAGGTATTGCC		102723888	XR_425823	uncharacterized LOC102723888
A_21_P0013045	0.000928137	0.0322856	-6.21268	-2.63521	6.21268	down	10.8573	86.949	12.1837	86.2394	15.81	77.8934	-1.26224	1.4274	-1.50082	1.23811	-1.23811	1.23897	LOC102724087	PREDICTED: Homo sapiens uncharacterized LOC102724087 (LOC102724087), transcript variant X2, ncRNA [XR_426113]	CAAAATTACCTTGCATCAAAGACTGCACAAGAACTGCTCTAAGCGGAAGGACTGATGTCG		102724087		uncharacterized LOC102724087
A_33_P3672756	0.000143031	0.0298991	-27.2912	-4.77036	27.2912	down	26.6667	844.83	25.7471	798.98	42.1847	1015.82	-2.27968	2.39401	-2.73517	2.13603	-2.13603	2.63016	LOC284561	PREDICTED: Homo sapiens uncharacterized LOC284561 (LOC284561), misc_RNA [XR_110828]	CACATCCTAAGCCATCCAAAAGAGTTGGTTATATGATTGTCTTTGAATTCTATGACTGTT		284561	XR_110828	uncharacterized LOC284561
A_33_P3414880	0.00274506	0.0378041	-4.40007	-2.13753	4.40007	down	102.487	530.961	137.324	579.527	105.588	479.159	-0.950355	1.11094	-0.93308	1.05974	-1.42538	0.93308	LOC339192	PREDICTED: Homo sapiens uncharacterized LOC339192 (LOC339192), transcript variant X3, ncRNA [XR_424829]	TCAAGCCATTGCCAGCCACTCTTCACCCAAGGCCTGGTGGAATAAAGCTGGGCTAAGTAA		339192	XR_424829	uncharacterized LOC339192
A_21_P0012933	0.00254677	0.0370692	-6.76312	-2.75769	6.76312	down	39.0311	397.187	36.5669	234.353	49.7644	274.914	-1.04833	1.98693	-1.54728	1.04833	-1.21587	1.42633	LOC643201	Homo sapiens centrosomal protein 192kDa pseudogene (LOC643201), non-coding RNA [NR_036494]	CATTCTATTGGTACAAACTGGAAAGAAACCACGAGATTCAGGAATGACATCAGTACTGGG	ENST00000515403	643201		centrosomal protein 192kDa pseudogene
A_33_P3387646	0.000274183	0.0298991	-4.13111	-2.04653	4.13111	down	252.069	1246.78	324.568	1410.34	303.66	1160.12	-0.93038	1.06408	-0.970543	1.06444	-1.17977	0.93038	LOC643201	Homo sapiens centrosomal protein 192kDa pseudogene (LOC643201), non-coding RNA [NR_036494]	AGAGGATCCCGTGGAAGAATTCATATATGAATCAGATGAGAATGCCCCAGGACCATCGTA	ENST00000508056	643201	NR_036494	centrosomal protein 192kDa pseudogene
A_19_P00322118	0.00055393	0.0319891	-4.14295	-2.05066	4.14295	down	119.604	654.051	121.212	504.594	147.204	535.539	-0.793761	1.34551	-1.17936	0.793761	-1.01224	1.02734	LOC728730	Homo sapiens uncharacterized LOC728730 (LOC728730), long non-coding RNA [NR_037875]	GAAAAGAGAATACACAACCTTGTGATTGCTAGCAGTGAAAGCTCAGAGTTATGACATAAC		728730	NR_037875	uncharacterized LOC728730
A_21_P0000695	3.36108e-05	0.0285211	-9.03504	-3.17553	9.03504	down	67.4623	775.599	93.9667	893.783	100.942	792.92	-1.64225	1.56905	-1.56905	1.59619	-1.57891	1.57115	LOC731424	Homo sapiens uncharacterized LOC731424 (LOC731424), long non-coding RNA [NR_037867]	AGTGGTCACTAATTAATCCAGGTGTGGCTAGGAACAGCTGGATACTGATCTGTGTGATGA		731424		uncharacterized LOC731424
A_23_P98910	0.00553247	0.0448648	-4.24299	-2.08508	4.24299	down	171.372	944.804	265.782	973.508	215.084	947.567	-1.12249	1.02853	-0.89424	0.89424	-1.31275	1.00299	LRMP	Homo sapiens lymphoid-restricted membrane protein (LRMP), transcript variant 1, mRNA [NM_006152]	AGGTTCTCAGAATGACCGTAAGATAGCTTACATTTCCTCTTTTTGCCTTTATCTCCCCAA	ENST00000354454	4033	NM_006152	lymphoid-restricted membrane protein
A_21_P0011536	0.00326514	0.0389952	-4.19224	-2.06772	4.19224	down	15.725	85.0603	20.4759	77.7494	19.6934	82.2761	-0.908217	1.21534	-0.932217	0.908217	-1.1016	1.13757	LRRC37BP1	Homo sapiens leucine rich repeat containing 37B pseudogene 1 (LRRC37BP1), non-coding RNA [NR_015341]	GGAAAGAAGCAGGGGAAAAGCGTTACAAACAGCTTTTGTTCTACAGCATTTTAAAATATA	ENST00000578386	147172	NR_015341	leucine rich repeat containing 37B pseudogene 1
A_23_P31376	0.00212326	0.036029	-5.01558	-2.32642	5.01558	down	23.8348	167.42	29.0074	156.621	32.9218	127.56	-1.03921	1.46126	-1.16072	1.1876	-1.09126	1.03921	LRRN3	Homo sapiens leucine rich repeat neuronal 3 (LRRN3), transcript variant 3, mRNA [NM_018334]	GCCTCTCTCCAGAAATGAACTGTGATGGTGGACACAGCTATGTGAGGAATTACTTACAGA	ENST00000308478	54674	NM_018334	leucine rich repeat neuronal 3
A_23_P94230	0.00126412	0.0332206	-5.06006	-2.33916	5.06006	down	85.828	494.361	98.6696	517.486	94.1911	470.49	-1.05133	1.16285	-1.25504	1.05133	-1.43522	1.06169	LY96	Homo sapiens lymphocyte antigen 96 (LY96), transcript variant 1, mRNA [NM_015364]	TGAAGCTATTTCTGGGAGCCCAGAAGAAATGCTCTTTTGCTTGGAGTTTGTCATCCTACA	ENST00000284818	23643	NM_015364	lymphocyte antigen 96
A_33_P3255434	0.00474185	0.0428955	-4.84889	-2.27765	4.84889	down	150.474	797.052	154.458	986.627	187.406	735.436	-0.973731	1.11957	-1.3409	1.24992	-1.17511	0.973731	MEG3	Homo sapiens maternally expressed 3 (non-protein coding) (MEG3), transcript variant 1, long non-coding RNA [NR_002766]	TGTGATGCGGTTCCAAAGCACAGGGCTTGGCGCACCCCACTGTGCTCTCAATAAATGTGT	ENST00000398461	55384	NR_002766	maternally expressed 3 (non-protein coding)
A_24_P33982	0.00119778	0.0328252	-10.4128	-3.38029	10.4128	down	27.1901	391.803	36.8756	347.367	40.5344	392.664	-1.622	1.91511	-1.58728	1.56397	-1.56397	1.88852	MILR1	Homo sapiens mast cell immunoglobulin-like receptor 1 (MILR1), transcript variant S2, mRNA [NM_001291317]	GTGGTGATAATCCTAATTCTGGCTTTTTGGGTACTGCCCAAATACAAAACAAGAAAAGCT	ENST00000612535	284021	NM_001291317	mast cell immunoglobulin-like receptor 1
A_23_P211680	0.00224627	0.0361516	-8.00584	-3.00105	8.00584	down	11.8527	96.8794	11.0763	101.138	10.2232	81.8622	-1.22318	1.49593	-1.72578	1.38052	-1.95458	1.22318	MLC1	Homo sapiens megalencephalic leukoencephalopathy with subcortical cysts 1 (MLC1), transcript variant 1, mRNA [NM_015166]	AGACCAGAGAGCTCAAGTTTCAGAGTCAGAATTAGGCACTTGGAACGTTTTTGCTGGCTT	ENST00000311597	23209	NM_015166	megalencephalic leukoencephalopathy with subcortical cysts 1
A_33_P3311403	0.000291789	0.0298991	-4.05136	-2.01841	4.05136	down	11.8795	62.5239	13.5439	56.1552	16.783	59.5634	-0.875805	1.20827	-1.0915	0.875805	-0.895314	1.10852	MRVI1	Homo sapiens murine retrovirus integration site 1 homolog (MRVI1), transcript variant 2, mRNA [NM_130385]	GCATTGAACTGTAGAGTGTCACATACCTGAGTTTGAAAATAAAAGCACATTTCCAAACCT	ENST00000547195	10335	NM_130385	murine retrovirus integration site 1 homolog
A_23_P75769	0.00190364	0.0352875	-7.27065	-2.86209	7.27065	down	53.5445	464.372	68.1339	462.976	63.6591	483.546	-1.3114	1.49321	-1.36863	1.3114	-1.5798	1.52182	MS4A4A	Homo sapiens membrane-spanning 4-domains, subfamily A, member 4A (MS4A4A), transcript variant 2, mRNA [NM_024021]	CACCAAAAGATCAACAGACAAATGCTCCAGAAATCTATGCTGACTGTGACACAAGAGCCT	ENST00000529991	51338	NM_024021	membrane-spanning 4-domains, subfamily A, member 4A
A_24_P146683	0.00635154	0.0470106	-10.9484	-3.45265	10.9484	down	7.73486	110.997	18.3587	149.316	11.3093	148.104	-2.18664	1.34449	-1.34449	1.59487	-2.15661	1.73082	MSMB	Homo sapiens microseminoprotein, beta- (MSMB), transcript variant PSP94, mRNA [NM_002443]	GACCCAAAAAAGACCTGTTCTGTCAGTGAATGGATAATCTAATGTGCTTCTAGTAGGCAC	ENST00000582163	4477	NM_002443	microseminoprotein, beta-
A_33_P3292769	0.00161069	0.0339761	-8.56388	-3.09826	8.56388	down	2.13673	19.6045	2.10189	19.0027	2.54213	22.4182	-1.3317	1.55415	-1.76027	1.3317	-1.5991	1.71788	NFAM1	Homo sapiens NFAT activating protein with ITAM motif 1 (NFAM1), mRNA [NM_145912]	CATATGTGGGTGACAGAAGCATATGTTACAGTGAAACATTAAAACTACAGCAAAGTGAAA	ENST00000329021	150372	NM_145912	NFAT activating protein with ITAM motif 1
A_23_P27734	0.00541424	0.0447722	-4.38614	-2.13295	4.38614	down	76.1472	333.298	81.7022	427.334	76.118	326.757	-0.879867	0.938219	-1.18315	1.1193	-1.39845	0.879867	NPAS1	Homo sapiens neuronal PAS domain protein 1 (NPAS1), mRNA [NM_002517]	GGGCCCGCGGGCACCAGGCTGCCGCGGAAGGGGGACTGAGGACTGGCAGAGCTGCCGGCG	ENST00000449844	4861	NM_002517	neuronal PAS domain protein 1
A_33_P3389728	0.000869947	0.0322856	-4.57918	-2.19509	4.57918	down	17.5658	92.628	17.2609	83.3727	19.4236	85.2831	-0.878734	1.20808	-1.30886	0.878734	-1.25173	1.05913	NR5A2	Homo sapiens nuclear receptor subfamily 5, group A, member 2 (NR5A2), transcript variant 1, mRNA [NM_205860]	GTATCAATGAAATACATATTGTCATGTCAGTTCTTGCCAGGAACTTCTCAACAAAATGGA	ENST00000544748	2494	NM_205860	nuclear receptor subfamily 5, group A, member 2
A_23_P257129	0.00312788	0.0384772	-6.15431	-2.6216	6.15431	down	43.6491	408.781	81.0311	475.525	86.0938	425.282	-1.70155	1.21389	-1.21389	1.25461	-1.23963	1.24122	PAEP	Homo sapiens progestagen-associated endometrial protein (PAEP), transcript variant 2, mRNA [NM_002571]	TACGGTGGCGAACGAGGCCACGCTGCTCGATACTGACTACGACAATTTCCTGTTTCTCTG	ENST00000371768	5047	NM_002571	progestagen-associated endometrial protein
A_23_P36888	0.000167558	0.0298991	-4.26216	-2.09158	4.26216	down	549.926	2980.34	790.637	3443.29	646.021	2468.2	-0.971719	1.15459	-0.852806	1.18543	-1.25741	0.852806	PCED1B	Homo sapiens PC-esterase domain containing 1B (PCED1B), transcript variant 1, mRNA [NM_138371]	TGAACAGACTGACCTTGTTAACTTAAGCCTGGAGTCCATGCCTCGTCTTCCTTTTGTTCA	ENST00000546455	91523	NM_138371	PC-esterase domain containing 1B
A_23_P384748	0.0062064	0.0468056	-6.39022	-2.67587	6.39022	down	44.9802	269.272	43.7807	317.593	41.8015	292.539	-1.13492	1.13492	-1.57878	1.19556	-1.75869	1.22472	PLEKHH2	Homo sapiens pleckstrin homology domain containing, family H (with MyTH4 domain) member 2 (PLEKHH2), mRNA [NM_172069]	TGGGTTACAGAAGAGTTTCTAAGTTCCTAGAGAGCCATTTAATAATTAGTTGGTGAGCCA	ENST00000282406	130271	NM_172069	pleckstrin homology domain containing, family H (with MyTH4 domain) member 2
A_33_P3315719	0.00102318	0.0322856	-4.63664	-2.21308	4.63664	down	37.2724	215.125	42.3329	190.887	43.9396	196.006	-0.933603	1.28353	-1.1548	0.933603	-1.21422	1.11949	PLEKHH2	Homo sapiens pleckstrin homology domain containing, family H (with MyTH4 domain) member 2 (PLEKHH2), mRNA [NM_172069]	CACCGGTATTCCAAACCTTAACAATGAAGGGGGTTAGTCTCTTTTATTTGATTCTTAAAT	ENST00000405000	130271	NM_172069	pleckstrin homology domain containing, family H (with MyTH4 domain) member 2
A_23_P62377	0.000190649	0.0298991	-7.66109	-2.93755	7.66109	down	31.988	321.663	43.9969	349.603	56.1638	368.098	-1.62743	1.39066	-1.57242	1.33335	-1.33335	1.55543	PNCK	Homo sapiens pregnancy up-regulated nonubiquitous CaM kinase (PNCK), transcript variant 1, mRNA [NM_001039582]	AGGCTCTGTCAGTGAGCAGATCCGGAAGAACTTTGCTCGGACACACTGGAAGCGAGCCTT	ENST00000488994	139728	NM_001039582	pregnancy up-regulated nonubiquitous CaM kinase
A_24_P201064	0.00656683	0.0473357	-4.09356	-2.03336	4.09356	down	620.912	2689.11	664.118	2707.02	674.33	3051.78	-0.817455	0.985352	-1.12527	0.817455	-1.21642	1.13811	PPP1R3B	Homo sapiens protein phosphatase 1, regulatory subunit 3B (PPP1R3B), transcript variant 1, mRNA [NM_001201329]	AAGGGGAAATGCACTTTAAAAATCCCAAGAATGGATGTTCTTTGTGTGGTATGAGAGGTT	ENST00000310455	79660	NM_001201329	protein phosphatase 1, regulatory subunit 3B
A_23_P35414	0.00409713	0.0410826	-46.2719	-5.53206	46.2719	down	2.45124	220.617	4.82915	225.425	7.14423	196.212	-3.50318	2.67685	-2.92979	2.53048	-2.47795	2.47795	PPP1R3C	Homo sapiens protein phosphatase 1, regulatory subunit 3C (PPP1R3C), mRNA [NM_005398]	AGCATCCATACTTTTCTACTGTAAATATTTCACTCTCCTCTAGCTATCCTTGATGAGCTT	ENST00000238994	5507	NM_005398	protein phosphatase 1, regulatory subunit 3C
A_23_P218002	0.000452011	0.0311082	-6.31521	-2.65883	6.31521	down	126.019	992.343	151.31	1081.78	173.231	902.598	-1.24941	1.41593	-1.39041	1.36295	-1.30839	1.24941	PRG2	Homo sapiens proteoglycan 2, bone marrow (natural killer cell activator, eosinophil granule major basic protein) (PRG2), transcript variant 1, mRNA [NM_002728]	AAGAAAGATGGGGCTGTTGAGTCTATCTCAGTGCCAGATATGGTGGACAAAAACCTTACG	ENST00000534081	5553	NM_002728	proteoglycan 2, bone marrow (natural killer cell activator, eosinophil granule major basic protein)
A_33_P3329088	0.000474992	0.0312935	-6.53757	-2.70875	6.53757	down	1495.62	11506	1774.27	11970.7	1810.9	11353.8	-1.25568	1.37604	-1.41406	1.25568	-1.49775	1.32706	PRSS8	Homo sapiens protease, serine, 8 (PRSS8), mRNA [NM_002773]	TGGCGCTTGGATCTGGGGTGGGAGTAACAGGGCAGAAATGATTAAAATGTTTGAGCACAA	ENST00000317508	5652	NM_002773	protease, serine, 8
A_23_P407614	0.000189538	0.0298991	-5.98213	-2.58066	5.98213	down	49.3424	348.838	65.6876	428.381	62.0439	335.521	-1.2159	1.29389	-1.20798	1.41276	-1.40348	1.20798	PYDC1	Homo sapiens PYD (pyrin domain) containing 1 (PYDC1), mRNA [NM_152901]	CGAGGCCATCCTGAAGGTGCTGGAGAACCTGACACCGGAGGAGCTCAAGAAGTTCAAGAT	ENST00000302964	260434	NM_152901	PYD (pyrin domain) containing 1
A_21_P0014022	0.00260416	0.0373936	-8.06813	-3.01223	8.06813	down	92.3861	807.496	131.92	1047.62	112.161	988.411	-1.46245	1.3534	-1.3534	1.55151	-1.70065	1.61529	RBSG2	Homo sapiens RBSG2 mRNA for retinoblastoma-specific gene 2, complete cds, clone: HP08657-RBdS081M07. [AB593131]	GGAGCTTGCTAACTTTGAATCTGGCAACTGTATTACATCATCCAACTTAAATATCTGAAT		100652835	AB593131	retinoblastoma-specific gene 2
A_33_P3319680	0.00268121	0.0375675	-10.5483	-3.39894	10.5483	down	2.35874	24.2788	2.33527	30.5775	2.73939	27.7838	-1.52587	1.52587	-1.94517	1.68117	-1.82807	1.69066	RNF165	Homo sapiens ring finger protein 165 (RNF165), transcript variant 1, mRNA [NM_152470]	TCCATACGAAATGCAAACCTTTGATTCTGTATGCTGTGATCTAGTGAAAAACTCCAATAT	ENST00000543885	494470	NM_152470	ring finger protein 165
A_19_P00804072	0.00369177	0.0404245	-4.11326	-2.04028	4.11326	down	44.554	267.517	60.9064	232.848	60.9606	215.246	-0.971299	1.30284	-0.925128	0.925128	-1.03701	0.959436	RNF213	Homo sapiens ring finger protein 213 (RNF213), transcript variant 3, mRNA [NM_001256071]	GTCAAAGAGAGCCTGGGACTGAACGGTGACTTCAGTGTTCTCAACACTTTACTAAATTTT	ENST00000559070	57674	NM_001256071	ring finger protein 213
A_23_P114626	0.000161965	0.0298991	-15.1807	-3.92416	15.1807	down	29.3994	525.979	34.8519	553.321	37.1124	532.369	-1.87246	1.97682	-2.03188	1.87246	-2.05438	1.96448	SERPINC1	Homo sapiens serpin peptidase inhibitor, clade C (antithrombin), member 1 (SERPINC1), mRNA [NM_000488]	TCCTGGTTTTTATAAGAGAAGTTCCTCTGAACACTATTATCTTCATGGGCAGAGTAGCCA	ENST00000367698	462	NM_000488	serpin peptidase inhibitor, clade C (antithrombin), member 1
A_23_P423237	0.00248451	0.03682	-5.00847	-2.32437	5.00847	down	34.0055	223.535	45.2451	266.3	62.5326	236.498	-1.38281	1.022	-1.37567	1.09707	-1.022	1.07356	SGCG	Homo sapiens sarcoglycan, gamma (35kDa dystrophin-associated glycoprotein) (SGCG), mRNA [NM_000231]	ATGTGCCAGTGAAAGTGTTTGGACAAAAACTACATGATCTCAAAATGCACGTGGATGTGA	ENST00000218867	6445	NM_000231	sarcoglycan, gamma (35kDa dystrophin-associated glycoprotein)
A_23_P41390	0.00759849	0.0497473	-5.77719	-2.53037	5.77719	down	30.3075	214.442	34.9605	281.317	49.377	194.76	-1.26423	1.24675	-1.46304	1.46089	-1.0781	1.0781	SH3TC1	Homo sapiens SH3 domain and tetratricopeptide repeats 1 (SH3TC1), mRNA [NM_018986]	GCTGGAGTTTGACGAGGAGACCCTTTATACGTGAAGGTGTACCTGGTGCTCGGTGACATC	ENST00000502669	54436	NM_018986	SH3 domain and tetratricopeptide repeats 1
A_23_P164596	0.00538715	0.0447496	-15.0036	-3.90724	15.0036	down	7.53703	165.451	19.1695	204.987	10.5947	177.541	-2.54314	1.60126	-1.60126	1.73292	-2.56989	1.67325	SIGLEC12	Homo sapiens sialic acid binding Ig-like lectin 12 (gene/pseudogene) (SIGLEC12), transcript variant 1, mRNA [NM_053003]	AACAGGAGGCCATCGGCTATGAGTACTCCGAGATCAACATCCCCAAGTGAGAAACTGCAG	ENST00000291707	89858	NM_053003	sialic acid binding Ig-like lectin 12 (gene/pseudogene)
A_33_P3382498	0.00118889	0.0328018	-9.97429	-3.31821	9.97429	down	5.03646	59.5425	6.74912	64.0417	6.4618	66.5712	-1.59831	1.65326	-1.58089	1.58089	-1.75682	1.78448	SIGLEC14	Homo sapiens sialic acid binding Ig-like lectin 14 (SIGLEC14), mRNA [NM_001098612]	GAGAGGCAGCATTTGTTTTCCAGTTAAAACTCTACCTCATTGTGATTATTATCCAATACA	ENST00000360844	100049587	NM_001098612	sialic acid binding Ig-like lectin 14
A_23_P137470	0.000937038	0.0322856	-7.5583	-2.91806	7.5583	down	2.75129	22.9273	2.33805	19.2701	3.04781	22.316	-1.15942	1.5876	-1.79909	1.15942	-1.52979	1.51885	SIPA1L2	Homo sapiens signal-induced proliferation-associated 1 like 2 (SIPA1L2), mRNA [NM_020808]	GGGCTTACCTCAAGAGGGAAGATAGTTGAGTTTTATTTCCTGTATATCAGGTGACCTGGT	ENST00000308942	57568	NM_020808	signal-induced proliferation-associated 1 like 2
A_23_P145841	0.00105419	0.0322856	-4.72403	-2.24002	4.72403	down	381.648	2468.49	559.736	2614.87	561.611	2282.13	-1.19304	1.18841	-1.0454	1.09405	-1.15375	1.0454	SOSTDC1	Homo sapiens sclerostin domain containing 1 (SOSTDC1), mRNA [NM_015464]	TCAAACCCAGCAAGCTGTCTTAAGTATCAGGACCTTCTTTGGGAATAGTTTTTCCTTTTC	ENST00000307068	25928	NM_015464	sclerostin domain containing 1
A_23_P49060	0.00702067	0.0483877	-4.64503	-2.21569	4.64503	down	31.1013	154.256	26.9955	172.004	41.4024	152.927	-0.978087	1.02032	-1.58721	0.999969	-1.08338	0.978087	SPINT1	Homo sapiens serine peptidase inhibitor, Kunitz type 1 (SPINT1), transcript variant 1, mRNA [NM_181642]	GAGAAGTCTCAGCTAAGCTCACGTCCTGAGAAAGCTCAAAGGTTTGGAAGGAGCAGAAAA	ENST00000562057	6692	NM_181642	serine peptidase inhibitor, Kunitz type 1
A_33_P3260430	5.63851e-06	0.0178314	-24.7149	-4.62731	24.7149	down	210.934	6510.74	241.148	6376.73	275.865	5942.6	-2.21431	2.42179	-2.42605	2.21431	-2.34517	2.2603	SPRR2A	Homo sapiens small proline-rich protein 2A (SPRR2A), mRNA [NM_005988]	CTTCTACCACCTTTGCAATTGTCACTTATCTTTCACTCCCTGAATAAAGTATCTATGCAT	ENST00000392653	6700	NM_005988	small proline-rich protein 2A
A_33_P3260426	0.00445927	0.0421096	-11.2223	-3.4883	11.2223	down	36.6304	598.47	77.8371	669.866	46.5646	545.136	-2.11822	1.60009	-1.43566	1.58521	-2.29006	1.43566	SPRR2A	Homo sapiens small proline-rich protein 2A (SPRR2A), mRNA [NM_005988]	AGAATTCATCAGGACCAAGAAAGGATAAGGATATTTGGCTCACCTCGTTCCACAGCTCCA	ENST00000392653	6700	NM_005988	small proline-rich protein 2A
A_23_P126089	0.00318483	0.038692	-15.6167	-3.96502	15.6167	down	215.916	5136.79	456.382	5570.23	300.116	4584.7	-2.37078	1.88968	-1.69588	1.82908	-2.41377	1.69588	SPRR2C	Homo sapiens small proline-rich protein 2C (pseudogene) (SPRR2C), non-coding RNA [NR_003062]	AGAATTATTTTGATGTCTTCTGTCTCTGTCTGTCACCTGGCATGAGCTTCTACTATCTGT		6702	NR_003062	small proline-rich protein 2C (pseudogene)
A_23_P11644	0.000135263	0.0298991	-22.4795	-4.49054	22.4795	down	145.58	4356.89	181.108	4235.37	186.976	3534.43	-2.12998	2.46156	-2.21982	2.24328	-2.28698	2.12998	SPRR2D	Homo sapiens small proline-rich protein 2D (SPRR2D), mRNA [NM_006945]	TGTCCAGGTGGAGCTAAGAAAAGGAAGTCCTCAGCTGTGCCAGCTCCCAGAGCTTCGGAA	ENST00000368756	6703	NM_006945	small proline-rich protein 2D
A_33_P3325704	0.00437779	0.0418558	-15.266	-3.93225	15.266	down	386.456	8426.3	758.288	8571.63	442.722	7442.9	-2.24672	1.88794	-1.67914	1.73514	-2.56866	1.67914	SPRR2E	Homo sapiens small proline-rich protein 2E (SPRR2E), mRNA [NM_001024209]	AACCATCAAAAAATGCTGTTGATGTTTTCTGTGTCTGTCTGTCACCTGGGCATGGGCTTC	ENST00000368751	6704	NM_001024209	small proline-rich protein 2E
A_33_P3317058	0.000949307	0.0322856	-4.41827	-2.14348	4.41827	down	58.5173	347.942	94.978	411.634	85.2213	332.2	-1.22868	1.03137	-0.934814	1.09641	-1.20436	0.934814	STAG3	Homo sapiens stromal antigen 3 (STAG3), transcript variant 3, mRNA [NM_001282717]	CTACTCTTCCACCAGTGAGCGCGGGCTGGACCTCTTAGATTCTACAGAGCTGGATATTGA	ENST00000426455	10734	NM_001282717	stromal antigen 3
A_23_P416395	0.00111088	0.0324666	-7.05933	-2.81953	7.05933	down	52.6747	456.021	58.7927	495.419	113.167	635.595	-1.66468	1.13737	-1.91102	1.07945	-1.07945	1.58662	STC2	Homo sapiens stanniocalcin 2 (STC2), mRNA [NM_003714]	GAGGACCAAGTATAGTAAAATGCTGACATCTAAAACTAAATAAATAGAAAACACCAGGCC	ENST00000265087	8614	NM_003714	stanniocalcin 2
A_23_P42784	8.43812e-05	0.0285211	-4.16934	-2.05982	4.16934	down	24.0634	127.842	28.6297	124.733	39.1566	142.801	-1.03449	1.0631	-1.18868	0.850109	-0.850109	1.19298	STK31	Homo sapiens serine/threonine kinase 31 (STK31), transcript variant 2, mRNA [NM_032944]	CACAGAAATATCTAGAAATGTTCTGGGACTAGTTGAGTTGTATCTTTAGTATTCAGGTTG	ENST00000354639	56164	NM_032944	serine/threonine kinase 31
A_33_P3225625	0.00185688	0.0348747	-7.74242	-2.95278	7.74242	down	2.5497	23.4717	4.96299	35.8895	2.84104	23.0691	-1.69598	1.19468	-1.13996	1.62985	-2.05792	1.13996	TARP	Homo sapiens TCR gamma alternate reading frame protein (TARP), transcript variant 1, mRNA [NM_001003799]	CTGGACAAAGAACACAGATGTATCGTCAGACATGAGAATAATAAAAACGGAGTTGATCAA	ENST00000610889	445347	NM_001003799	TCR gamma alternate reading frame protein
A_33_P3328559	0.00678965	0.0478873	-4.89995	-2.29277	4.89995	down	30.5833	173.685	44.6013	192.431	28.5988	159.926	-1.09222	1.10158	-0.952743	1.07197	-1.70705	0.952743	TBC1D10C	Homo sapiens TBC1 domain family, member 10C (TBC1D10C), transcript variant 1, mRNA [NM_198517]	GGAAGGGGTTGGCTGAGTCAAGGGACCCCAGAGGGCACCAGGAATAAAATCTTCTTGAAC	ENST00000526474	374403	NM_198517	TBC1 domain family, member 10C
A_23_P64372	0.00169991	0.0341785	-5.06	-2.33914	5.06	down	41.8413	230.478	48.8489	286.301	48.8947	228.52	-1.05385	1.09592	-1.23531	1.23135	-1.34713	1.05385	TCN1	Homo sapiens transcobalamin I (vitamin B12 binding protein, R binder family) (TCN1), mRNA [NM_001062]	CCAGAAAATGAATGATACTATATTTGGTTTCACAATGGAGGAGCGCTCATGGGGGCCCTA	ENST00000257264	6947	NM_001062	transcobalamin I (vitamin B12 binding protein, R binder family)
A_23_P423108	0.00255935	0.0371884	-17.0679	-4.09322	17.0679	down	10.1396	170.935	7.06721	166.788	9.18749	133.725	-1.68979	2.07373	-2.61544	1.86082	-2.35008	1.68979	TDRD10	Homo sapiens tudor domain containing 10 (TDRD10), transcript variant 2, mRNA [NM_182499]	TCAGTTCCCCAACTTGGCATGAACATTTGAACCAAACATAGGAAACTACCATTAGGTTGA	ENST00000368482	126668	NM_182499	tudor domain containing 10
A_23_P375165	0.0016736	0.0341123	-6.22165	-2.6373	6.22165	down	145.738	1278.32	195.878	1132.41	184.91	1022.82	-1.24516	1.57577	-1.22345	1.22345	-1.41975	1.22431	TEX19	Homo sapiens testis expressed 19 (TEX19), mRNA [NM_207459]	GGGAGAGCTGGTTTTAAATGTTGGCCGTTGATGCAATTTAACCATTTAATTCCTGTTGCT	ENST00000333437	400629	NM_207459	testis expressed 19
A_33_P3780311	0.000773105	0.0322856	-10.5447	-3.39844	10.5447	down	105.332	1561.58	155.431	1576.14	149.874	1361.34	-1.75342	1.8247	-1.59696	1.66062	-1.76266	1.59696	TLR8-AS1	Homo sapiens TLR8 antisense RNA 1 (TLR8-AS1), long non-coding RNA [NR_030727]	TGGATGACATTTTGGTGGCTCCGTGTTACATTCACCAGACTGTACAAGTTTTGAGCCCAA		349408	NR_030727	TLR8 antisense RNA 1
A_33_P3310784	0.000102929	0.0298991	-7.57985	-2.92217	7.57985	down	52.9986	478.58	70.8119	580.982	82.0021	561.389	-1.48727	1.3756	-1.4741	1.47786	-1.3756	1.57608	TM6SF1	Homo sapiens transmembrane 6 superfamily member 1 (TM6SF1), transcript variant 1, mRNA [NM_023003]	TGTAAAAAATTACAATTTAGTGCCAACAGTAGTGAGCATGAAATGAAACTATTCAAAAGA	ENST00000379384	53346	NM_023003	transmembrane 6 superfamily member 1
A_24_P932416	0.00086103	0.0322856	-9.23457	-3.20704	9.23457	down	2.59982	33.1457	2.13707	21.1856	3.23434	23.471	-1.26863	2.09184	-1.95628	1.26863	-1.47161	1.56414	TMEM14E	Homo sapiens transmembrane protein 14E (TMEM14E), mRNA [NM_001123228]	GGGATCTTGCTAGGTATTATGCGAATAAGATTCTAACACTCTGGAACATTTACGCTTGTG	ENST00000408960	645843	NM_001123228	transmembrane protein 14E
A_23_P92334	5.37259e-05	0.0285211	-7.88204	-2.97857	7.88204	down	14.9115	147.371	20.6768	167.737	21.0381	149.655	-1.52612	1.46697	-1.4594	1.47625	-1.54758	1.4594	TMEM156	Homo sapiens transmembrane protein 156 (TMEM156), transcript variant 1, mRNA [NM_024943]	TGAAGAATACTCAGAAGTTTATTTTGTGAATGAGTAGACTGGAAAATGTTTGTGTCCAGC	ENST00000381938	80008	NM_024943	transmembrane protein 156
A_24_P105733	0.006326	0.0469664	-10.077	-3.333	10.077	down	2.59065	24.1983	2.2242	33.4453	3.24314	27.5187	-1.45583	1.45583	-2.08072	1.74525	-1.64979	1.61158	TNS1	Homo sapiens tensin 1 (TNS1), mRNA [NM_022648]	GACCTTGATGATGCTTTCAAAGATGATCGATTTCCAGAGTATGGCAAAGTGGAGTTTGTA	ENST00000479185	7145	NM_022648	tensin 1
A_24_P68079	0.0024907	0.03682	-6.85002	-2.77611	6.85002	down	98.7199	912.886	115.703	936.212	201.991	1010.57	-1.63547	1.26169	-1.81132	1.12062	-1.12062	1.3786	TRANK1	Homo sapiens tetratricopeptide repeat and ankyrin repeat containing 1 (TRANK1), mRNA [NM_014831]	AATTGTTTCCTTGAAATGCTTGTTTCCAATTTTTCTTAGATTATGTTTCTAATTTTTATT	ENST00000429976	9881	NM_014831	tetratricopeptide repeat and ankyrin repeat containing 1
A_21_P0012440	0.00724672	0.0488186	-6.14858	-2.62025	6.14858	down	64.4347	516.456	81.9009	399.376	53.1099	367.87	-1.07125	1.61962	-1.13007	1.07125	-1.86814	1.10041	TRANK1	Homo sapiens tetratricopeptide repeat and ankyrin repeat containing 1 (TRANK1), mRNA [NM_014831]	ATTTTTCAGCCTTGGGAAGTGGAATGAGGCATTTGTTGCTGCCAAGGAATGTCTCCAATG	ENST00000429976	9881		tetratricopeptide repeat and ankyrin repeat containing 1
A_24_P381199	0.000277203	0.0298991	-4.6504	-2.21736	4.6504	down	474.827	2741.39	622.207	2934.73	773.325	3326.35	-1.16203	1.05554	-1.1769	0.97639	-0.97639	1.30481	TRIM6	Homo sapiens tripartite motif containing 6 (TRIM6), transcript variant 1, mRNA [NM_001003818]	GGTAGAGAGGTGCAATATGTTTTTTGAACCAGCTATAAAAGAAATTAAGAGGTACATGTG	ENST00000618326	117854	NM_001003818	tripartite motif containing 6
A_33_P3237634	0.000477301	0.0312935	-4.9206	-2.29883	4.9206	down	240.567	1396.52	258.272	1326.39	314.134	1462.07	-0.986827	1.23863	-1.28924	0.986827	-1.11992	1.27505	TSC22D3	Homo sapiens TSC22 domain family, member 3 (TSC22D3), transcript variant 2, mRNA [NM_004089]	CCTTATCCTGATGTATGGTTCCAGGATTTGGATTTTGATTTTCCAAATGTAGCTTGAAAT	ENST00000372383	1831	NM_004089	TSC22 domain family, member 3
A_23_P73150	0.000375003	0.030042	-4.63715	-2.21324	4.63715	down	147.449	807.625	184.328	903.163	160.066	692.65	-0.945146	1.19646	-1.02795	1.18029	-1.34472	0.945146	TTC25	Homo sapiens tetratricopeptide repeat domain 25 (TTC25), transcript variant 1, mRNA [NM_031421]	CAGGAAGCTGGTGTTCAGAGGGATCATGGGATTTTATTAAACTGGATTTTCAAGCGATTT	ENST00000591658	83538	NM_031421	tetratricopeptide repeat domain 25
A_23_P390097	0.00406347	0.0410826	-4.412	-2.14143	4.412	down	23.2855	151.467	34.3397	158.002	38.0059	127.017	-1.14733	1.24231	-0.991746	1.12577	-0.958568	0.958568	TTC39B	Homo sapiens tetratricopeptide repeat domain 39B (TTC39B), transcript variant 1, mRNA [NM_152574]	AAACCTTCCTCAGATTGATCAGAACTTGAAGGATGGAATTTTTCCCCAATTAGCATCGGC	ENST00000380853	158219	NM_152574	tetratricopeptide repeat domain 39B
A_33_P3263906	0.00728705	0.0489622	-5.52913	-2.46705	5.52913	down	15.7481	83.1086	10.9159	81.7387	17.7723	88.5383	-0.943253	1.1447	-1.87687	0.943253	-1.28683	1.20625	TUBE1	tubulin, epsilon 1 [Source:HGNC Symbol;Acc:HGNC:20775] [ENST00000368657]	GCTTGATAAAGATAGAACTATTCGGAGGGTGTGTAGTTTGAGTATATAAACATACACCTT	ENST00000368657	51175		tubulin, epsilon 1
A_33_P3409062	0.00297825	0.0381607	-8.78428	-3.13492	8.78428	down	170.307	1919.67	191.443	2150.28	281.033	1752.37	-1.61302	1.56977	-1.84911	1.55596	-1.40845	1.40845	TYROBP	Homo sapiens TYRO protein tyrosine kinase binding protein (TYROBP), transcript variant 1, mRNA [NM_003332]	GAGTGCCATCCCTGAGAGACCAGACCGCTCCCCAATACTCTCCTAAAATAAACATGAAGC	ENST00000262629	7305	NM_003332	TYRO protein tyrosine kinase binding protein
A_23_P136671	0.000885508	0.0322856	-5.82231	-2.54159	5.82231	down	4.36752	28.7548	6.20568	38.5019	5.98109	33.6591	-1.25448	1.15257	-1.15257	1.39623	-1.31892	1.35	UGT2B7	Homo sapiens UDP glucuronosyltransferase 2 family, polypeptide B7 (UGT2B7), mRNA [NM_001074]	TCGTCACAAAATGTTGTCTGTTTTGTTTCTGGAAGTTTGCTAGAAAAGCAAAGAAGGGAA	ENST00000622664	7364	NM_001074	UDP glucuronosyltransferase 2 family, polypeptide B7
A_23_P52336	0.0016794	0.0341123	-8.91513	-3.15626	8.91513	down	635.299	5968.38	723.789	6967.41	800.15	7301.63	-1.45998	1.45998	-1.67672	1.50579	-1.64518	1.7211	UNC5B	Homo sapiens unc-5 homolog B (C. elegans) (UNC5B), transcript variant 1, mRNA [NM_170744]	AAACCACAAGGGAAAAGAAAAACCCAGTTTCTTAGGAAACGCAAACGATTTATTATCCAG	ENST00000335350	219699	NM_170744	unc-5 homolog B (C. elegans)
A_32_P524014	0.0018823	0.035018	-4.80289	-2.2639	4.80289	down	92.4251	568.528	123.691	552.793	137.817	646.888	-1.07471	1.23431	-1.05918	1.01634	-1.01634	1.39083	UTRN	Homo sapiens utrophin (UTRN), mRNA [NM_007124]	CTGCCTGTATTTGTATGCAAAATGTCCTCTATCTGCTATTAAAGAAAAGCTACGTAAAAC	ENST00000367545	7402	NM_007124	utrophin
A_23_P43476	0.00079197	0.0322856	-4.1261	-2.04478	4.1261	down	17.218	95.0404	26.0243	107.069	18.0832	65.1457	-0.884602	1.26816	-0.693526	1.26261	-1.33191	0.693526	VLDLR	Homo sapiens very low density lipoprotein receptor (VLDLR), transcript variant 1, mRNA [NM_003383]	TCTAAACAAATAATACCCCCGTCGGAATGGTAACCGAGCCAGCAGCTGAAGTCTCTTTTT	ENST00000382100	7436	NM_003383	very low density lipoprotein receptor
A_19_P00320469	0.000883848	0.0322856	-10.8628	-3.44132	10.8628	down	2.68303	32.3001	2.25663	29.618	2.77425	26.212	-1.47333	1.80441	-2.12789	1.50187	-1.94313	1.47333	VLDLR-AS1	Homo sapiens VLDLR antisense RNA 1 (VLDLR-AS1), long non-coding RNA [NR_015375]	CCCACTTAGACTTAAGCCCTCTTAATTTCAAAATTACGTTCATATGTGCCAATAAAGTTG		401491		VLDLR antisense RNA 1
A_33_P3209646	0.00503077	0.0436919	-4.22757	-2.07983	4.22757	down	74.8506	421.003	103.592	379.419	98.9583	422.714	-0.958171	1.22171	-0.894202	0.894202	-1.0734	1.1978	WDFY2	Homo sapiens WD repeat and FYVE domain containing 2 (WDFY2), mRNA [NM_052950]	GTAACTACTTTGAGTCTTTTCTGCATGATTGCTCTTTGAGAGAACTTTAACAAGGGAATT	ENST00000298125	115825	NM_052950	WD repeat and FYVE domain containing 2
A_21_P0009342	0.00360875	0.0401852	-7.6902	-2.94302	7.6902	down	15.8013	120.838	16.1457	134.193	15.2378	126.985	-1.29843	1.32467	-1.67218	1.29843	-1.86885	1.36649	WFDC21P	Homo sapiens WAP four-disulfide core domain 21, pseudogene (WFDC21P), non-coding RNA [NR_030732]	TTCCAAGATGTGACTGTCTGGAGTTCCTTGACTAGGAAGATGGATGAAAACAGCAAGCCT	ENST00000587298	645638	NR_030732	WAP four-disulfide core domain 21, pseudogene
A_21_P0011045	0.00279385	0.0378849	-9.26719	-3.21213	9.26719	down	35.841	418.771	46.945	373.306	43.8659	437.626	-1.44567	1.78895	-1.46117	1.44567	-1.67221	1.82272	XLOC_l2_002952	BROAD Institute lincRNA (XLOC_l2_002952), lincRNA [TCONS_l2_00005598]	CTCATTGTGAGGAATTTTGTTCTCTTGTTGACTGGATCTGAAAAATAAACACAACTTGAC
A_21_P0011852	0.00619485	0.0468014	-7.02556	-2.81261	7.02556	down	18.1966	116.606	15.891	139.32	18.4345	132.521	-1.18402	1.18402	-1.78434	1.2633	-1.68332	1.33884	XLOC_l2_007566	BROAD Institute lincRNA (XLOC_l2_007566), lincRNA [TCONS_l2_00013997]	GTCAGTATGAGAATGCAGTTTAAGTTTCCCTGATGCTTTTTCACACTTCTATTACTAGAA
A_21_P0012169	0.00714618	0.0485758	-5.17151	-2.37059	5.17151	down	5.23962	29.5992	6.54371	30.8479	3.7284	22.5526	-0.882069	1.30409	-0.966287	1.18623	-1.89101	0.882069	XLOC_l2_008979	BROAD Institute lincRNA (XLOC_l2_008979), lincRNA [TCONS_l2_00016969]	CCATTTTTCCCAGAGTTTCCCCAAAAAGGTTATGACATTTTATAAGAATGCTTCACTTGT
A_21_P0012935	0.00112679	0.0325716	-4.98271	-2.31693	4.98271	down	410.443	2283.55	435.179	2380.92	521.786	2469.78	-1.02346	1.1407	-1.3439	1.02346	-1.19522	1.22404	XLOC_l2_012323	BROAD Institute lincRNA (XLOC_l2_012323), lincRNA [TCONS_l2_00023270]	GCAACATGGACTTACAGGAAACATCCTCCAATAAAAACTTAGGTTTTTAGCATGATTCGG
A_21_P0013288	0.00137705	0.0332716	-4.28727	-2.10006	4.28727	down	125.851	630.701	141.374	612.638	156.776	662.557	-0.896992	1.11639	-1.13406	0.896992	-1.09803	1.15771	XLOC_l2_013741	BROAD Institute lincRNA (XLOC_l2_013741), lincRNA [TCONS_l2_00026420]	GTGGTTACTTTGTCACATCAGAGCTTGTATTGATATAACTGTCTTGTACATGTATTGCTT
A_21_P0013752	0.00412818	0.0412322	-6.378	-2.67311	6.378	down	3.47101	27.3518	10.413	57.398	3.87233	26.939	-1.89737	0.768971	-0.717275	1.66087	-2.25756	0.717275	XLOC_l2_015441	BROAD Institute lincRNA (XLOC_l2_015441), lincRNA [TCONS_l2_00030131]	CACAGTGGAAAGTTAGGGAGTAGGTGTGTTGTTGTTTGTTTTGGATATTGTTGGACTTTG
A_32_P85591	0.00663511	0.047494	-6.02329	-2.59055	6.02329	down	17.0358	152.388	22.3282	159.516	49.0129	195.198	-1.87214	0.977103	-1.88671	0.865586	-0.865586	1.30453	XLOC_l2_015786	BROAD Institute lincRNA (XLOC_l2_015786), lincRNA [TCONS_l2_00030570]	GGCAAGAGAGAAAGTGAATACGCTGATATAAGAAGCAAGAAACCTTCCTTCCTTCCAGAT
A_21_P0004271	0.000248726	0.0298991	-29.8963	-4.90189	29.8963	down	15.1728	626.01	21.7171	662.114	25.1136	621.323	-2.58356	2.4712	-2.47109	2.37462	-2.37462	2.43059		ATPase, H+ transporting, lysosomal accessory protein 1-like [Source:HGNC Symbol;Acc:HGNC:28091] [ENST00000508366]	GAAATGGATACAATGACTACAGCCCATCATAGAACCTCATGTTTAGAGGACCAAATTTCC	ENST00000508366		XR_108587
A_33_P3261520	0.00188195	0.035018	-23.2421	-4.53867	23.2421	down	35.4712	1029.53	62.7495	1216.83	41.804	1086.09	-2.48271	2.06462	-2.06462	2.12829	-2.76375	2.11202		ATPase, H+ transporting, lysosomal accessory protein 1-like [Source:HGNC Symbol;Acc:HGNC:28091] [ENST00000508366]	GCTTGACATTTTTTGTTTGCCTTGGAGGGGGTACTTTTAAAAATTCCTCTTTTGAAAACA	ENST00000508366		XR_108587
A_21_P0014364	0.000199802	0.0298991	-21.1867	-4.40509	21.1867	down	2.95929	76.7003	2.63535	55.3978	3.13424	63.7179	-1.86858	2.51546	-2.44071	1.86858	-2.30375	2.21817		Q8VA96_WSSV (Q8VA96) Wsv531 (WSSV057), partial (24%) [THC2581701]	AAACTTGGACATTTTCTGGAGTTACATGTTTTTCTTGGGATGTACTTCAAATTAAGGAGC
A_33_P3310567	0.000171199	0.0298991	-18.5643	-4.21446	18.5643	down	30.4398	750.14	43.9001	809.506	42.5082	697.041	-2.1495	2.16177	-2.02609	2.09418	-2.18575	2.02609		BCL2/adenovirus E1B 19kDa interacting protein 3 pseudogene 41 [Source:HGNC Symbol;Acc:HGNC:49721] [ENST00000616656]	CACATCACCTGCATTTATTTGTCCGGGAATAGTGGCATTCCTAATTTAGTAAAATAAAAG	ENST00000616656
A_21_P0005965	0.00661478	0.0474364	-11.8311	-3.56451	11.8311	down	13.2247	141.658	12.9919	153.403	11.1833	170.543	-1.52334	1.5859	-1.95383	1.52334	-2.28326	1.82386			GATTAGGAAATCTCCATGATATAAAATGATGAAAGTTCGAATCATTGTCACCCTACCGGA	ENST00000521359
A_33_P3282963	0.00220526	0.0360957	-10.7239	-3.42276	10.7239	down	3.59784	40.7056	2.83691	30.6504	2.98418	35.0657	-1.30068	1.88747	-2.04836	1.30068	-2.08852	1.64255		Q5VXK9_HUMAN (Q5VXK9) Tight junction protein 2 (Zona occludens 2), complete [THC2709782]	GGATCCTCAGTACTTTTGGAGGGGTGTGAAGATATGTGTAAGTTATCTTCCTACTTTTCC
A_33_P3395314	0.0010482	0.0322856	-8.73134	-3.1262	8.73134	down	88.1813	838.722	78.2331	808.469	111.397	878.629	-1.35366	1.58413	-1.93121	1.35366	-1.53452	1.62143			CAGTCAGTCATTTGGGACCATATTGTCTGTGGTTTTCAGGACAGGGAGCATCGGGACTCA
A_24_P288915	0.00059855	0.0319891	-8.55081	-3.09606	8.55081	down	33.0138	315.47	29.441	281.295	39.5117	315.12	-1.30081	1.6437	-1.87091	1.30081	-1.55963	1.61234		coiled-coil domain containing 144B (pseudogene) [Source:HGNC Symbol;Acc:HGNC:26704] [ENST00000445752]	CAGCAGATTCCTAGGAAGGAAAATGAAGAGCATGACAGGTAAGCCTATAGCAGCGTTTAA	ENST00000445752		AK093811
A_21_P0012343	0.000345925	0.0298991	-8.37276	-3.0657	8.37276	down	2.45467	23.6256	2.58534	23.4664	2.66062	20.8197	-1.37136	1.58353	-1.7014	1.3963	-1.77317	1.37136		sphingomyelin phosphodiesterase 4, neutral membrane (neutral sphingomyelinase-3) pseudogene 1 [Source:HGNC Symbol;Acc:HGNC:39673] [ENST00000443839]	TCTGCAGCTTTTTATGAGATGGTGGAAGTTCTGAGCAAAGACTCTTGTTGAGGCACTGCT	ENST00000443839
A_33_P3355252	0.000279369	0.0298991	-8.22495	-3.04001	8.22495	down	83.287	854.706	114.415	936.489	96.2957	742.934	-1.43435	1.61305	-1.3811	1.56742	-1.743	1.3811		Q5VXX5_HUMAN (Q5VXX5) OTTHUMP00000030153, complete [THC2696515]	ATGGGCCATAGCCAGGTTGGGATGCATGTCTTCCACAGGATGGGAACTACCTCCAGCTGA	ENST00000379526
A_21_P0014843	0.00754412	0.0497093	-7.11614	-2.83109	7.11614	down	48.2548	436.228	82.7241	458.808	52.9256	443.027	-1.56629	1.29818	-1.19352	1.19352	-1.95103	1.29073		Homo sapiens cDNA FLJ26877 fis, clone PRS09087. [AK130387]	ACAAGGAATCACCTATATTGCCTGCATGGATATAACAAGGGCTTTCTAGCTCCTGTGCAC			AK130387
A_33_P3381671	0.00482915	0.0430474	-7.08072	-2.8239	7.08072	down	39.1225	449.905	68.1555	429.152	72.0398	411.344	-1.68102	1.53066	-1.28506	1.28506	-1.31826	1.37163			AGAACTACAGGAAAGGAGTAGTATCTCTGAATTATCGTGTGGAAGGTCGCTTGTCTAGCC	ENST00000510284
A_33_P3419485	0.00141362	0.0334244	-6.70531	-2.7453	6.70531	down	7.81149	58.9747	5.63553	46.0696	5.99169	34.0876	-0.891978	1.71259	-1.76789	1.17883	-1.79265	0.891978		BX106402 Soares_NFL_T_GBC_S1 Homo sapiens cDNA clone IMAGp998J223812, mRNA sequence [BX106402]	TGGCGCATGCTTGTTTCACAAAACGCCAAGAGTAGATCAGTGGATGTCATTGGGAAAAAA			BX106402
A_33_P3221009	0.00225268	0.0361516	-6.65305	-2.73402	6.65305	down	41.1815	318.97	46.4517	292.444	47.0816	331.153	-1.16938	1.47211	-1.40051	1.16938	-1.49424	1.49643		Homo sapiens cDNA FLJ45966 fis, clone PLACE7015647. [AK127863]	GTGTGTGCGTACATAAAATCGTCGAAACTTCCTCAATAAATGAAGAGATGTCCTTTTTGT	ENST00000382488
A_21_P0005265	0.00120902	0.0329283	-6.03555	-2.59348	6.03555	down	232.329	1861.79	262.96	1485.07	274.099	1550.88	-1.09348	1.59711	-1.31967	1.09348	-1.37298	1.30375			AATGAGAGTCCTATGGCTATTGATATCTAACATCCTGGCTTCACTCACATGGATGAGCCC	ENST00000445293
A_21_P0013507	0.00296398	0.0381607	-5.78034	-2.53115	5.78034	down	9.4566	82.0136	9.89811	56.4857	15.124	68.7371	-1.12428	1.68032	-1.46332	0.964873	-0.964873	1.39579		asparagine-linked glycosylation 1-like 13, pseudogene [Source:HGNC Symbol;Acc:HGNC:44382] [ENST00000522393]	TAATGAATGTGTGAATAGAAAACACCTAGATGCTCAGAAGAATGGGTAGTGAAATATTCG	ENST00000522393
A_24_P178444	0.00364293	0.0402213	-5.56574	-2.47657	5.56574	down	116.291	972.619	237.224	1185.57	203.35	976.897	-1.67625	1.07603	-1.0526	1.18419	-1.38806	1.0526			CTGAGCTGGTGTATACTGGTTTCTGGCTTTCCGGCACAGCCCTGAGTGTGAATTTGTCCG	ENST00000526512
A_33_P3407049	0.00202232	0.0355215	-5.05825	-2.33864	5.05825	down	139.998	819.837	139.917	695.313	147.021	761.495	-0.911461	1.32661	-1.31716	0.911461	-1.35888	1.19034			AAGAGAAGCTCACTGCAGAATGGACTAGAAGCCAAAACTATGACACTTGAGTTTTTCACC
A_23_P166280	0.00174202	0.0343709	-4.98344	-2.31714	4.98344	down	157.196	1080.7	294.745	1374.97	212.838	956.595	-1.38288	1.08659	-0.880842	1.25655	-1.46372	0.880842		inducible T-cell co-stimulator ligand [Source:HGNC Symbol;Acc:HGNC:17087] [ENST00000407780]	CTCAGGGGAGTTCTCAGCTTGGACCCTTATCTCCCCAGAATCCTGGAACCTGCTCCTTCT	ENST00000407780
A_21_P0012363	0.00515938	0.0441023	-4.78584	-2.25877	4.78584	down	7.98136	44.0508	12.4787	54.6072	6.4814	34.2601	-1.00005	1.15255	-0.760152	1.285	-1.81841	0.760152		PREDICTED: Homo sapiens uncharacterized LOC102723596 (LOC102723596), ncRNA [XR_425555]	ATCAGAAGTCTTCGTCCAAGAATTAGCTTTGCACCATCTACAGACCTAAGCAGCTGCAGA	ENST00000425894		XR_425555
A_33_P3337931	0.00325247	0.0389251	-4.33392	-2.11567	4.33392	down	897.553	4467.32	1023.42	4299.12	995.295	4513.23	-0.885318	1.11816	-1.10085	0.885318	-1.25423	1.10315			CTACCAAAGCTGTGTATTTTTCATTTCTTCATGGCACTGTGCTGTTAATTTCTGTTAACA
A_33_P3421183	0.00299536	0.0382004	-4.30694	-2.10666	4.30694	down	16.4965	81.1911	13.6968	57.8881	23.8004	106.465	-0.666281	1.32102	-1.33947	0.655491	-0.655492	1.68224		general transcription factor IIi [Source:HGNC Symbol;Acc:HGNC:4659] [ENST00000473333]	GGAGGATTACACTACAAGTTTAATTCTGCAGGTTTCTTTGAAAAGAACCAAACTGTATGA	ENST00000473333
A_33_P3349727	0.00165371	0.0340346	-4.11069	-2.03938	4.11069	down	56.7735	285.498	52.6783	209.506	62.093	251.169	-0.697184	1.32114	-1.21006	0.697184	-1.08601	1.10656			GAGTACCAGTATGTCGACAACAACATCTTCTTTGAGTTCTTTGTAAGACCTTTTGTATTC
